# Supplementary material
Source: ML conference proceedings conference paper supplement (https://openreview.net/forum?id=cZWCjan02B)
Supplement: supplementary_material [file attachment]

Convolution-part for batch size 2, D=768, 18 layers, L=2<sup>16</sup>
