# Supplementary material (part 1 of 2)
Source: ML conference proceedings conference paper supplement (https://openreview.net/forum?id=cZWCjan02B)

Hyena, batch size 1, D=768, 18 layers, L=2<sup>17</sup>

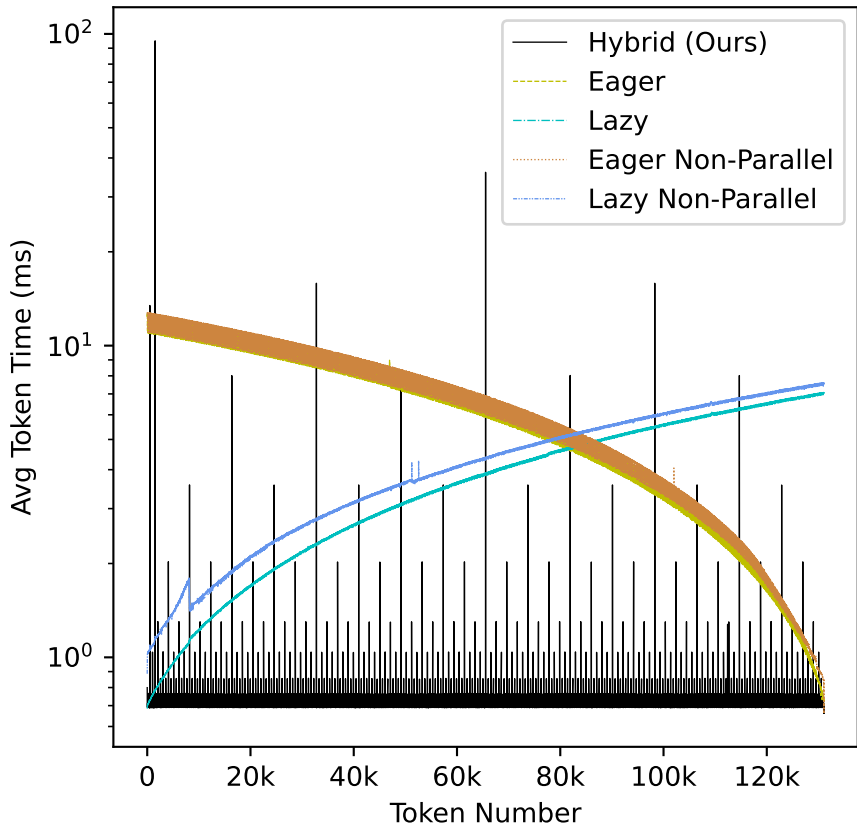

Supplement: supplementary_material [file attachment]

Synthetic, batch size 2, D=864, 36 layers, L=2<sup>15</sup>

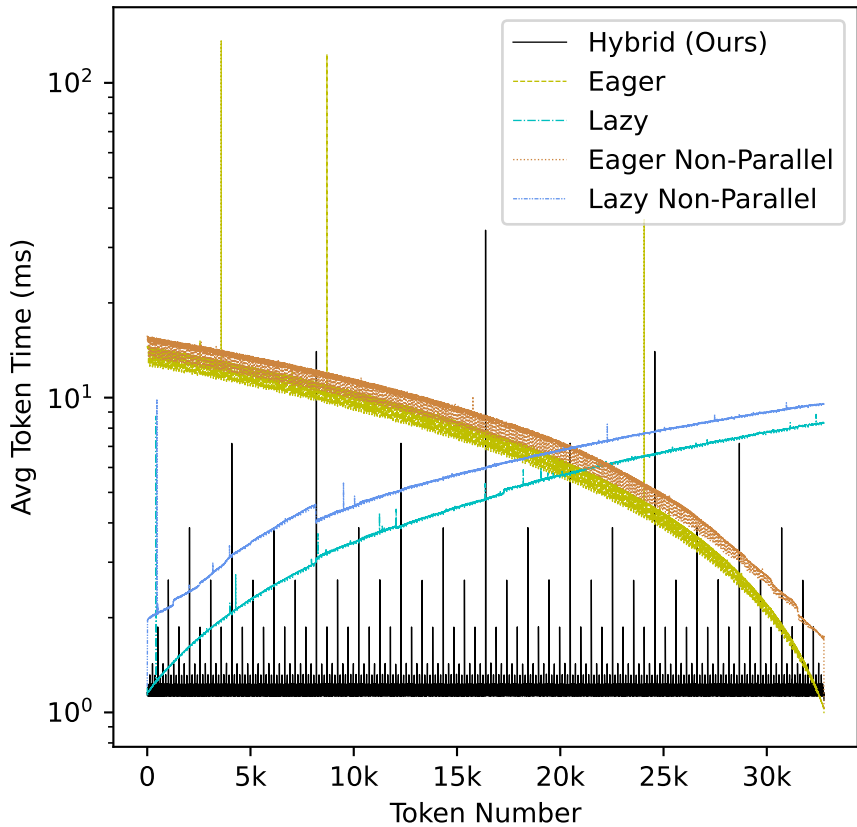

Supplement: supplementary_material [file attachment]

Hyena, batch size 4, D=768, 36 layers, L=2<sup>14</sup>

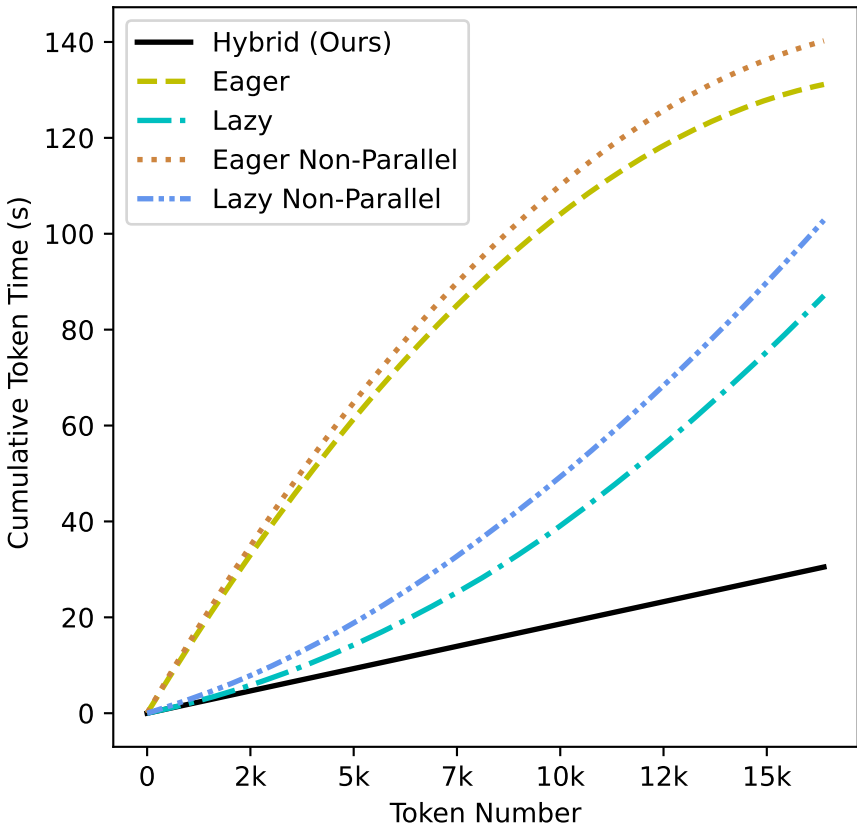

Supplement: supplementary_material [file attachment]

Synthetic, batch size 8, D=256, 18 layers, L=2<sup>15</sup>

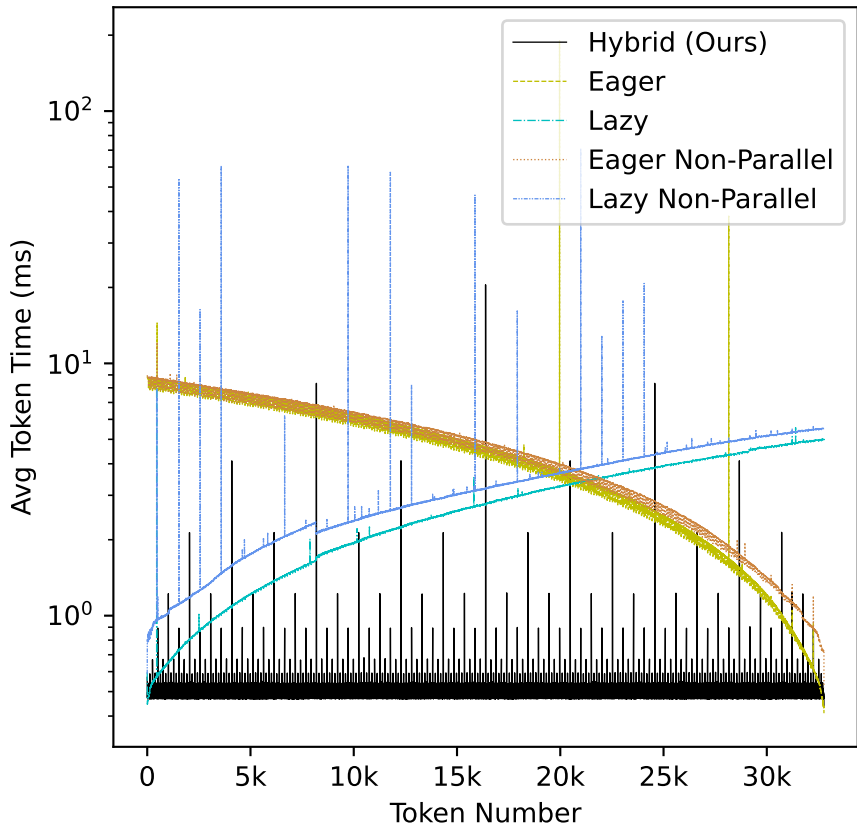

Supplement: supplementary_material [file attachment]

Hyena, batch size 1, D=256, 18 layers, L=2<sup>18</sup>

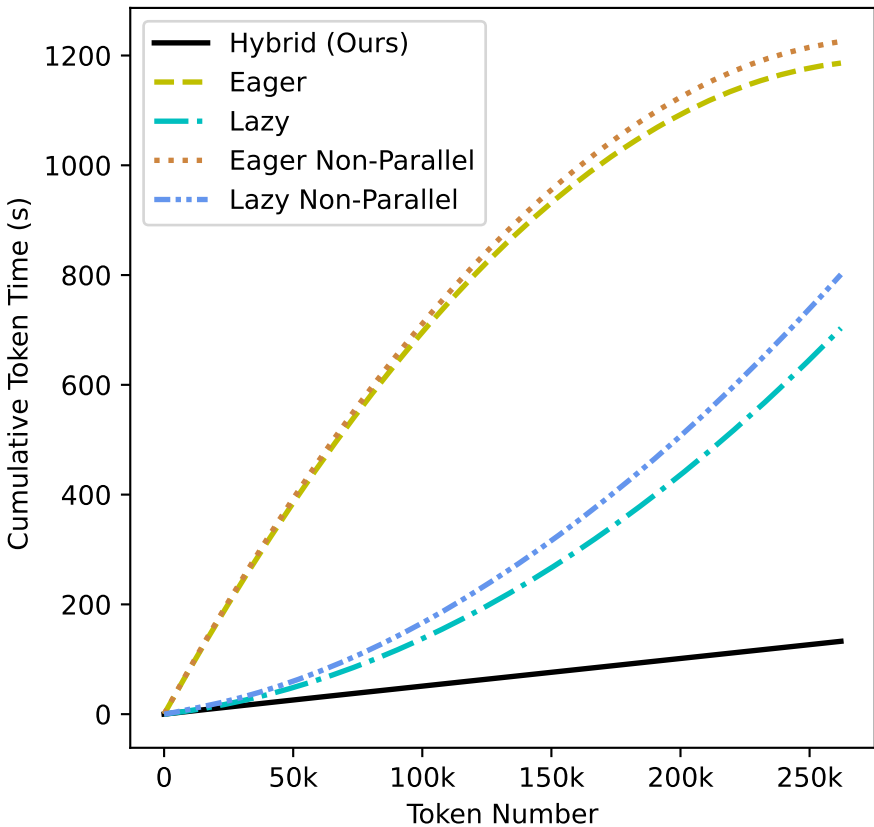

Supplement: supplementary_material [file attachment]

Convolution-part for batch size 2, D=768, 36 layers, L=2<sup>15</sup>

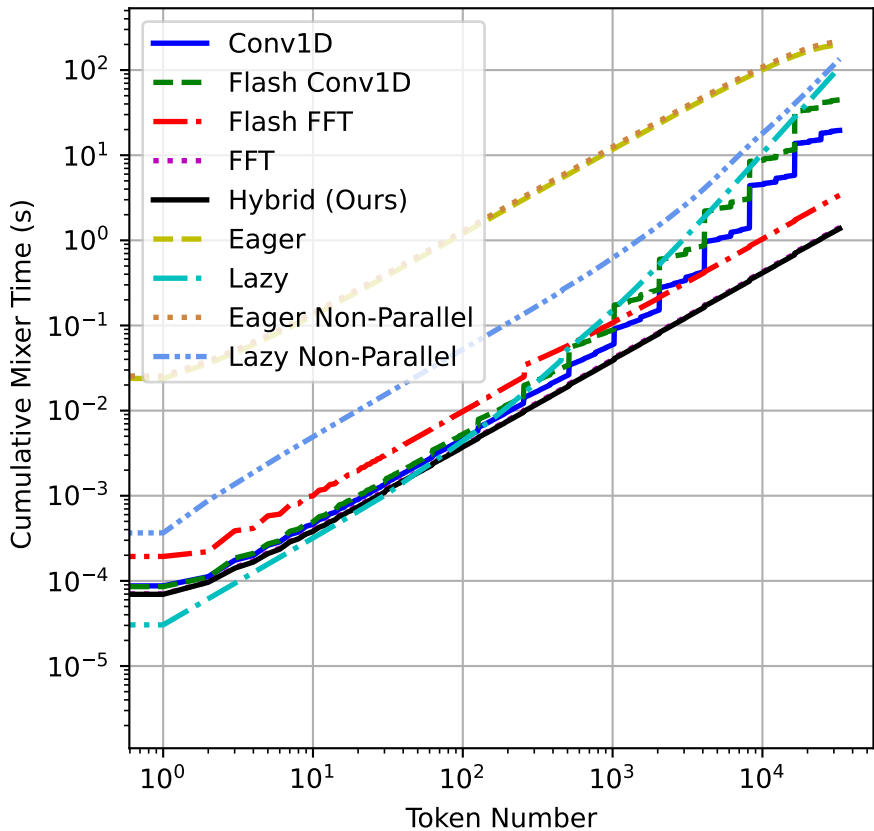

Supplement: supplementary_material [file attachment]

Hyena, batch size 1, D=256, 18 layers, L=2<sup>18</sup>

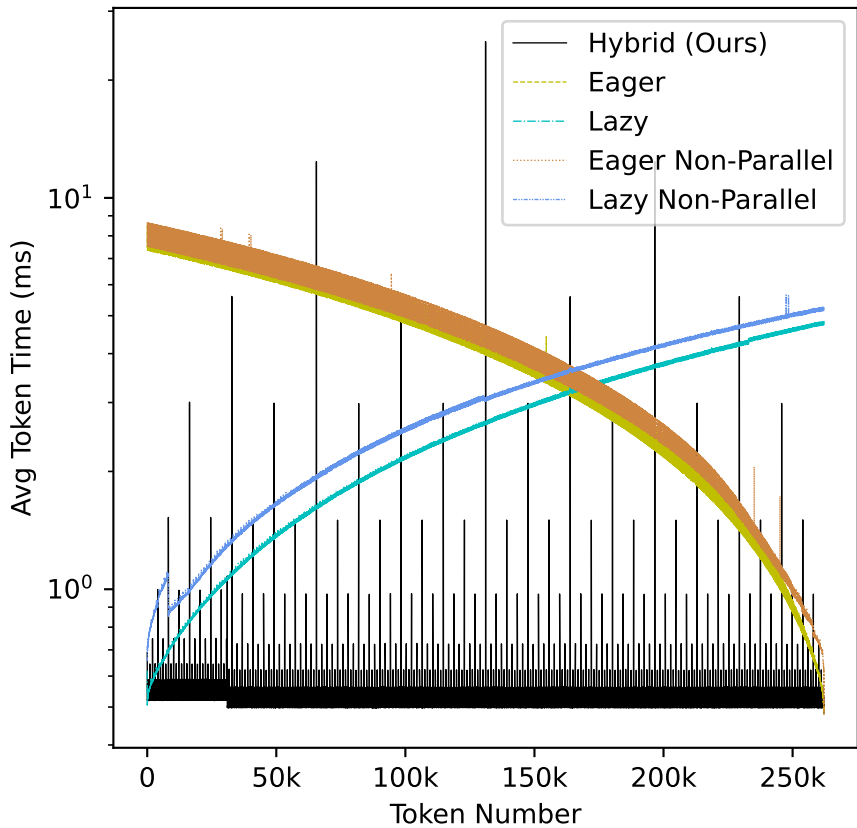

Supplement: supplementary_material [file attachment]

Synthetic, batch size 8, D=864, 18 layers, L=2<sup>14</sup>

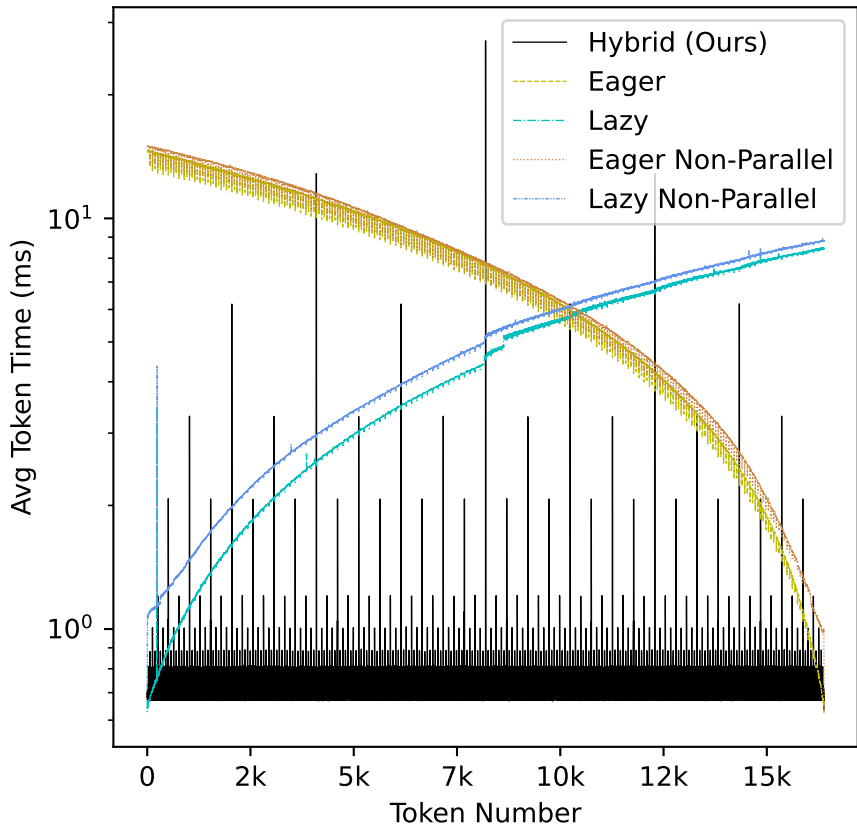

Supplement: supplementary_material [file attachment]

Synthetic, batch size 8, D=768, 18 layers, L=2<sup>14</sup>

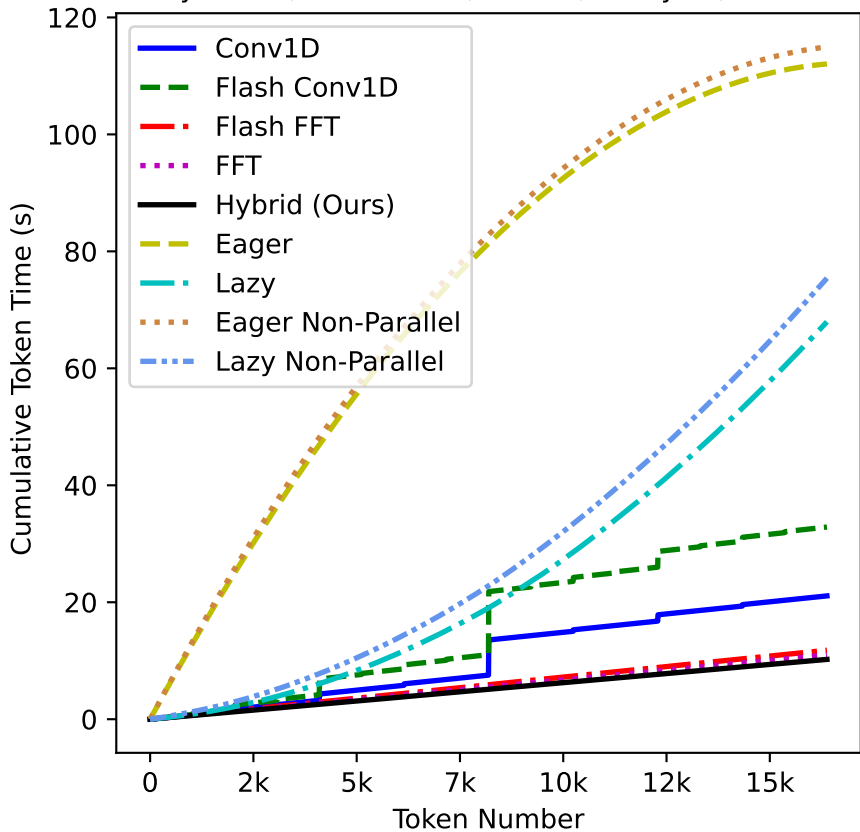

Supplement: supplementary_material [file attachment]

Hyena, batch size 2, D=864, 36 layers, L=2<sup>15</sup>

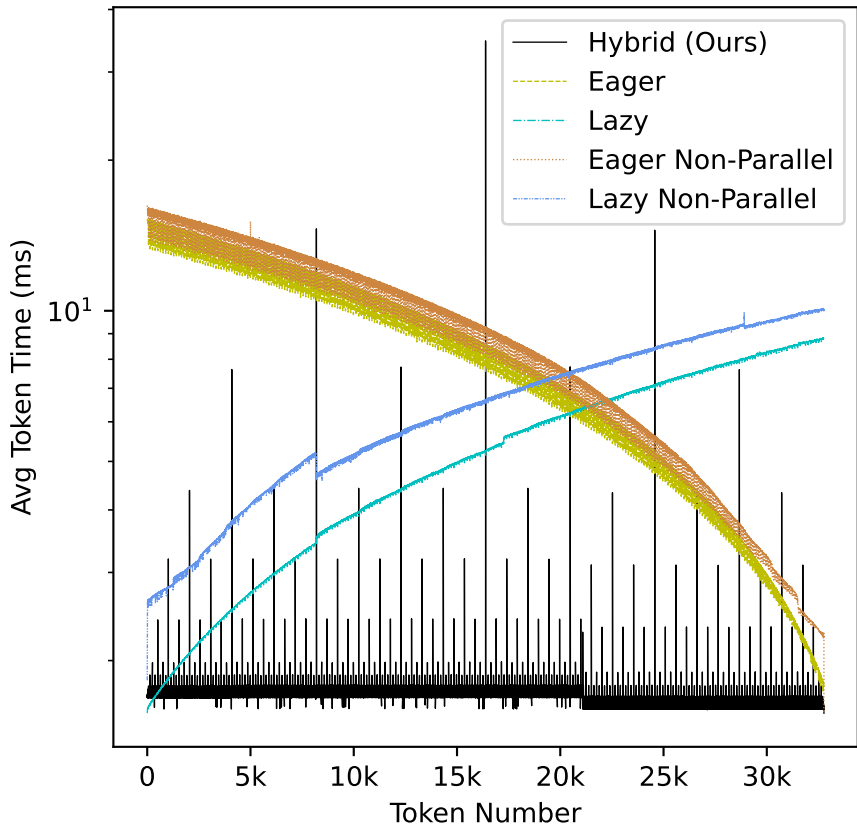

Supplement: supplementary_material [file attachment]

Convolution-part for batch size 2, D=256, 36 layers, L=2<sup>16</sup>

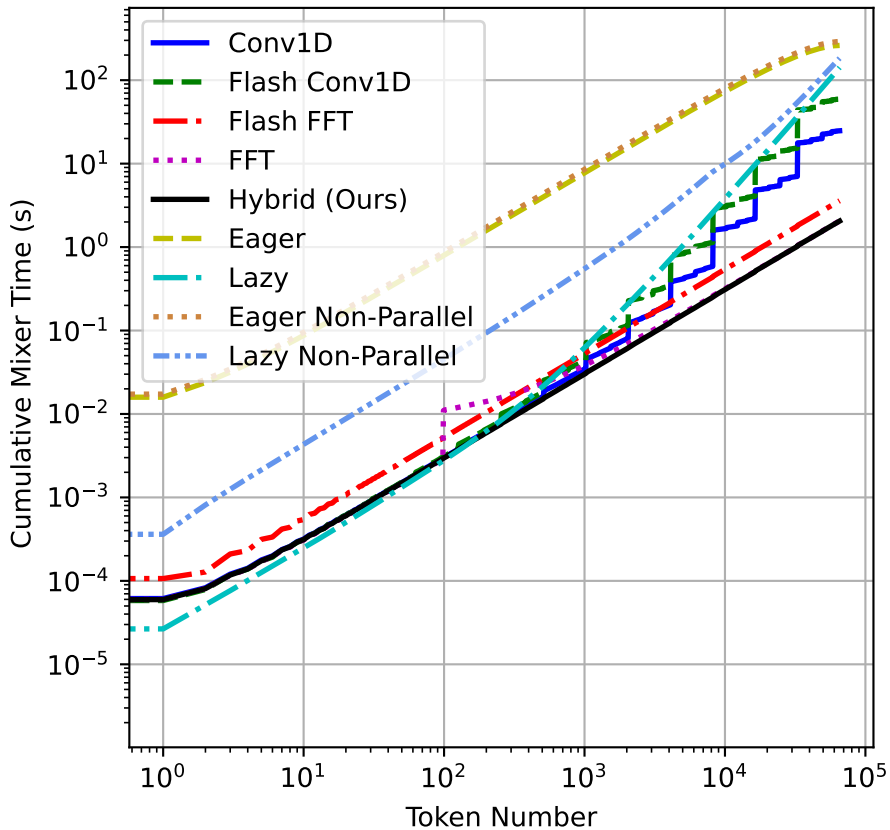

Supplement: supplementary_material [file attachment]

Synthetic, batch size 2, D=256, 36 layers, L=2<sup>16</sup>

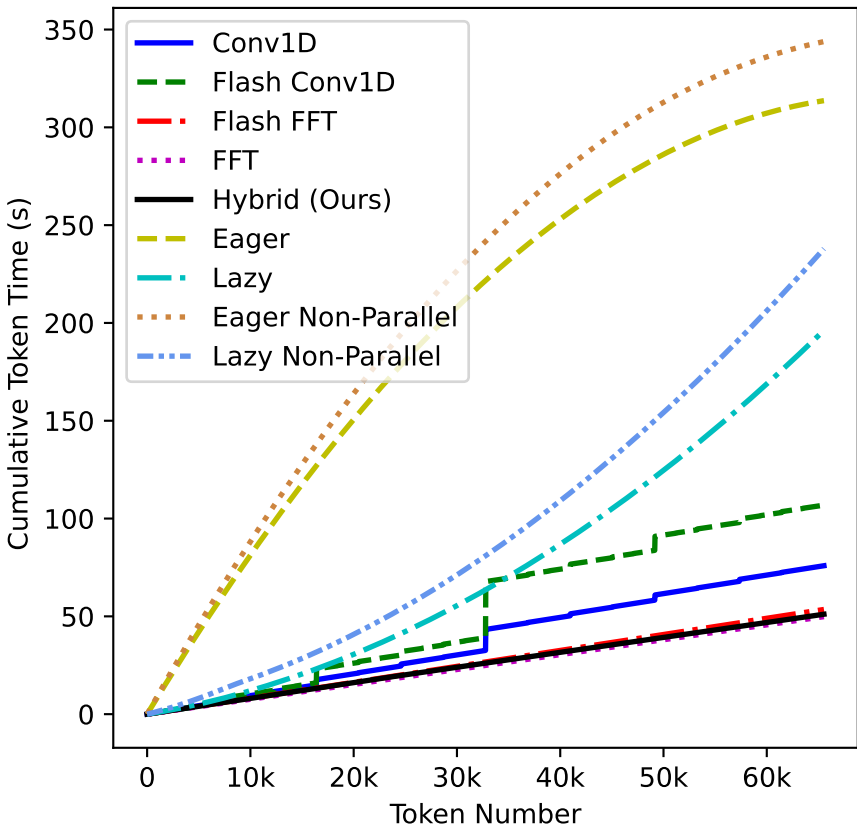

Supplement: supplementary_material [file attachment]

Hyena, batch size 1, D=256, 36 layers, L=2<sup>17</sup>

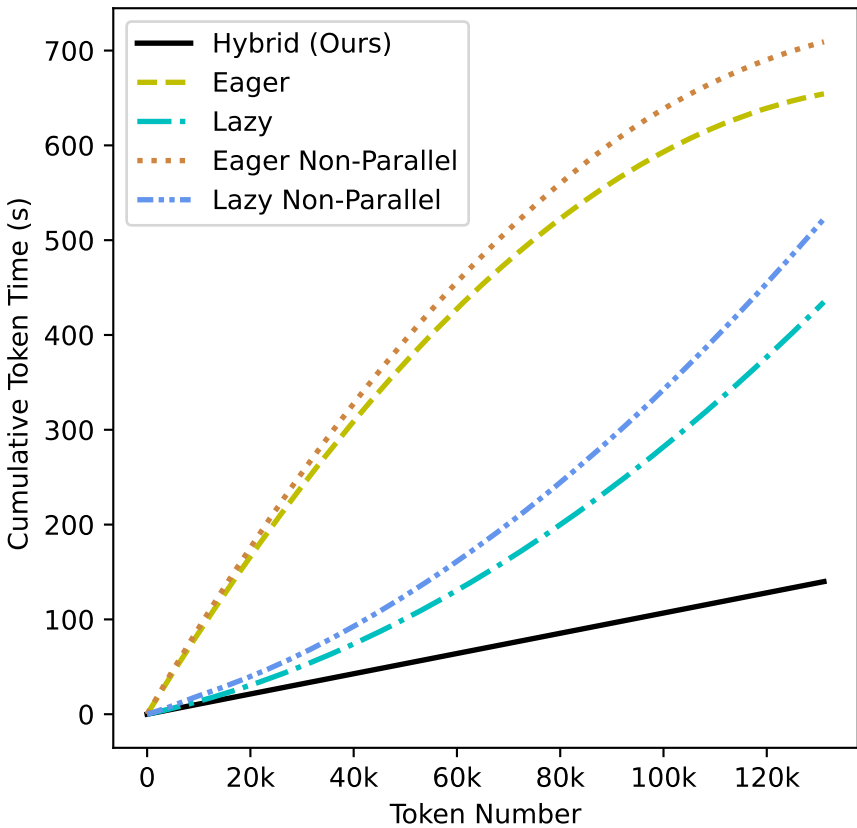

Supplement: supplementary_material [file attachment]

Convolution-part for batch size 2, D=768, 18 layers, L= $2^{16}$

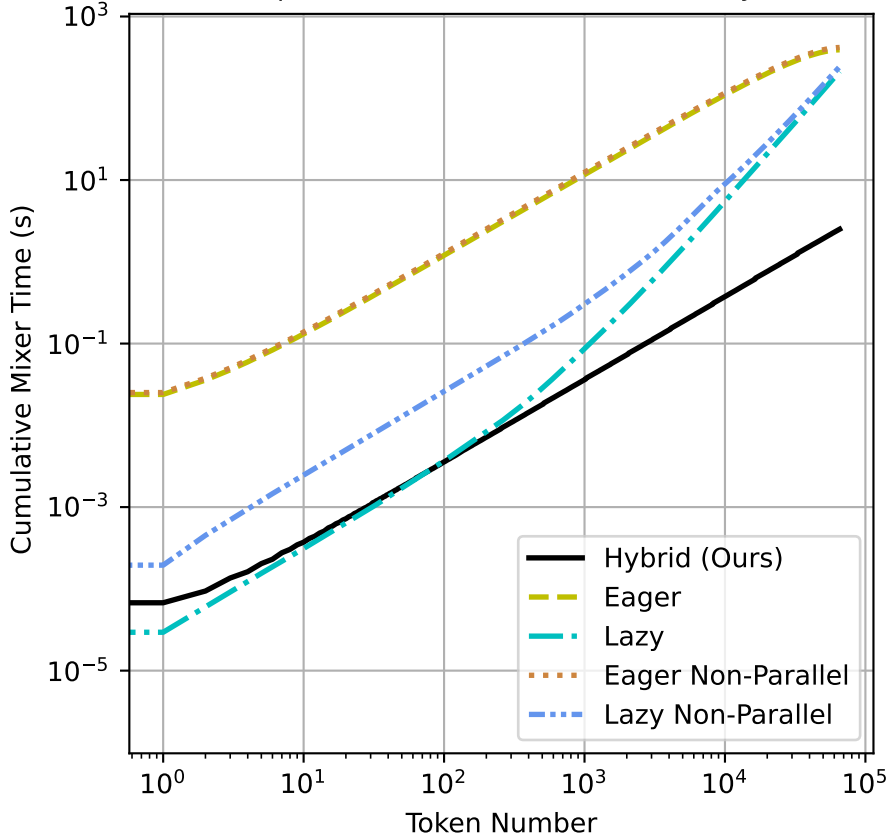

Supplement: supplementary_material [file attachment]

Synthetic, batch size 4, D=768, 36 layers, L=2<sup>14</sup>

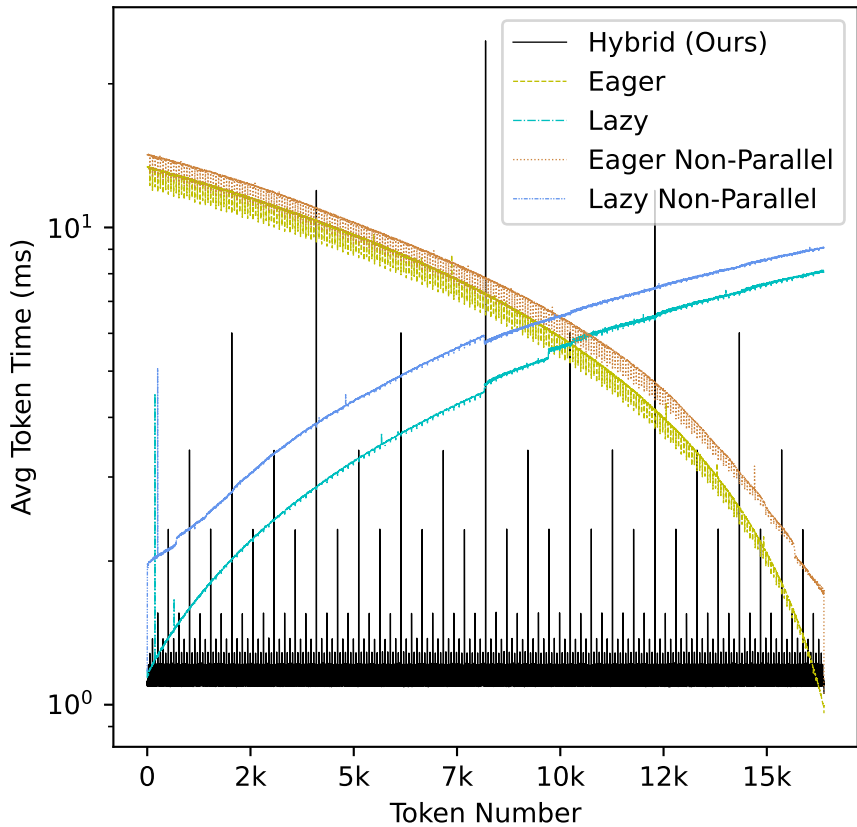

Supplement: supplementary_material [file attachment]

Hyena, batch size 8, D=768, 18 layers, L=2<sup>14</sup>

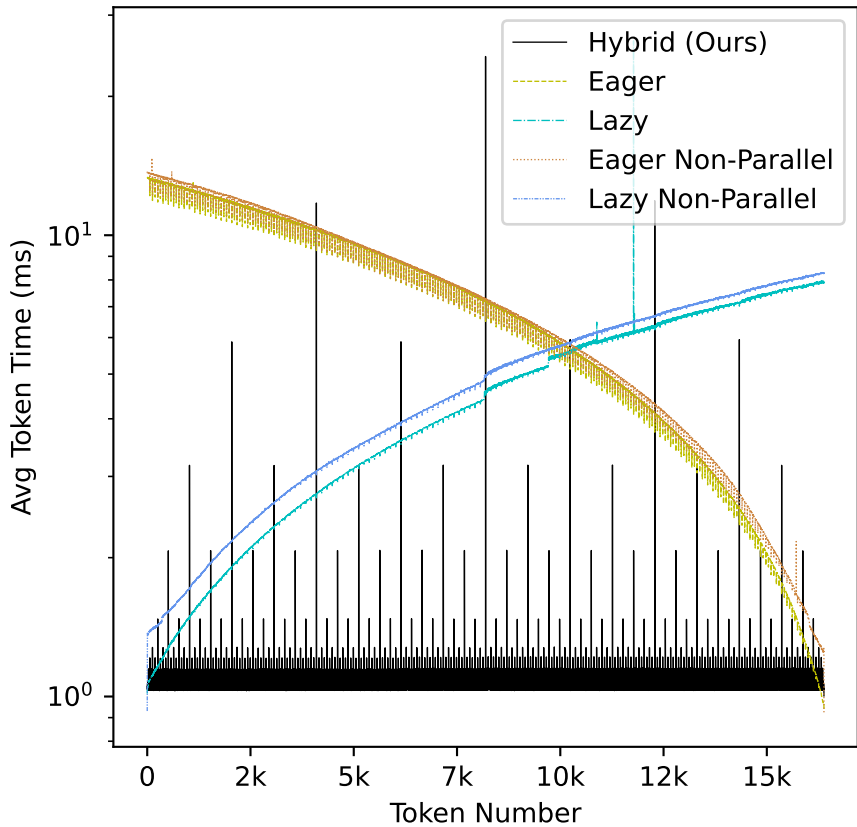

Supplement: supplementary_material [file attachment]

Hyena, batch size 2, D=864, 36 layers, L=2<sup>15</sup>

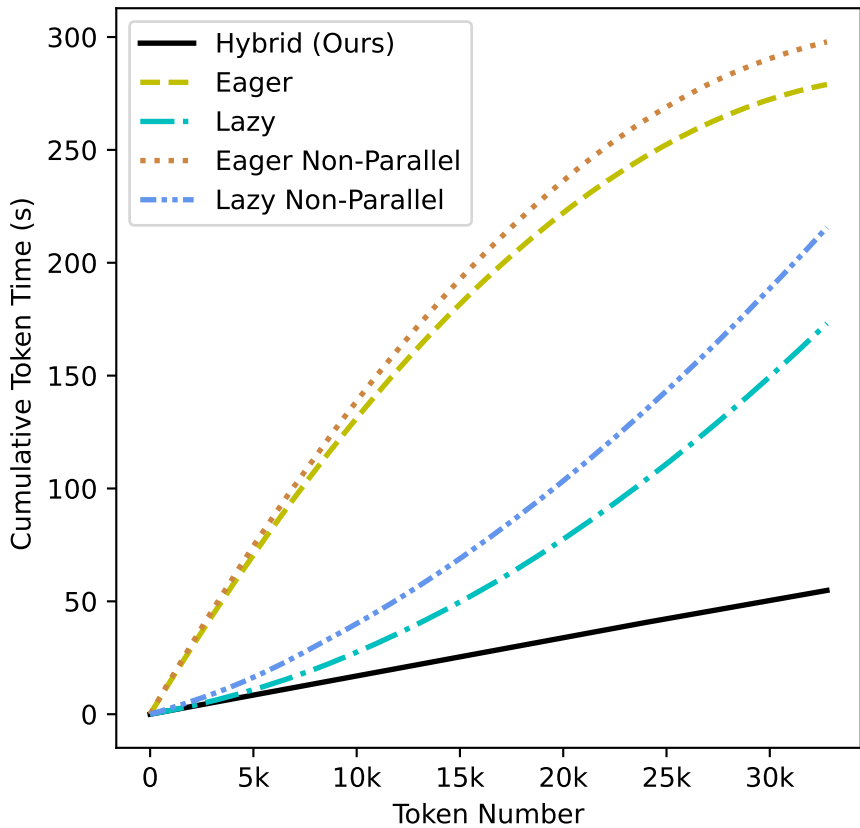

Supplement: supplementary_material [file attachment]

Hyena, batch size 2, D=864, 18 layers, L=2<sup>16</sup>

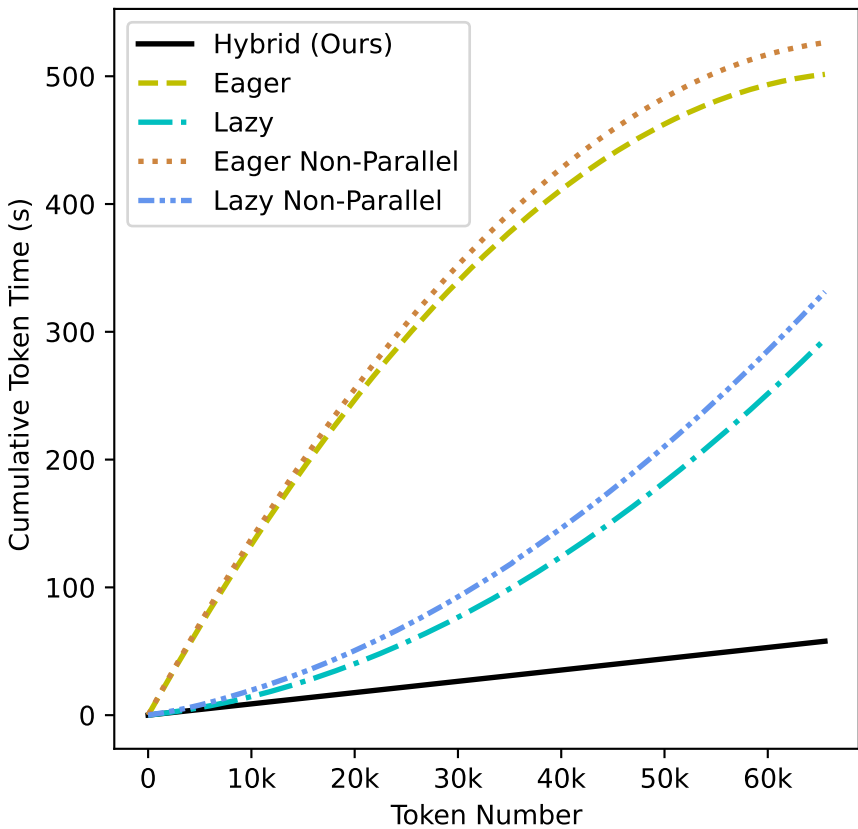

Supplement: supplementary_material [file attachment]

Synthetic, batch size 2, D=768, 36 layers, L=2<sup>15</sup>

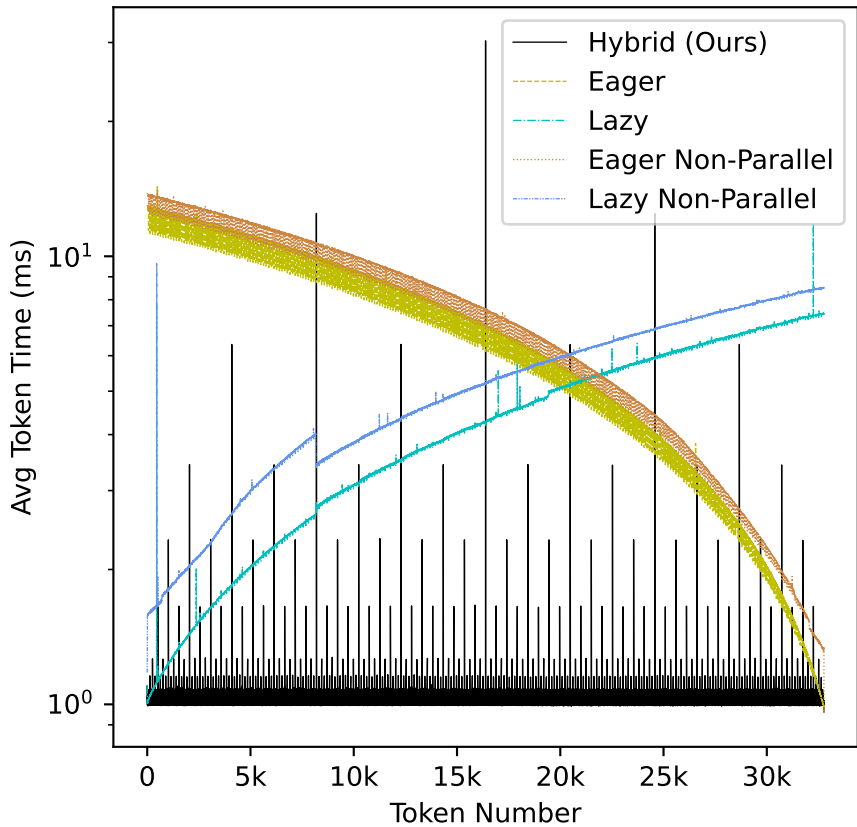

Supplement: supplementary_material [file attachment]

Convolution-part for batch size 4, D=768, 36 layers, L=2<sup>14</sup>

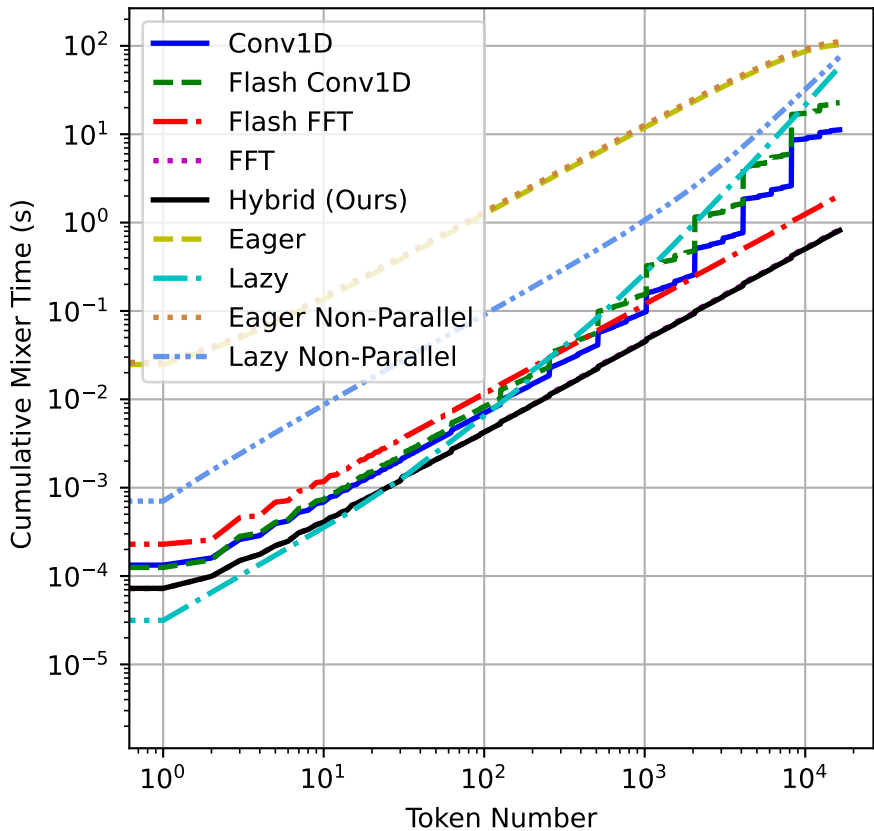

Supplement: supplementary_material [file attachment]

Convolution-part for batch size 2, D=768, 36 layers, L=2<sup>15</sup>

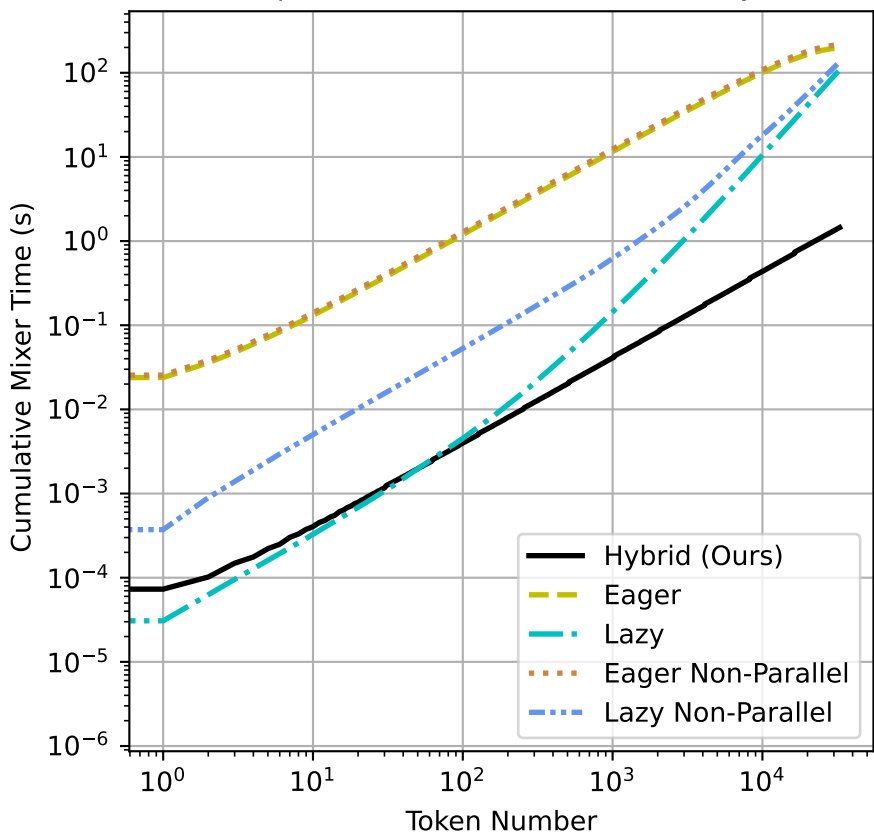

Supplement: supplementary_material [file attachment]

Convolution-part for batch size 8, D=864, 18 layers, L=2<sup>14</sup>

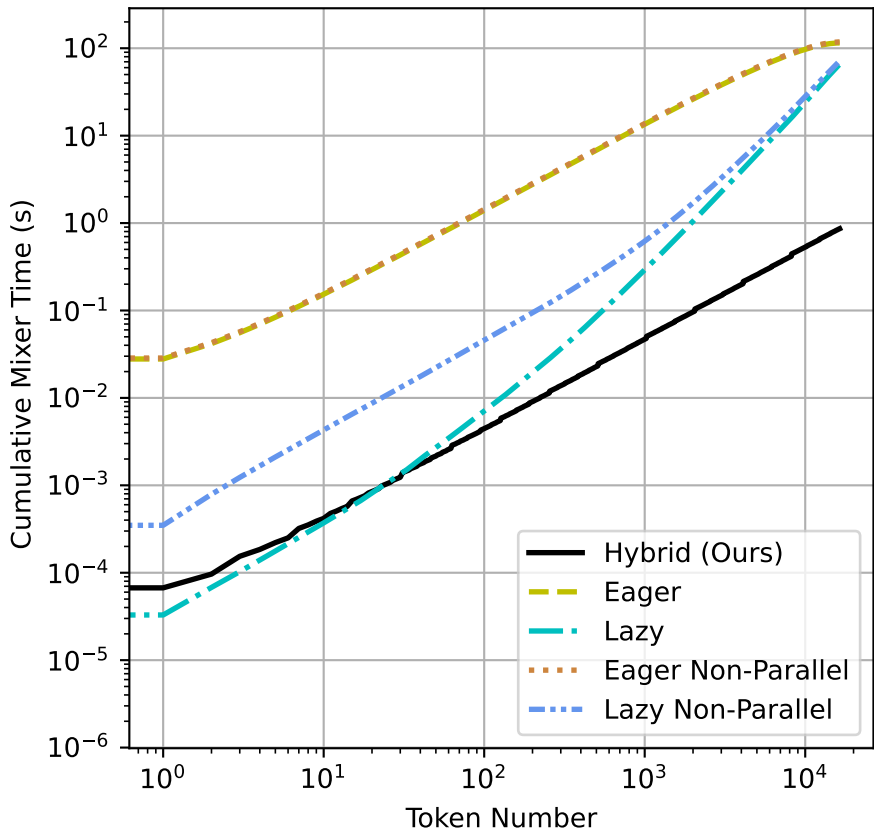

Supplement: supplementary_material [file attachment]

Convolution-part for batch size 4, D=768, 18 layers, L=2<sup>15</sup>

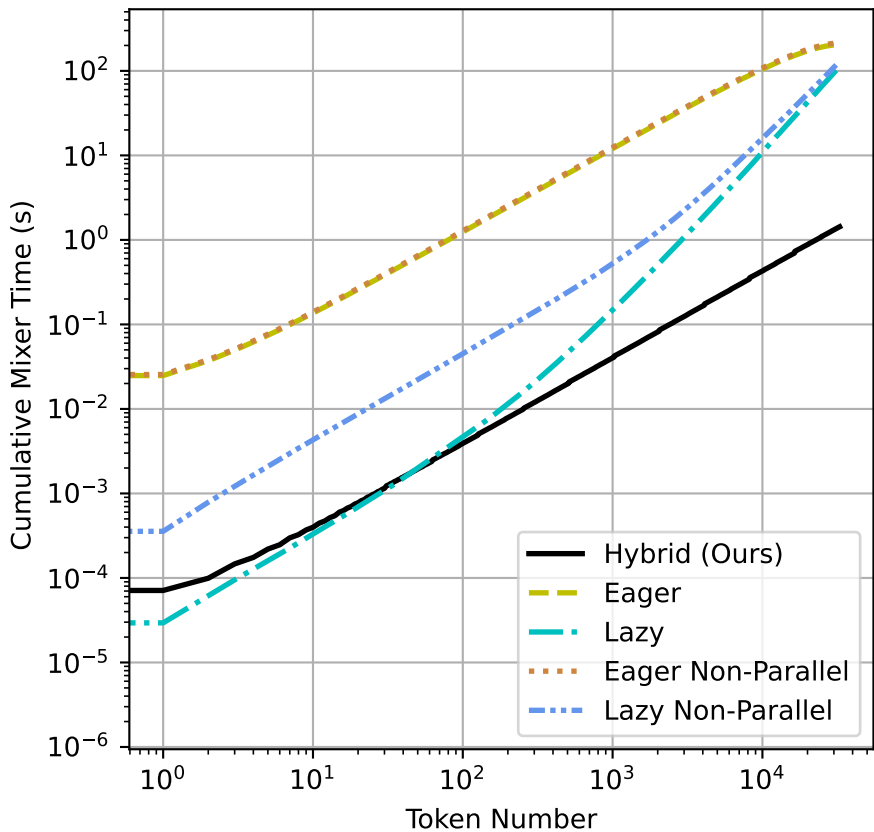

Supplement: supplementary_material [file attachment]

Convolution-part for batch size 1, D=256, 18 layers, L=2<sup>18</sup>

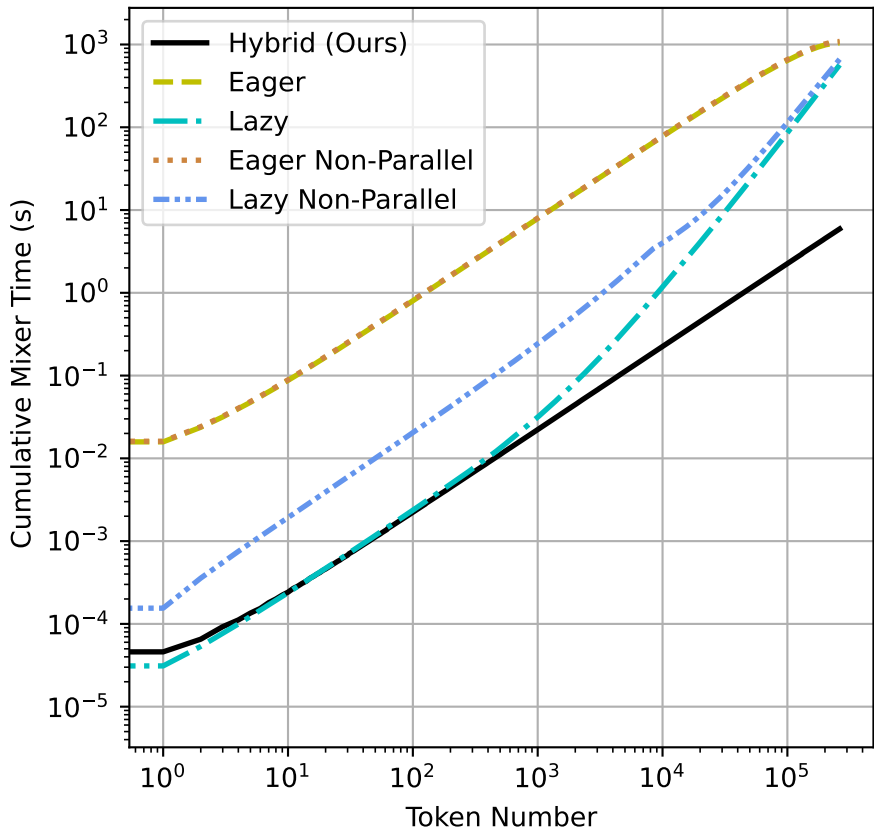

Supplement: supplementary_material [file attachment]

Convolution-part for batch size 8, D=768, 18 layers, L=2<sup>14</sup>

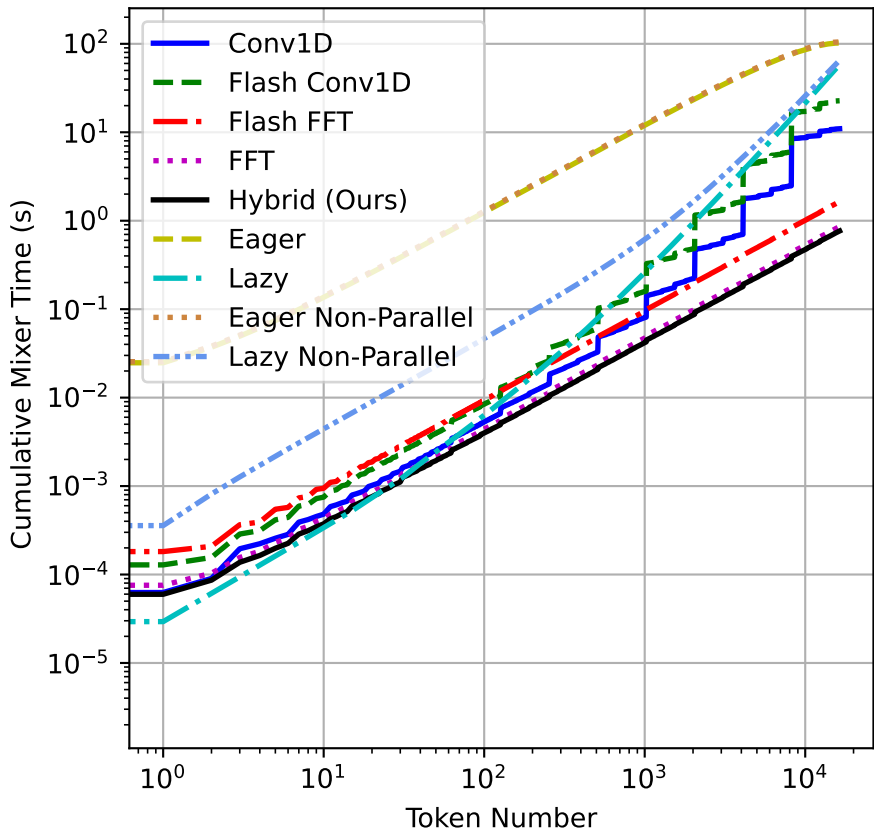

Supplement: supplementary_material [file attachment]

Hyena, batch size 4, D=256, 36 layers, L=2<sup>15</sup>

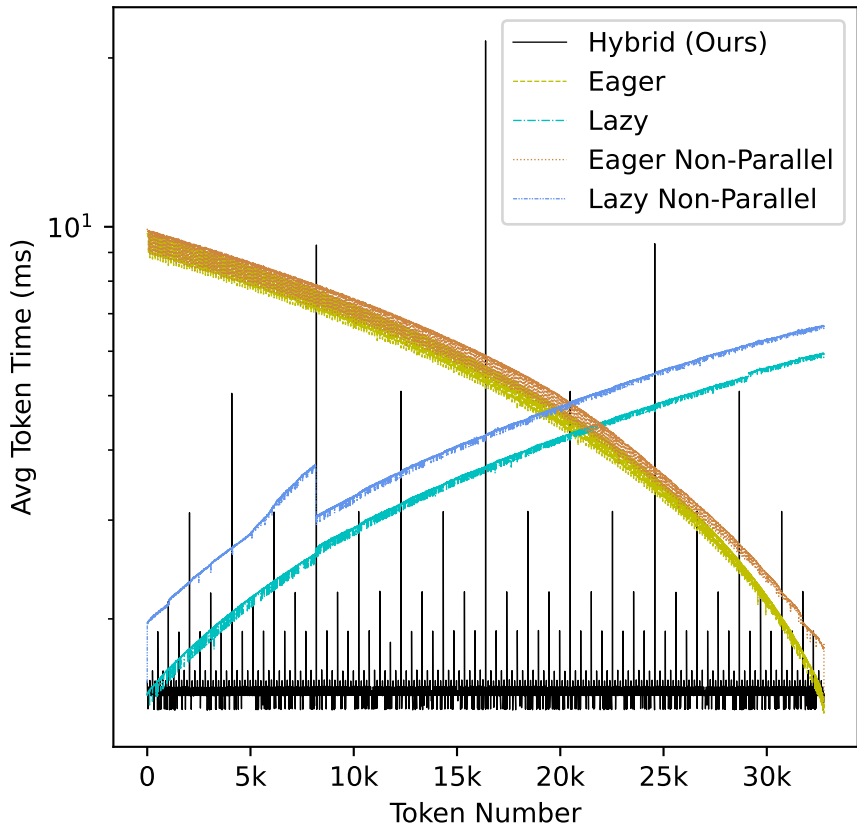

Supplement: supplementary_material [file attachment]

Hyena, batch size 1, D=864, 18 layers, L=2<sup>17</sup>

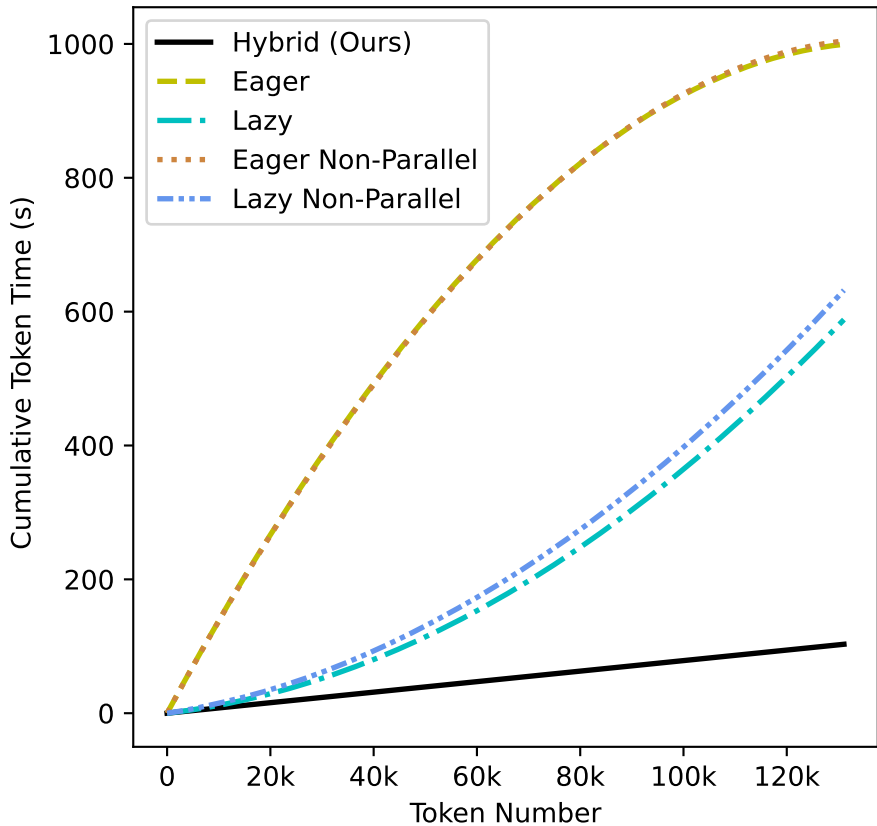

Supplement: supplementary_material [file attachment]

Convolution-part for batch size 2, D=864, 36 layers, L=2<sup>15</sup>

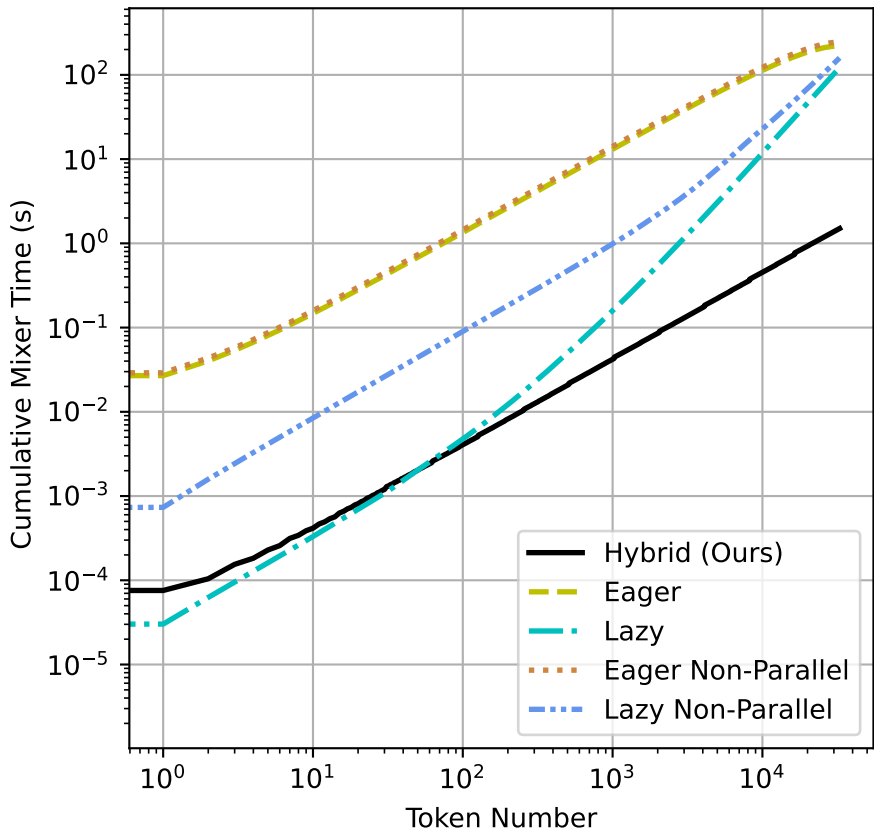

Supplement: supplementary_material [file attachment]

Hyena, batch size 2, D=256, 18 layers, L=2<sup>17</sup>

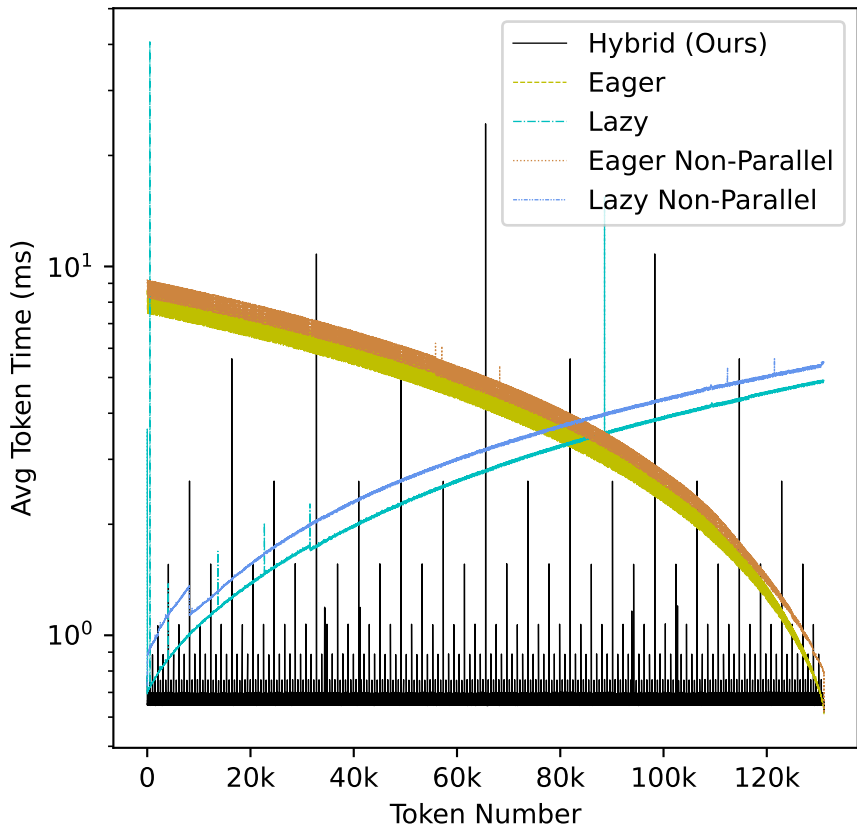

Supplement: supplementary_material [file attachment]

Hyena, batch size 4, D=256, 18 layers, L=2<sup>16</sup>

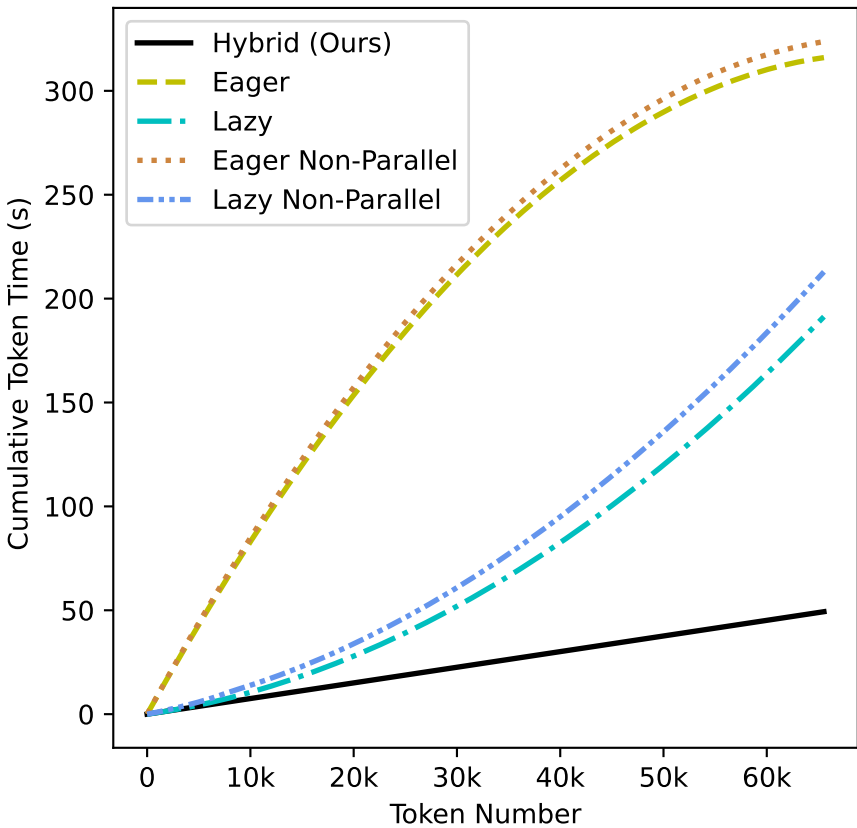

Supplement: supplementary_material [file attachment]

Hyena, batch size 1, D=768, 18 layers, L=2<sup>17</sup>

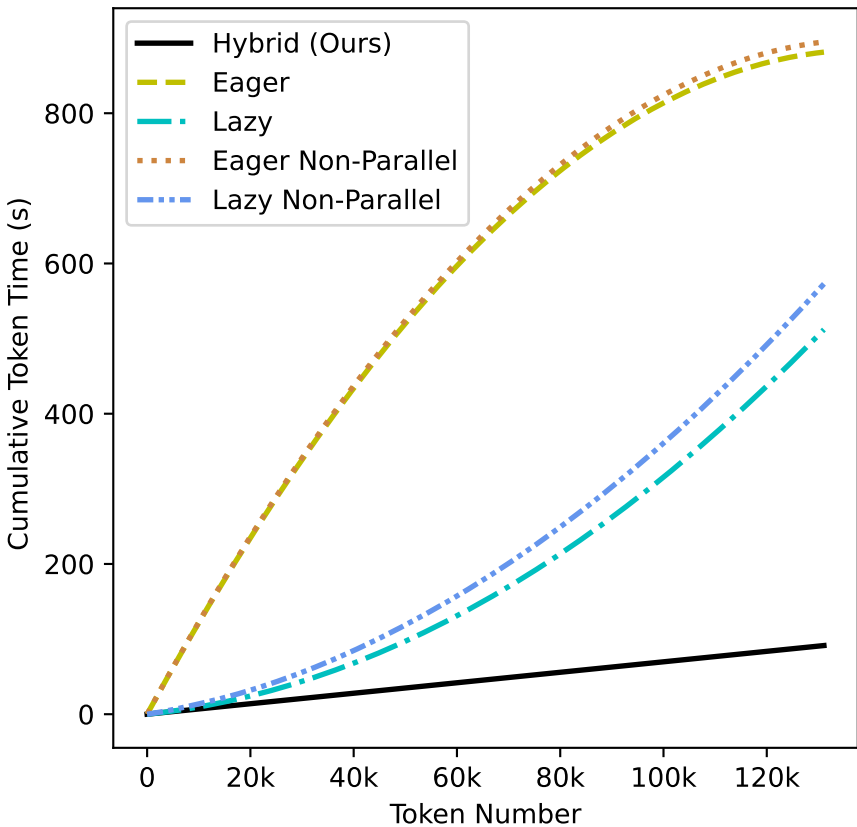

Supplement: supplementary_material [file attachment]

Synthetic, batch size 2, D=768, 18 layers, L=2<sup>16</sup>

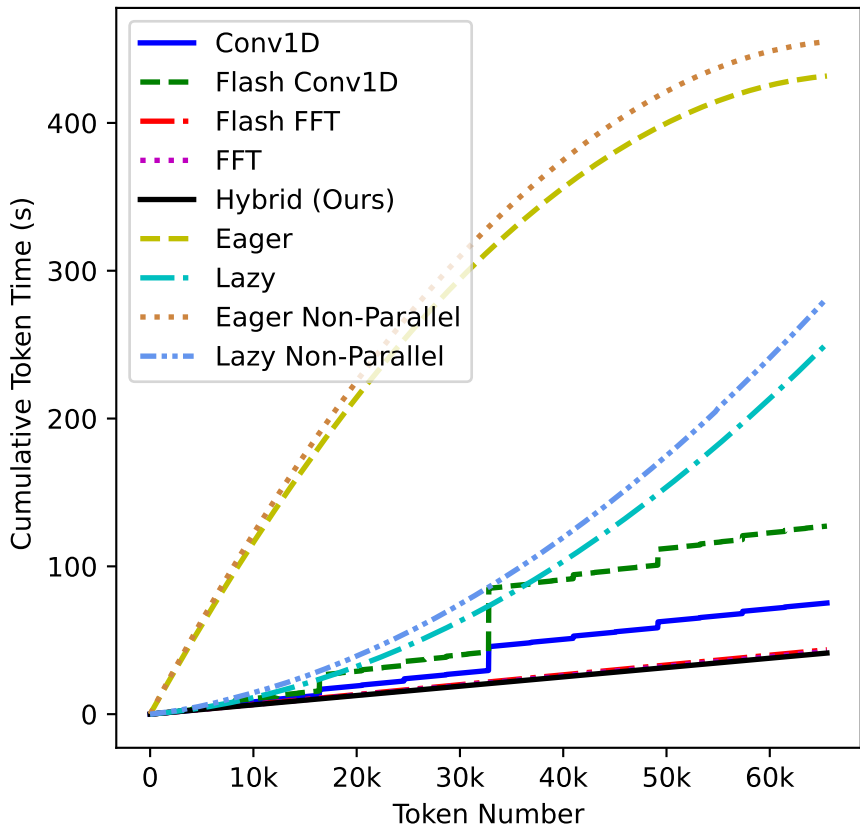

Supplement: supplementary_material [file attachment]

Hyena, batch size 1, D=768, 36 layers, L=2<sup>16</sup>

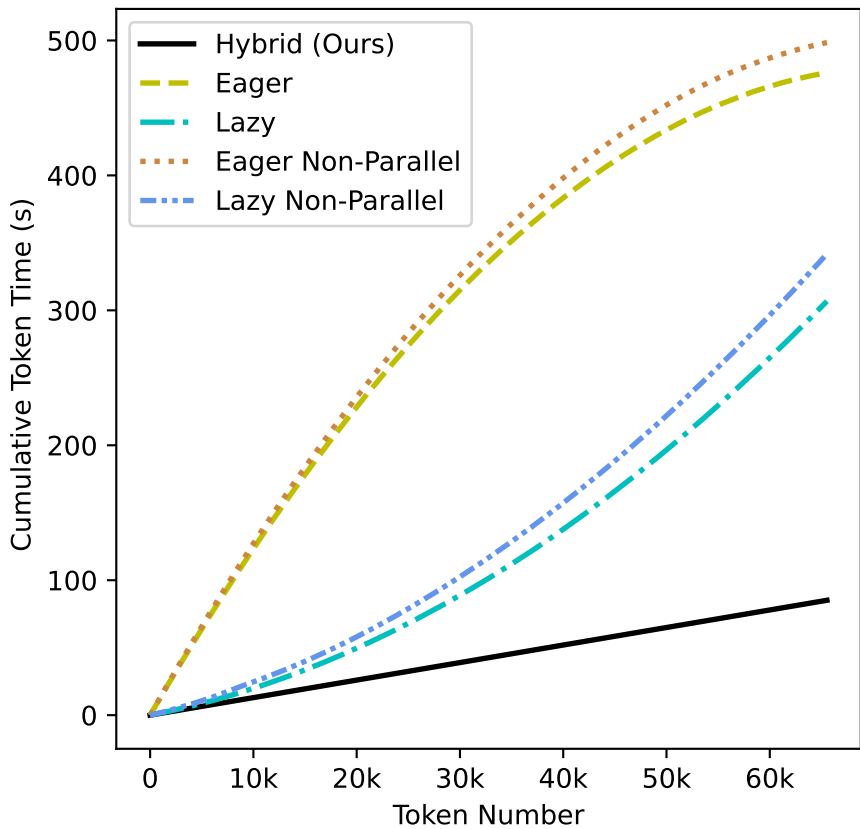

Supplement: supplementary_material [file attachment]

Hyena, batch size 2, D=256, 36 layers, L=2<sup>16</sup>

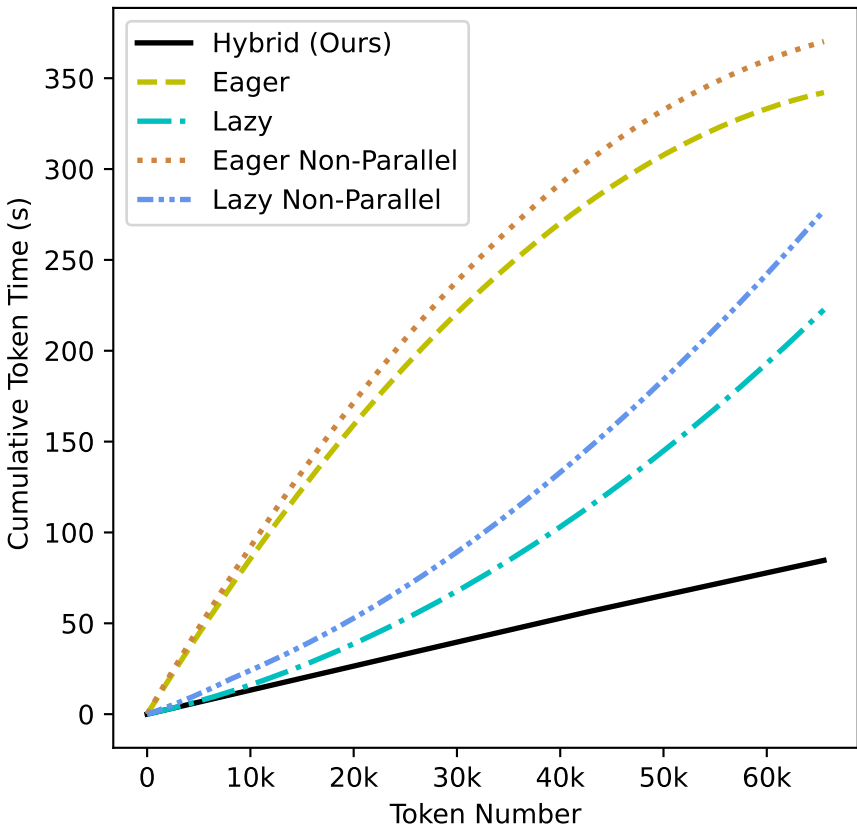

Supplement: supplementary_material [file attachment]

Synthetic, batch size 1, D=864, 18 layers, L=2<sup>17</sup>

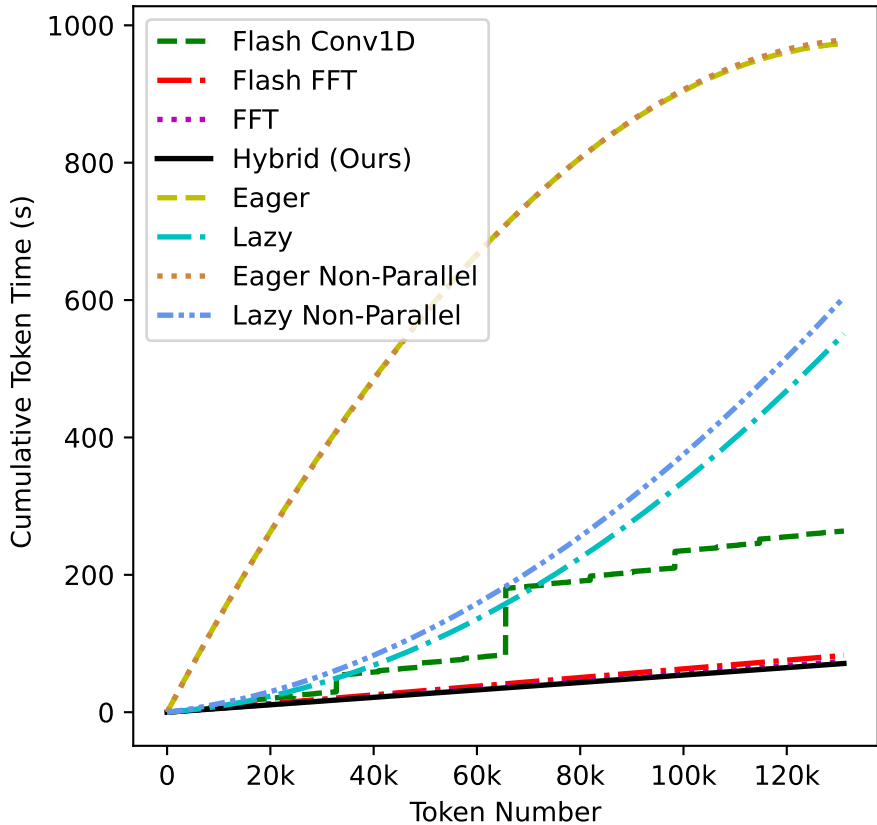

Supplement: supplementary_material [file attachment]

Hyena, batch size 4, D=768, 18 layers, L=2<sup>15</sup>

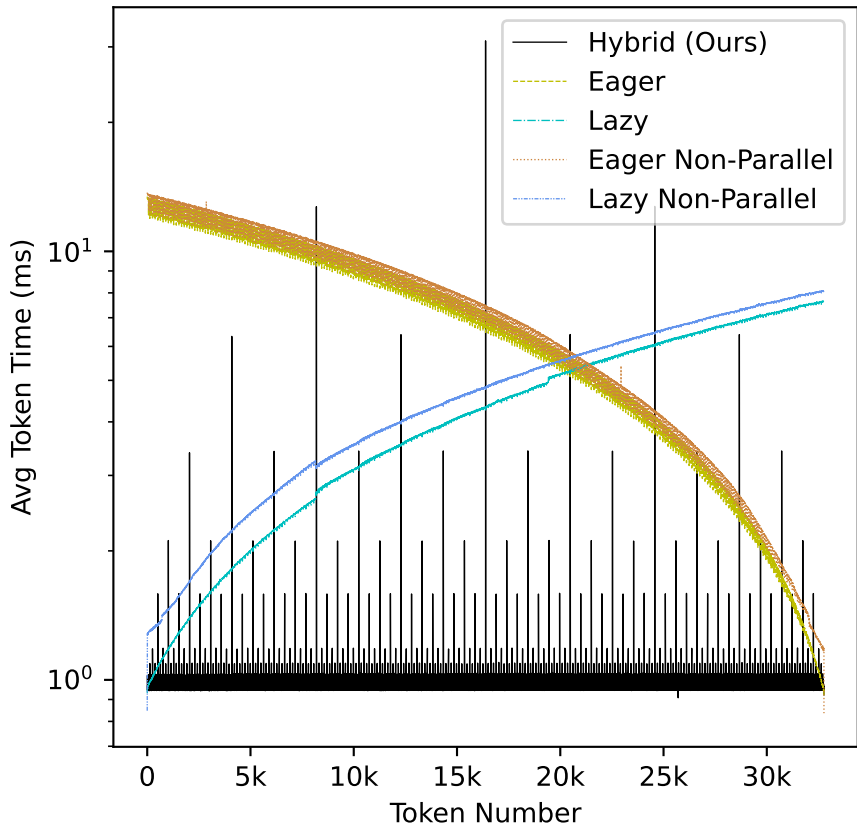

Supplement: supplementary_material [file attachment]

Synthetic, batch size 2, D=864, 18 layers, L=2<sup>16</sup>

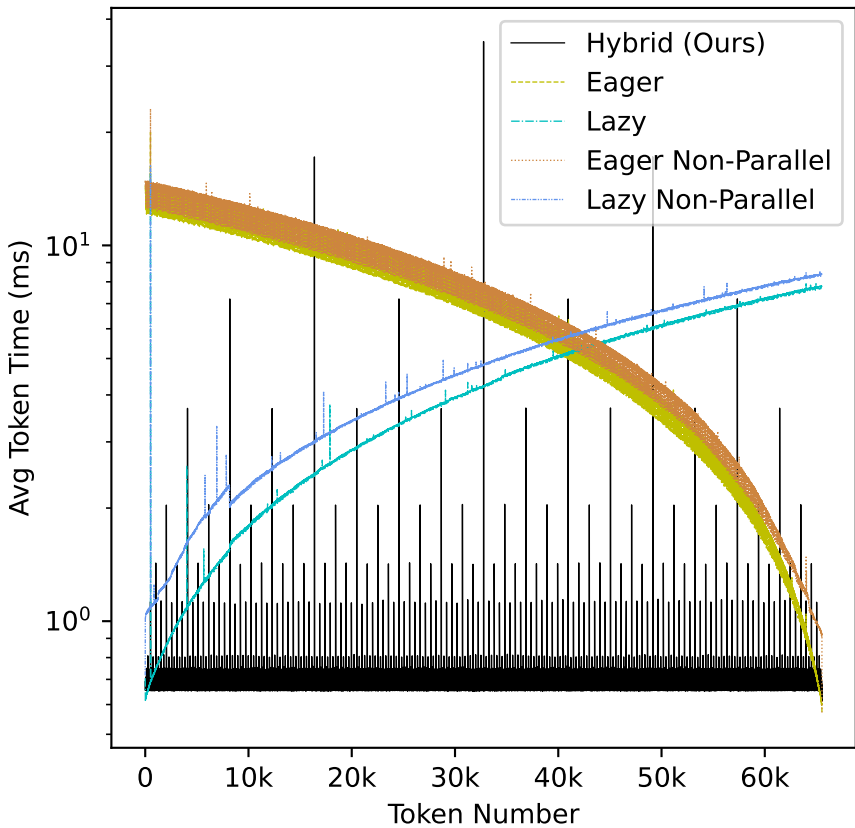

Supplement: supplementary_material [file attachment]

Synthetic, batch size 1, D=256, 18 layers, L=2<sup>18</sup>

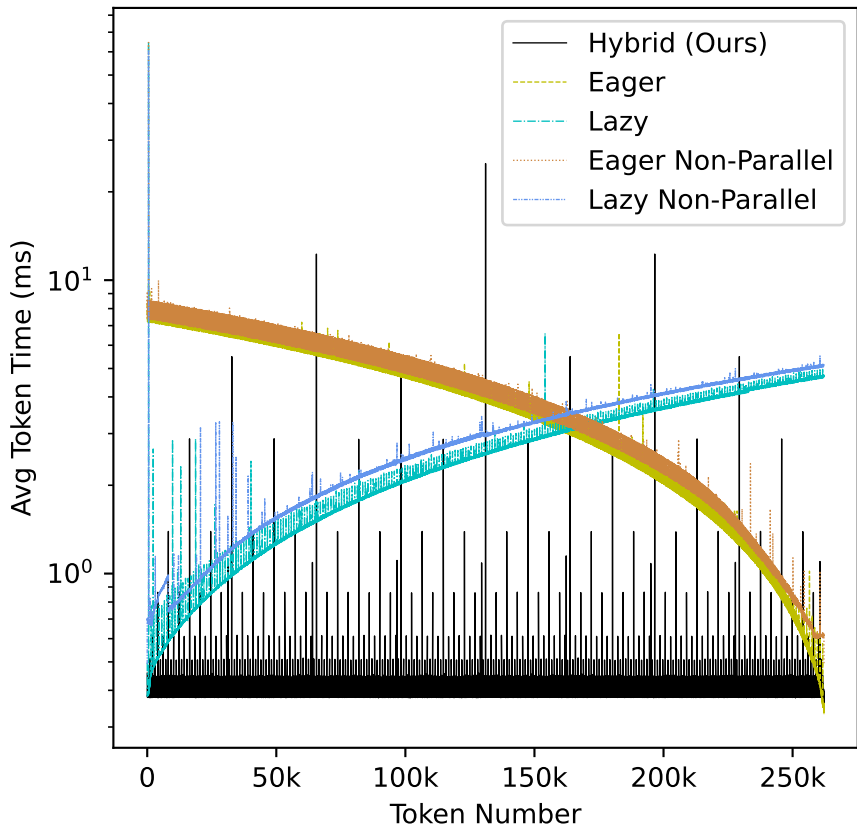

Supplement: supplementary_material [file attachment]

Convolution-part for batch size 1, D=768, 36 layers, L= $2^{16}$

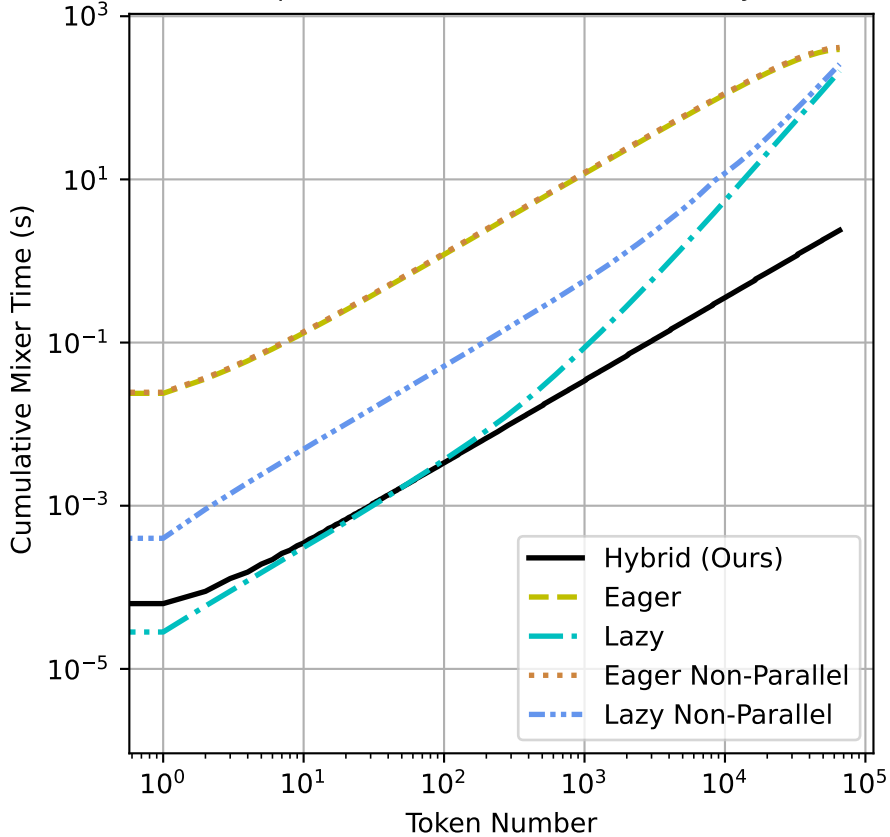

Supplement: supplementary_material [file attachment]

Hyena, batch size 4, D=768, 36 layers, L=2<sup>14</sup>

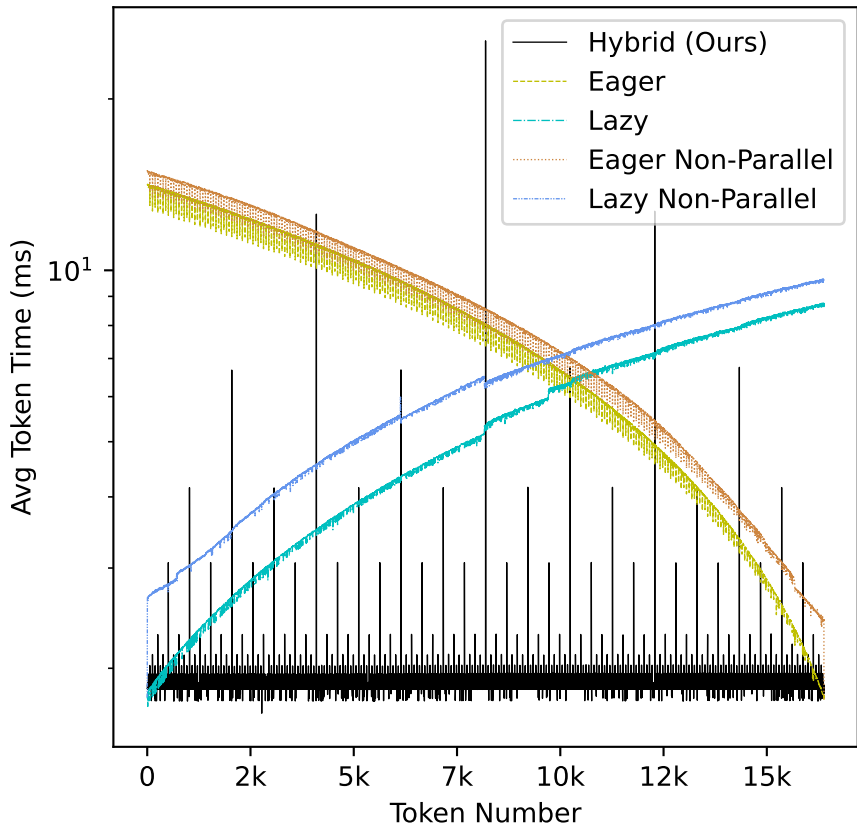

Supplement: supplementary_material [file attachment]

Synthetic, batch size 1, D=768, 36 layers, L=2<sup>16</sup>

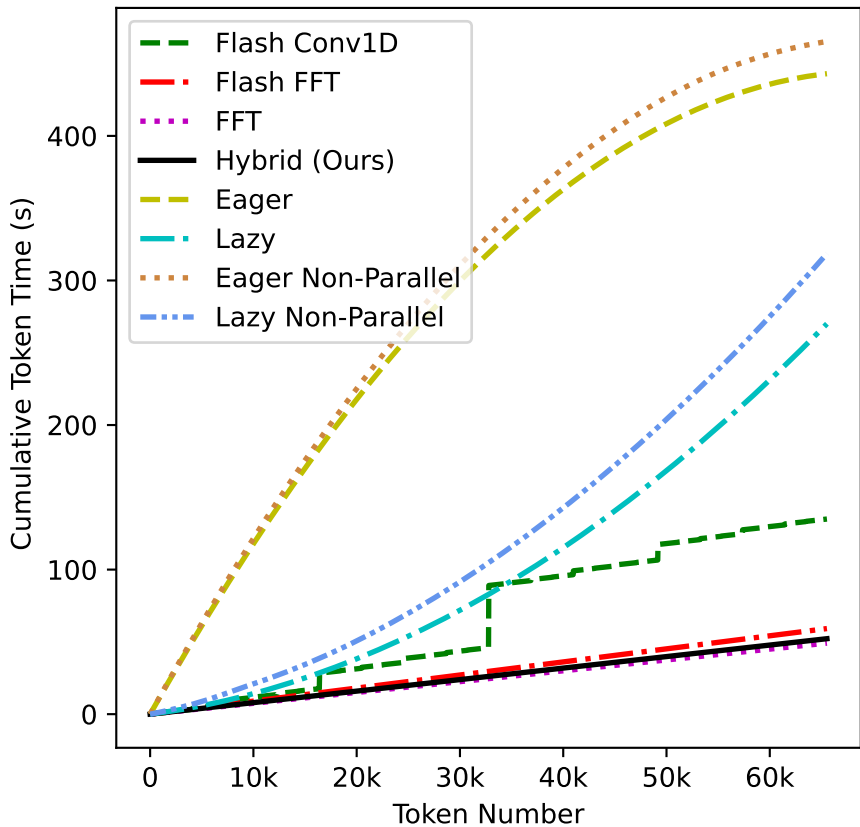

Supplement: supplementary_material [file attachment]

Convolution-part for batch size 2, D=256, 18 layers, L=2<sup>17</sup>

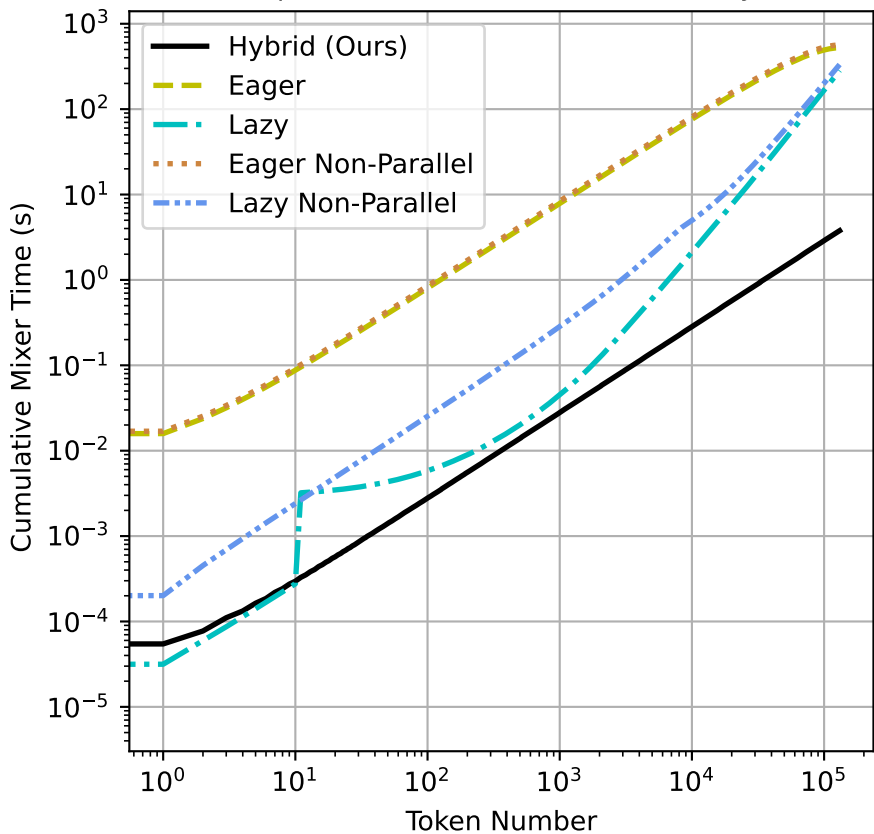

Supplement: supplementary_material [file attachment]

Synthetic, batch size 4, D=256, 36 layers, L=2<sup>15</sup>

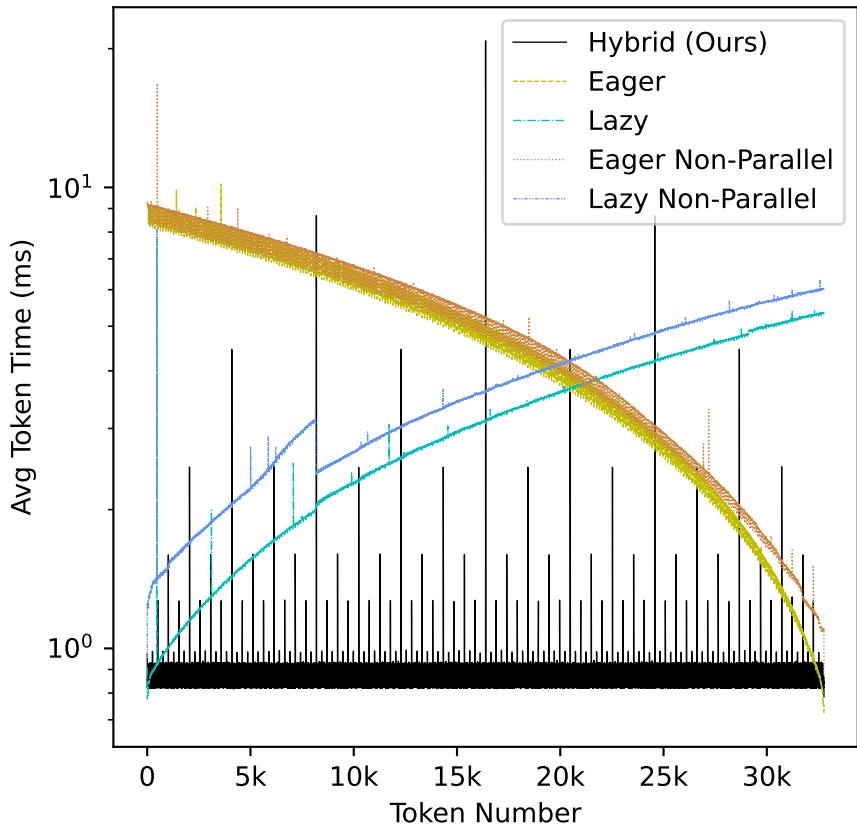

Supplement: supplementary_material [file attachment]

Convolution-part for batch size 1, D=768, 18 layers, L=2<sup>17</sup>

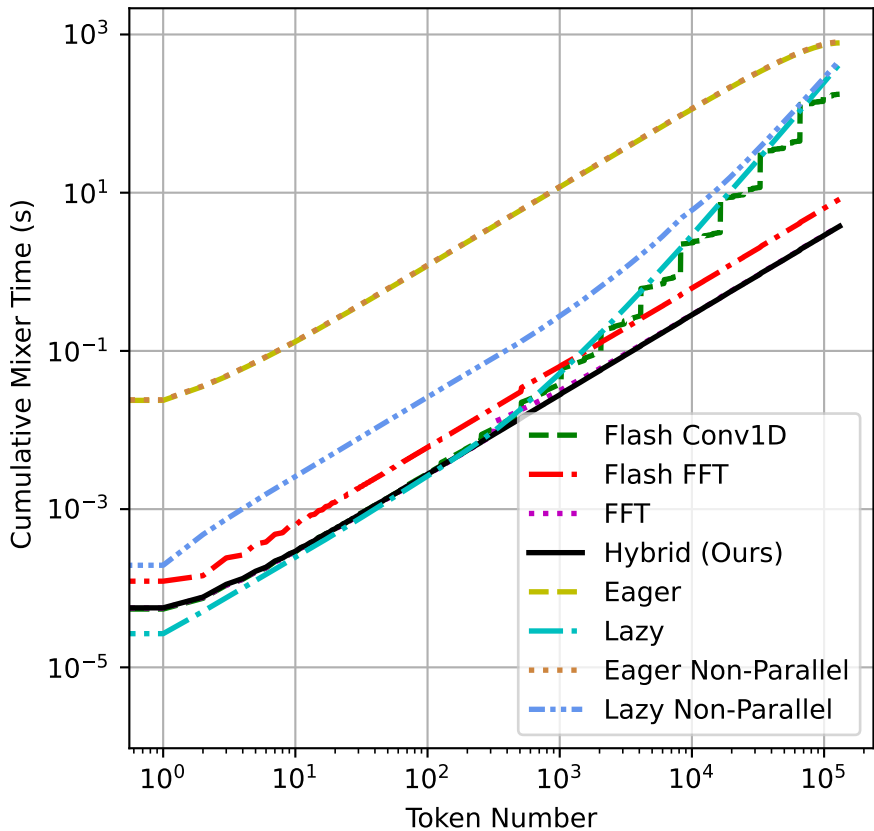

Supplement: supplementary_material [file attachment]

Convolution-part for batch size 1, D=256, 36 layers, L=2<sup>17</sup>

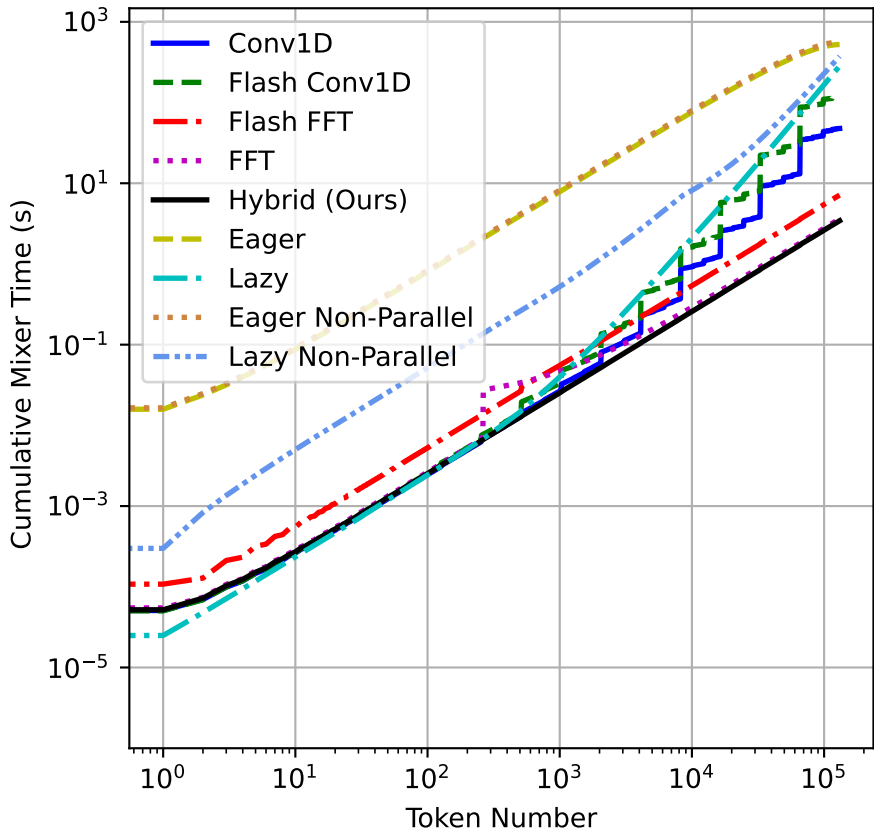

Supplement: supplementary_material [file attachment]

Synthetic, batch size 1, D=864, 18 layers, L=2<sup>17</sup>

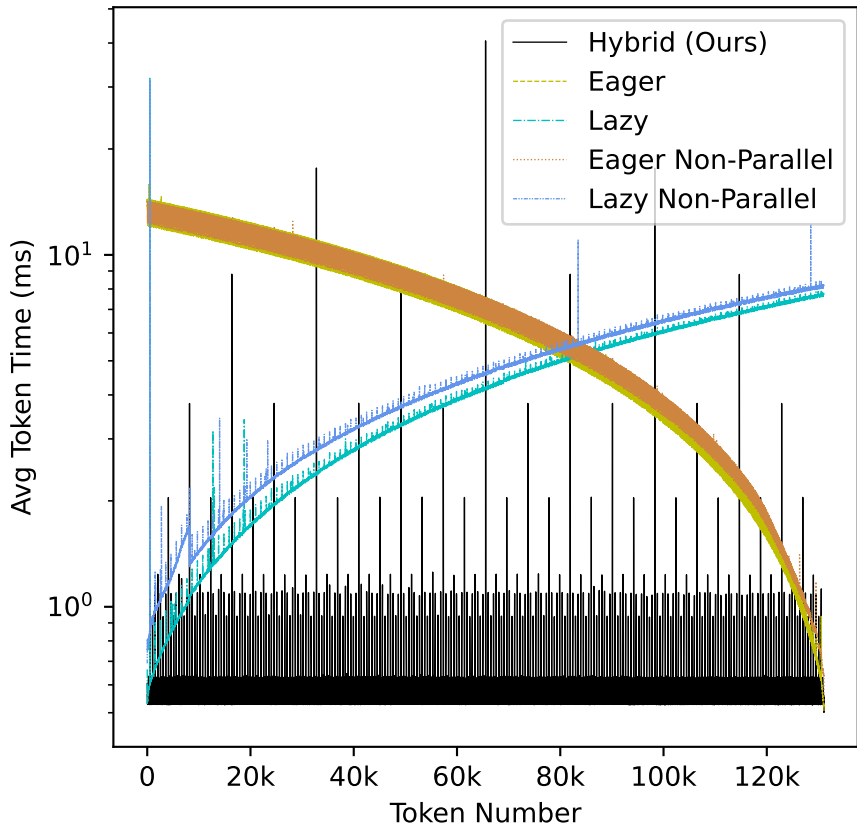

Supplement: supplementary_material [file attachment]

Hyena, batch size 1, D=864, 18 layers, L=2<sup>17</sup>

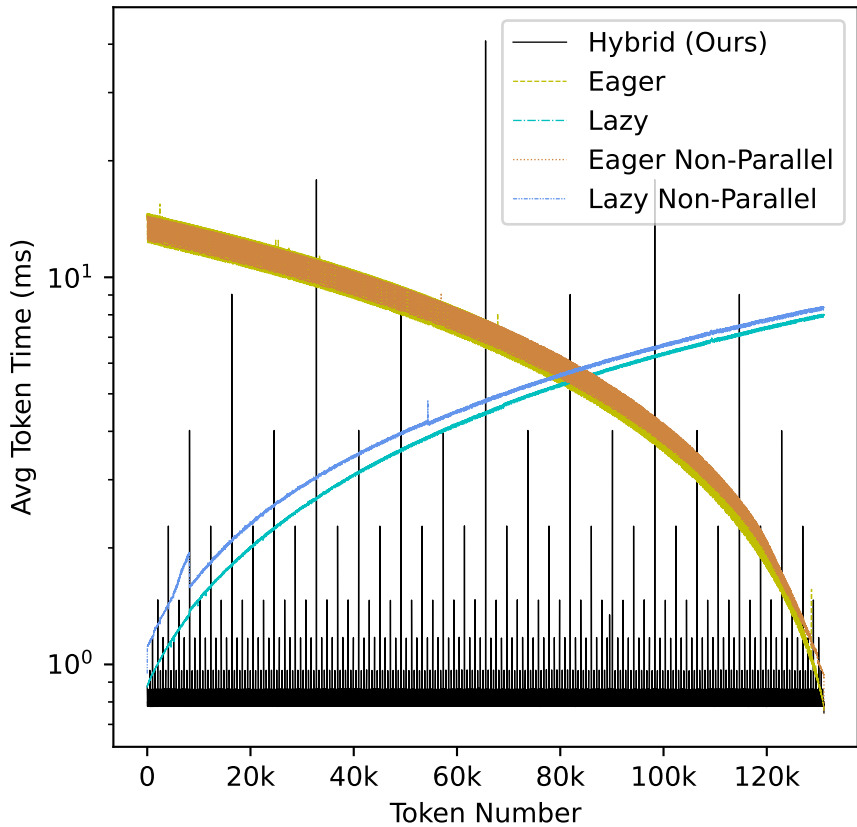

Supplement: supplementary_material [file attachment]

Synthetic, batch size 4, D=256, 18 layers, L=2<sup>16</sup>

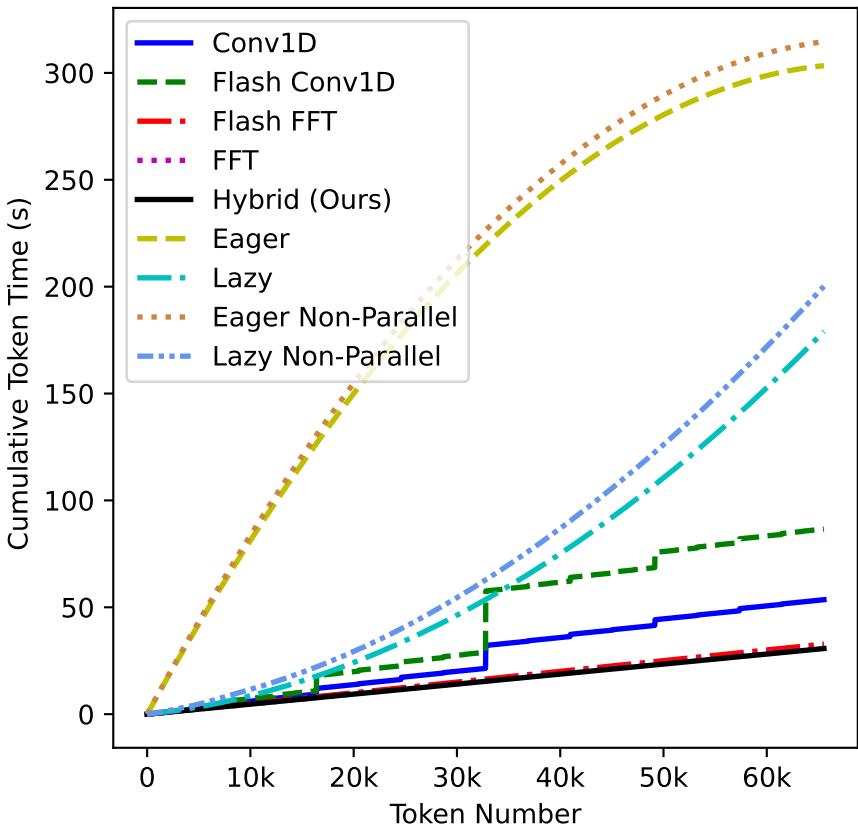

Supplement: supplementary_material [file attachment]

Convolution-part for batch size 1, D=864, 18 layers, L= $2^{17}$

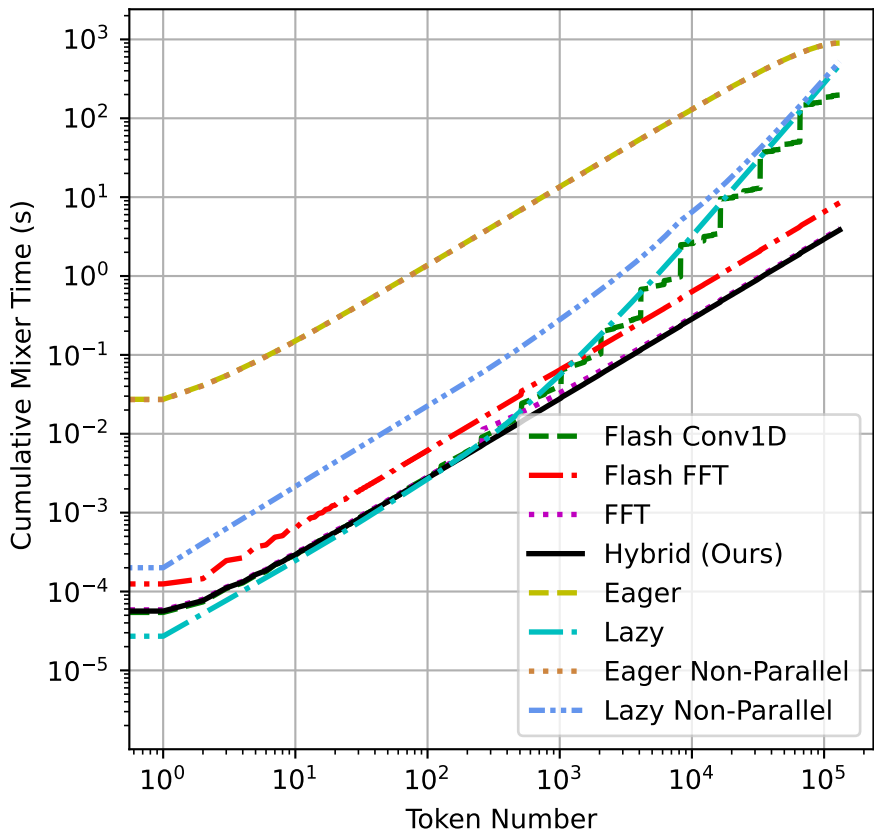

Supplement: supplementary_material [file attachment]

Synthetic, batch size 1, D=768, 18 layers, L=2<sup>17</sup>

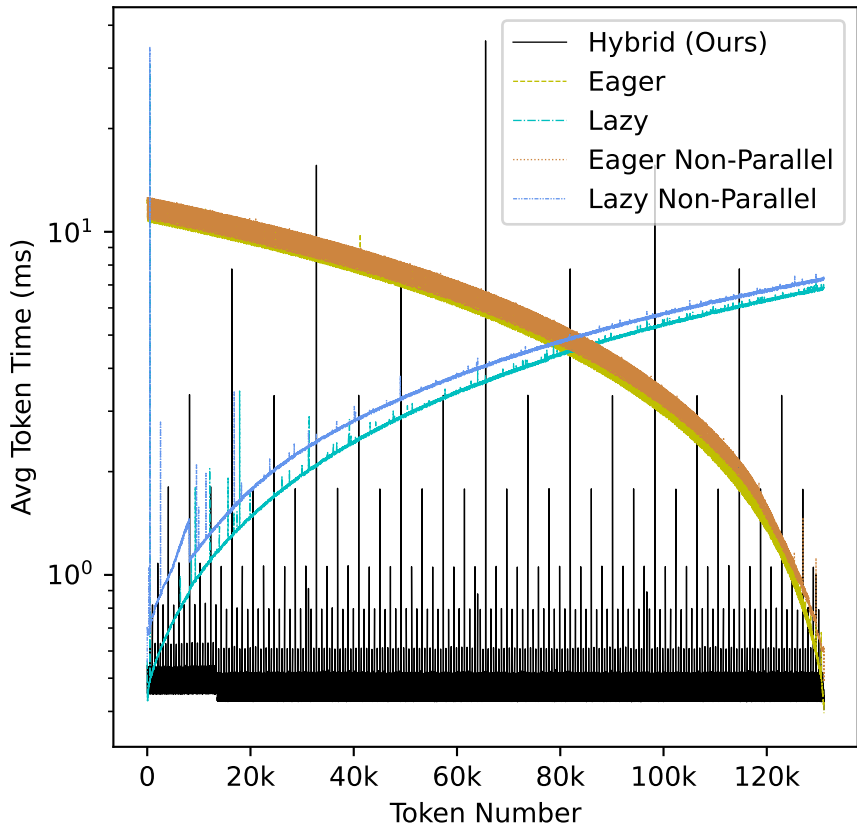

Supplement: supplementary_material [file attachment]

Convolution-part for batch size 4, D=256, 18 layers, L=2<sup>16</sup>

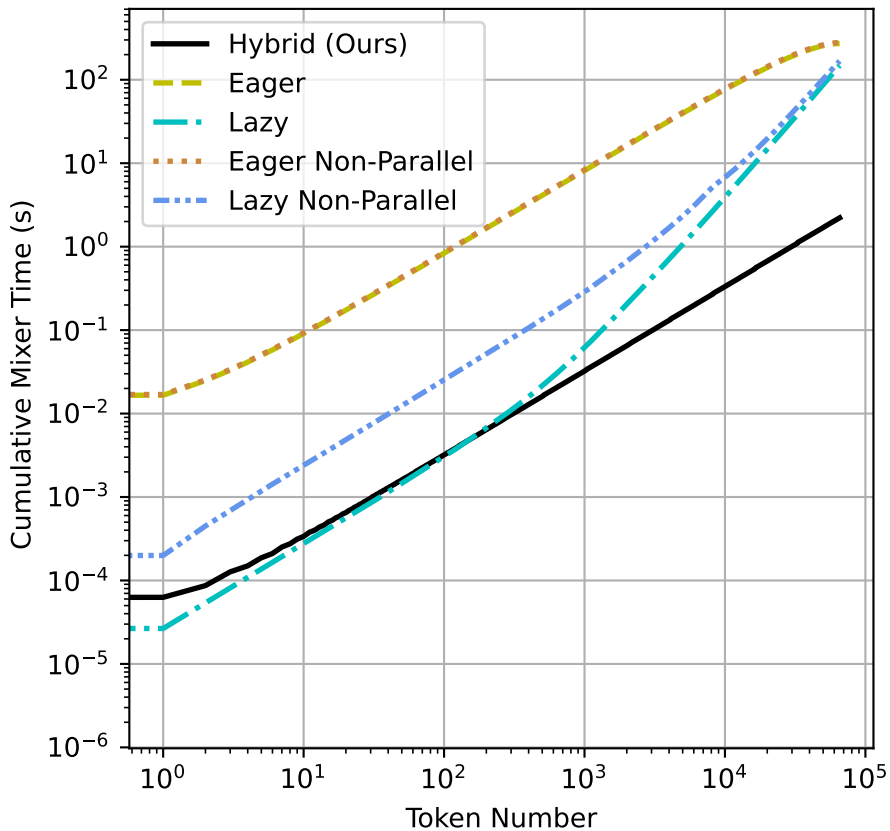

Supplement: supplementary_material [file attachment]

Synthetic, batch size 8, D=864, 18 layers, L=2<sup>14</sup>

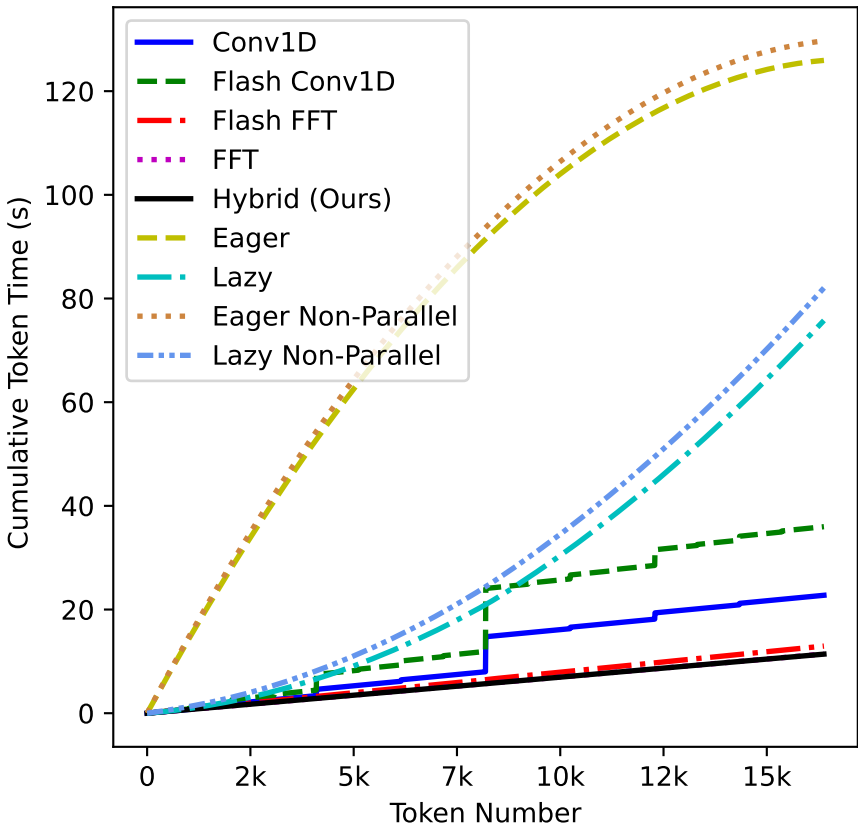

Supplement: supplementary_material [file attachment]

Hyena, batch size 4, D=768, 18 layers, L=2<sup>15</sup>

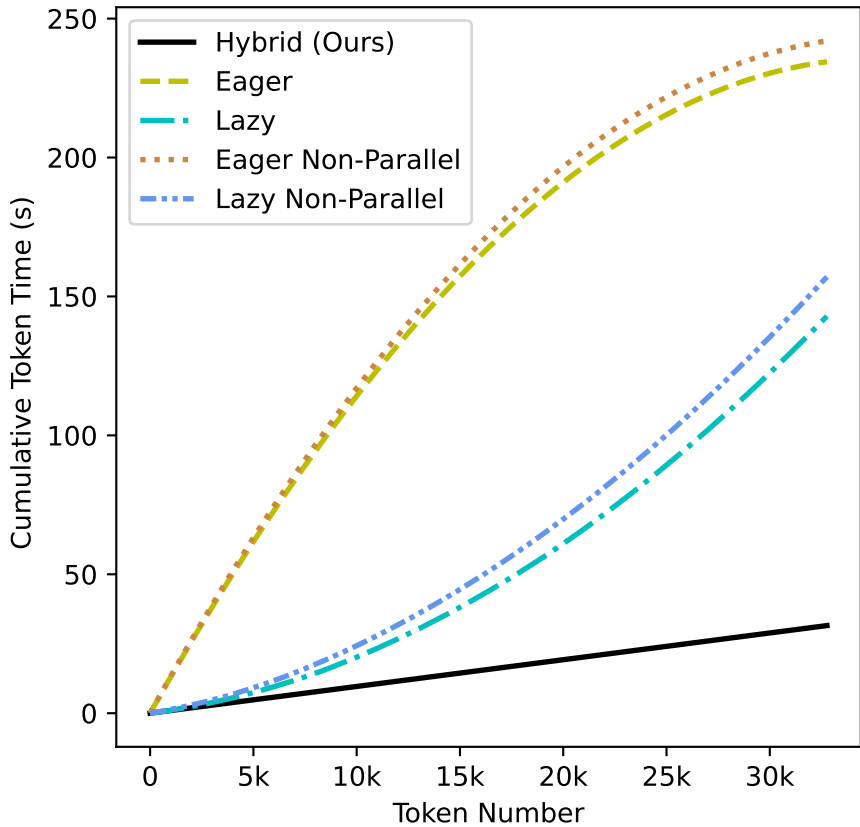

Supplement: supplementary_material [file attachment]

Hyena, batch size 4, D=256, 36 layers, L=2<sup>15</sup>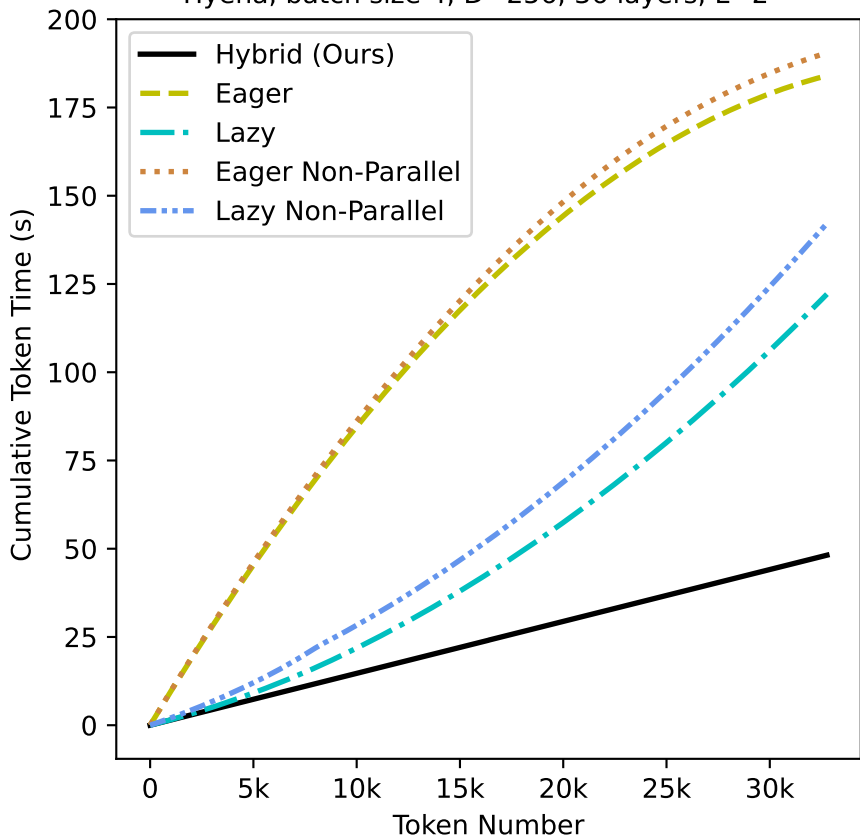

Supplement: supplementary_material [file attachment]

Hyena, batch size 2, D=768, 18 layers, L=2<sup>16</sup>

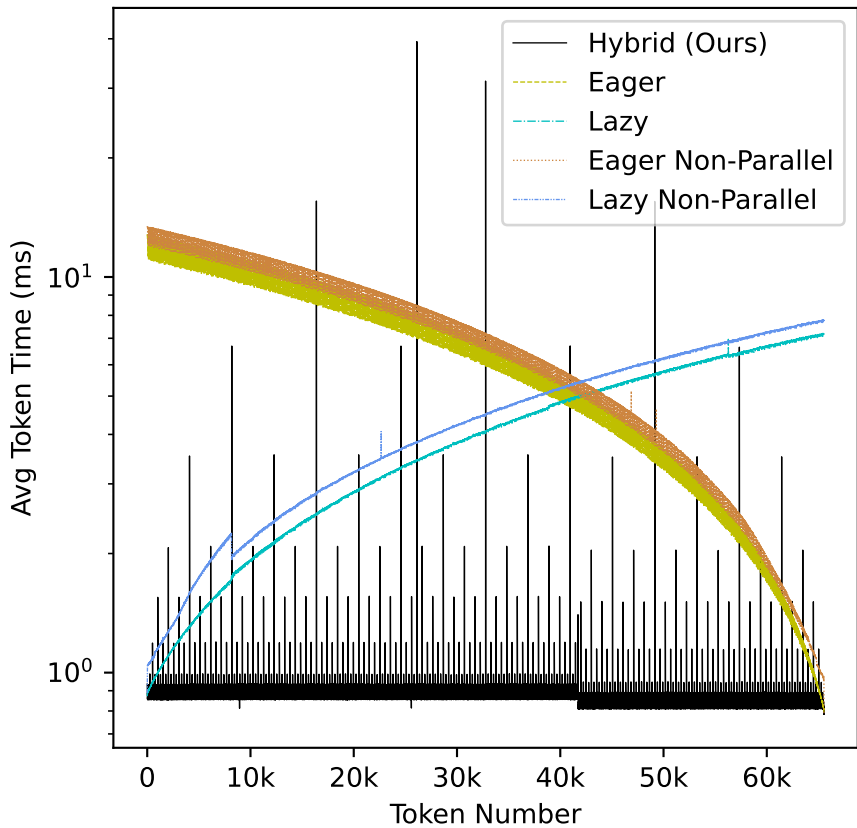

Supplement: supplementary_material [file attachment]

Synthetic, batch size 1, D=864, 36 layers, L=2<sup>16</sup>

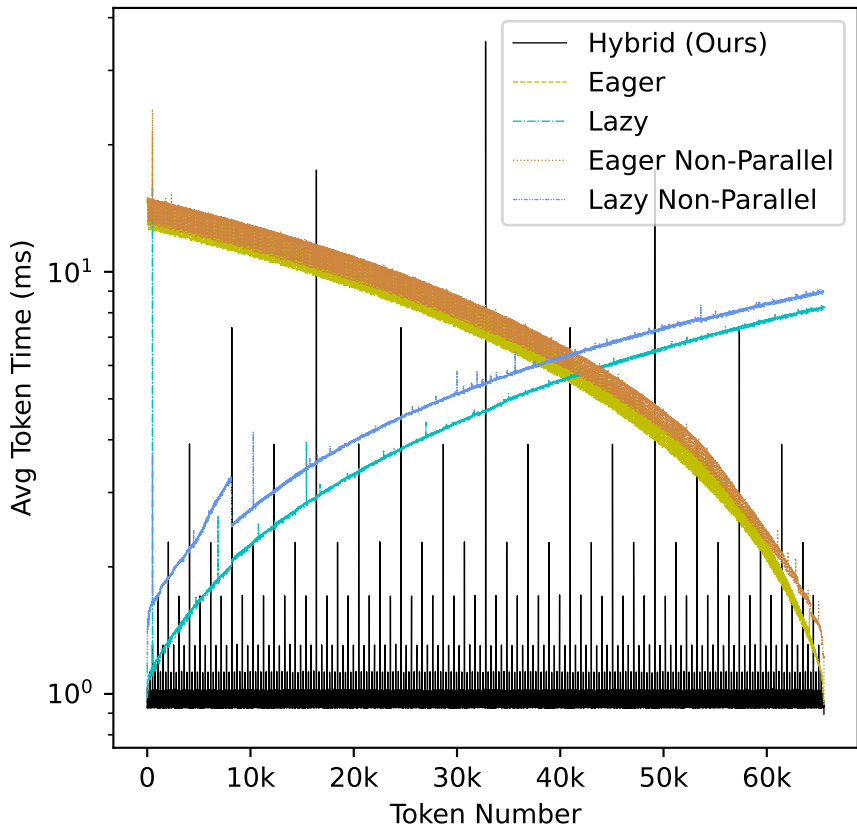

Supplement: supplementary_material [file attachment]

Hyena, batch size 4, D=864, 36 layers, L=2<sup>14</sup>

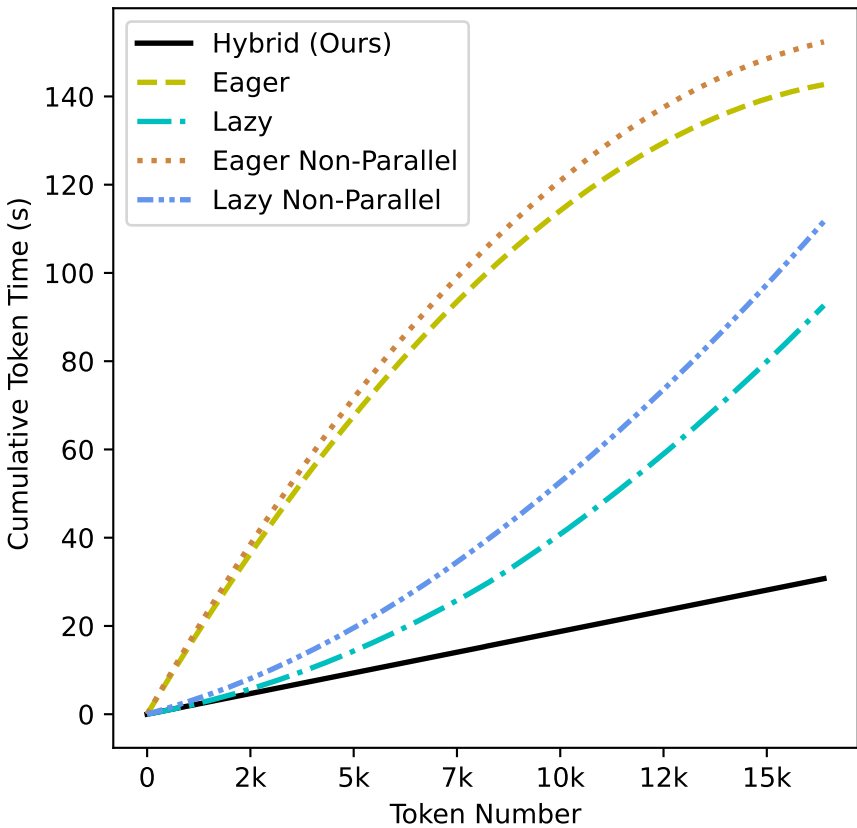

Supplement: supplementary_material [file attachment]

Convolution-part for batch size 2, D=256, 36 layers, L=2<sup>16</sup>

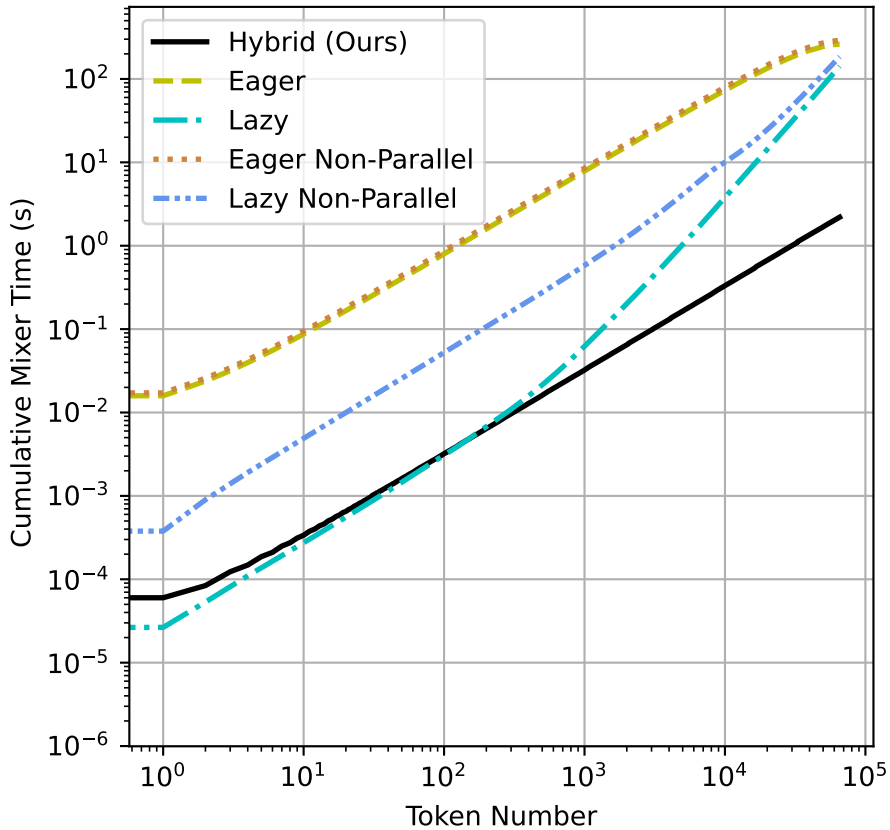

Supplement: supplementary_material [file attachment]

Hyena, batch size 2, D=256, 36 layers, L=2<sup>16</sup>

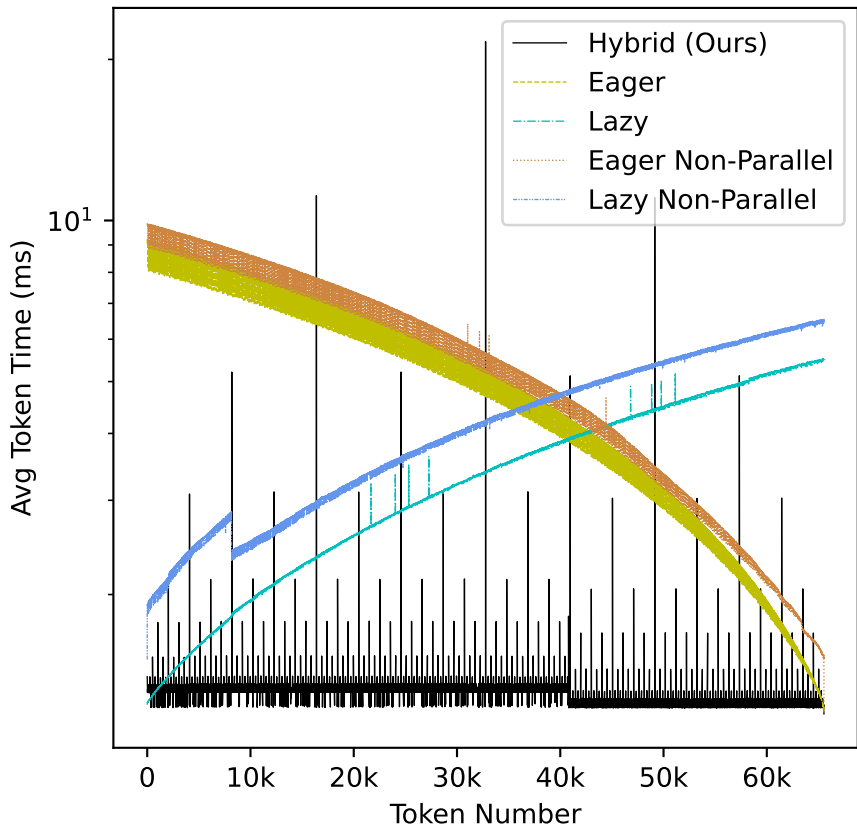

Supplement: supplementary_material [file attachment]

Hyena, batch size 2, D=256, 18 layers, L=2<sup>17</sup>

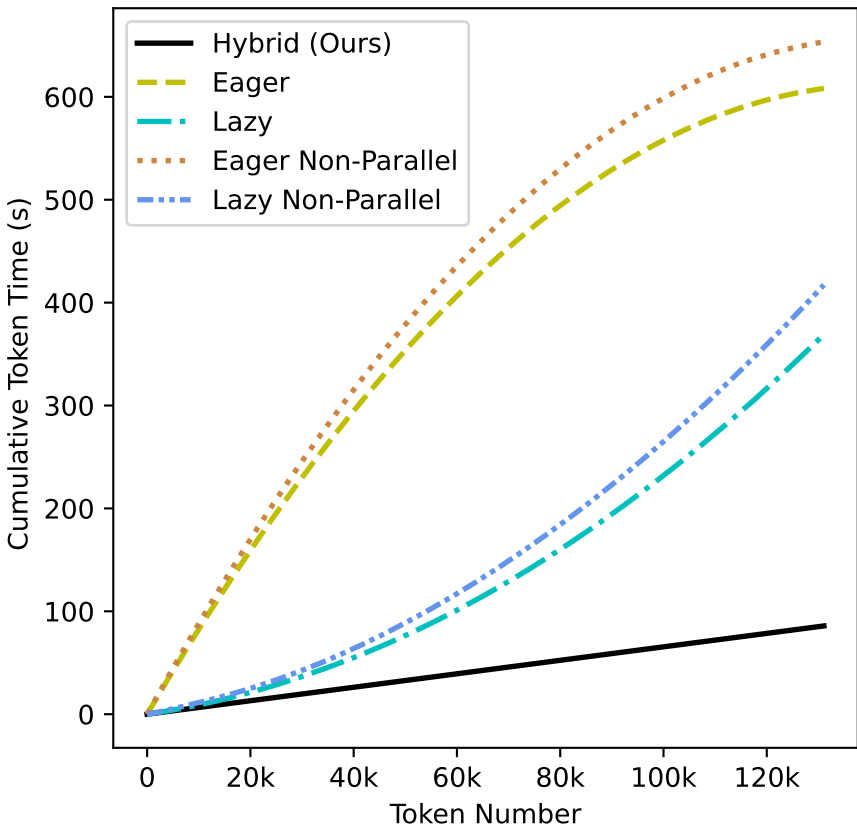

Supplement: supplementary_material [file attachment]

Convolution-part for batch size 1, D=864, 18 layers, L=2<sup>17</sup>

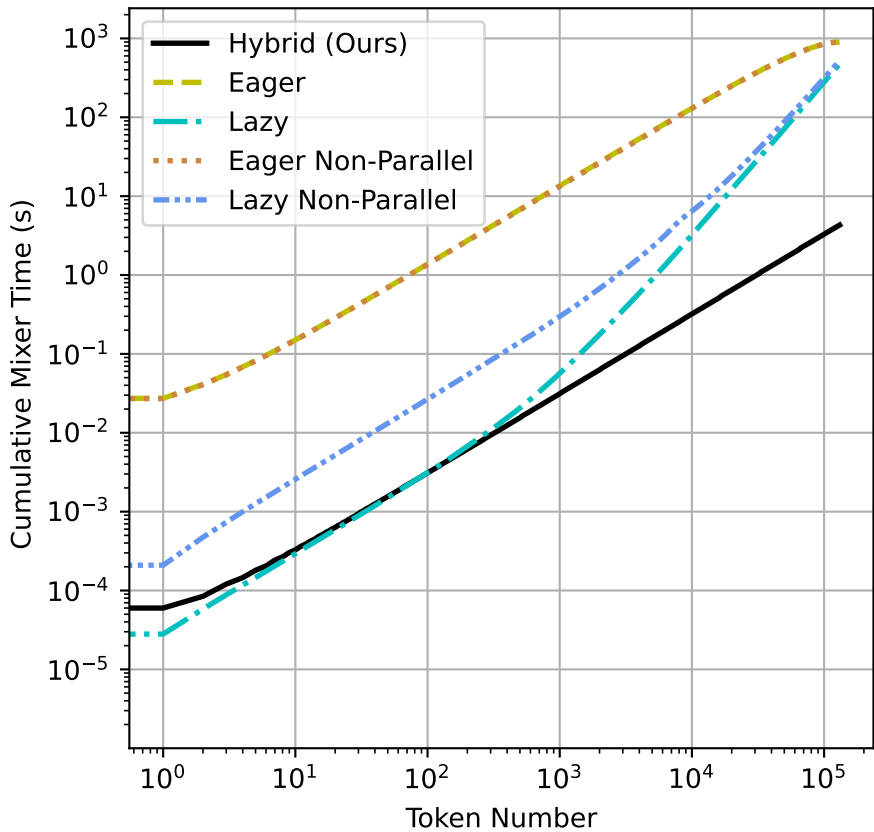

Supplement: supplementary_material [file attachment]

Synthetic, batch size 1, D=864, 36 layers, L=2<sup>16</sup>

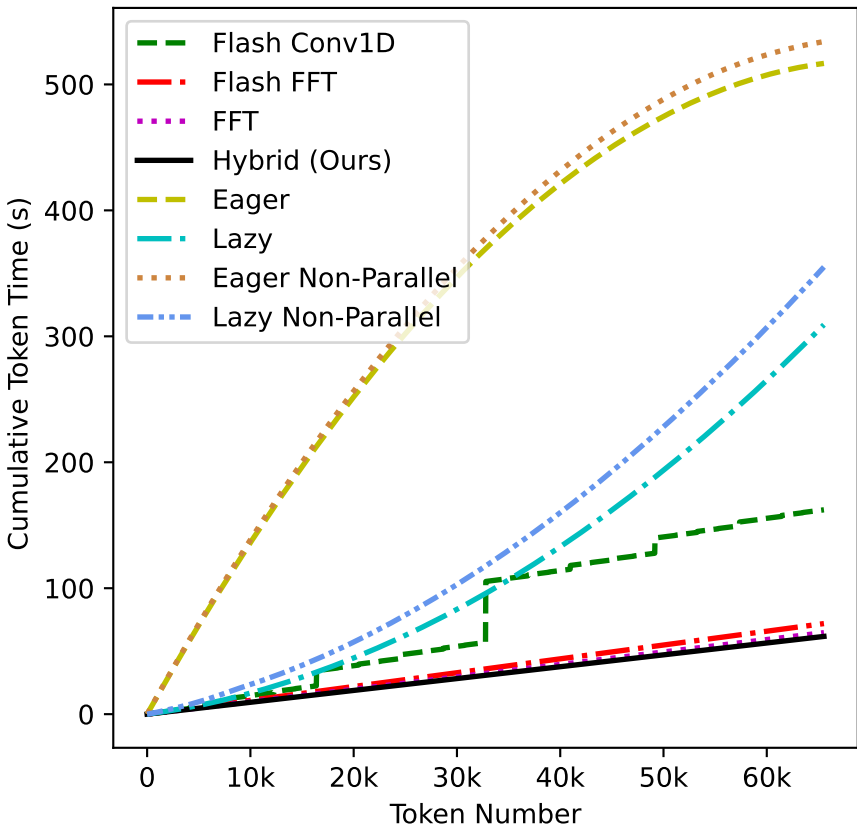

Supplement: supplementary_material [file attachment]

Synthetic, batch size 8, D=256, 18 layers, L=2<sup>15</sup>

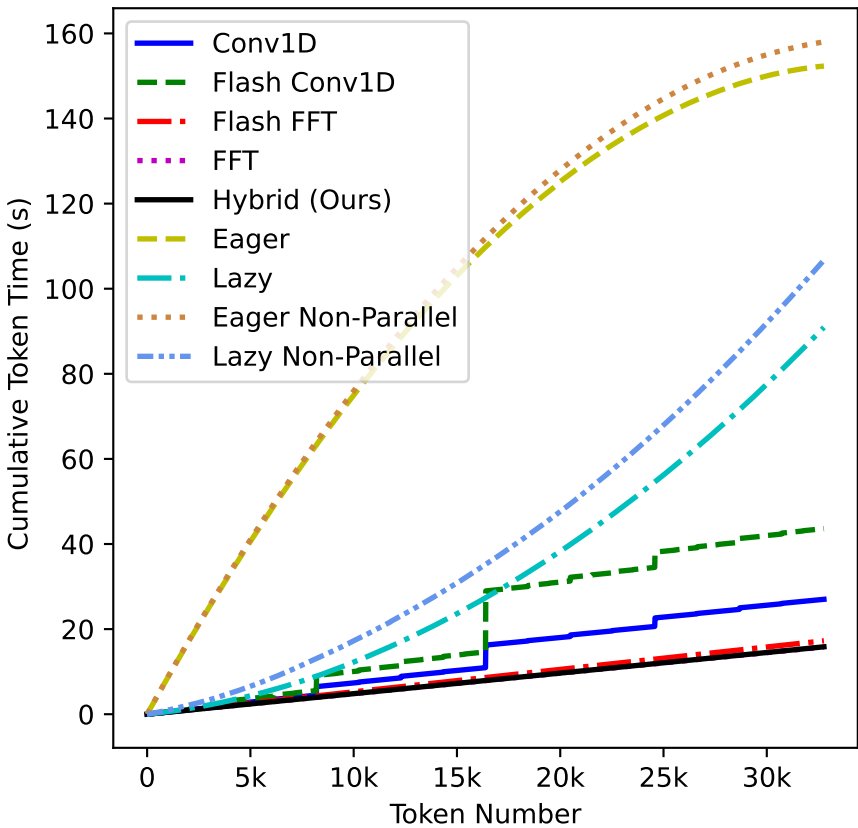

Supplement: supplementary_material [file attachment]

Synthetic, batch size 1, D=768, 36 layers, L=2<sup>16</sup>

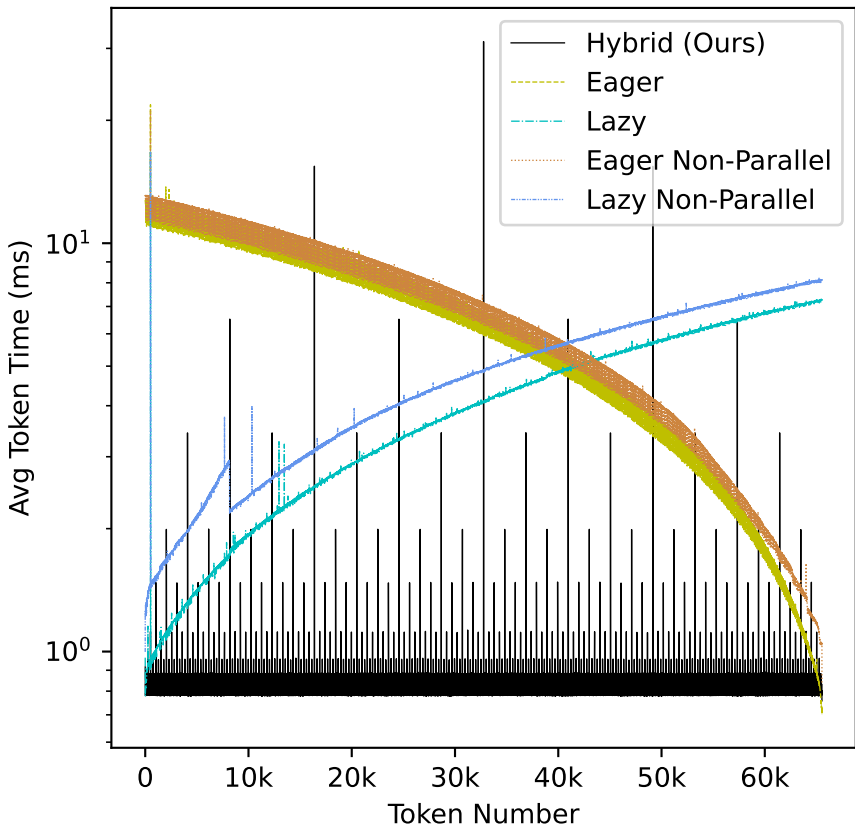

Supplement: supplementary_material [file attachment]

Convolution-part for batch size 8, D=768, 18 layers, L= $2^{14}$

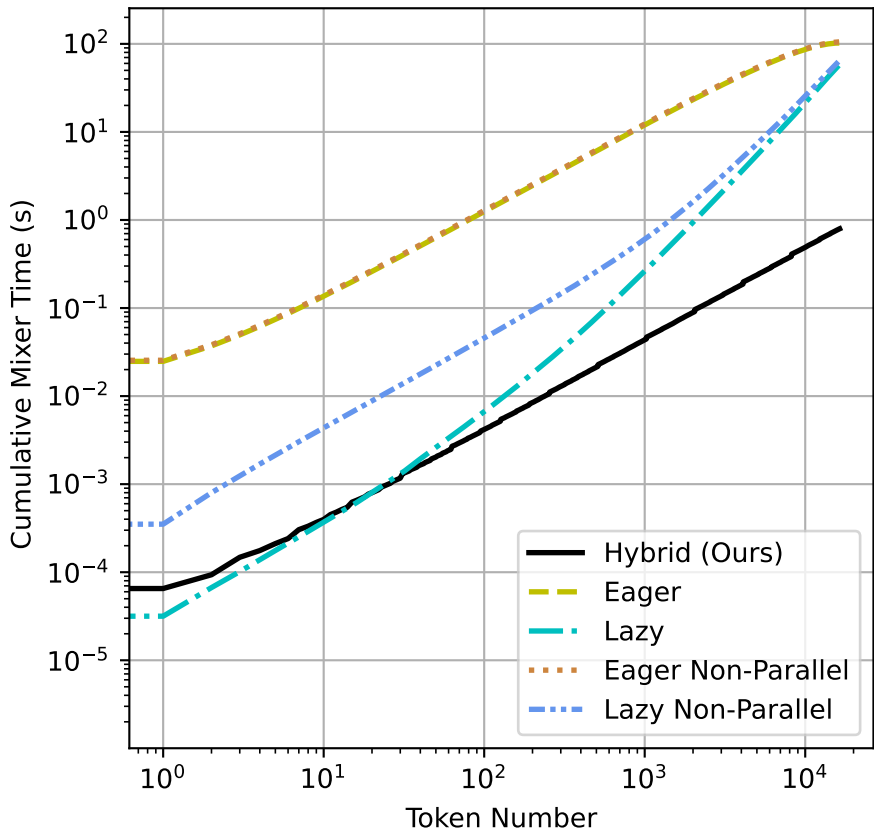

Supplement: supplementary_material [file attachment]

Synthetic, batch size 2, D=256, 36 layers, L=2<sup>16</sup>

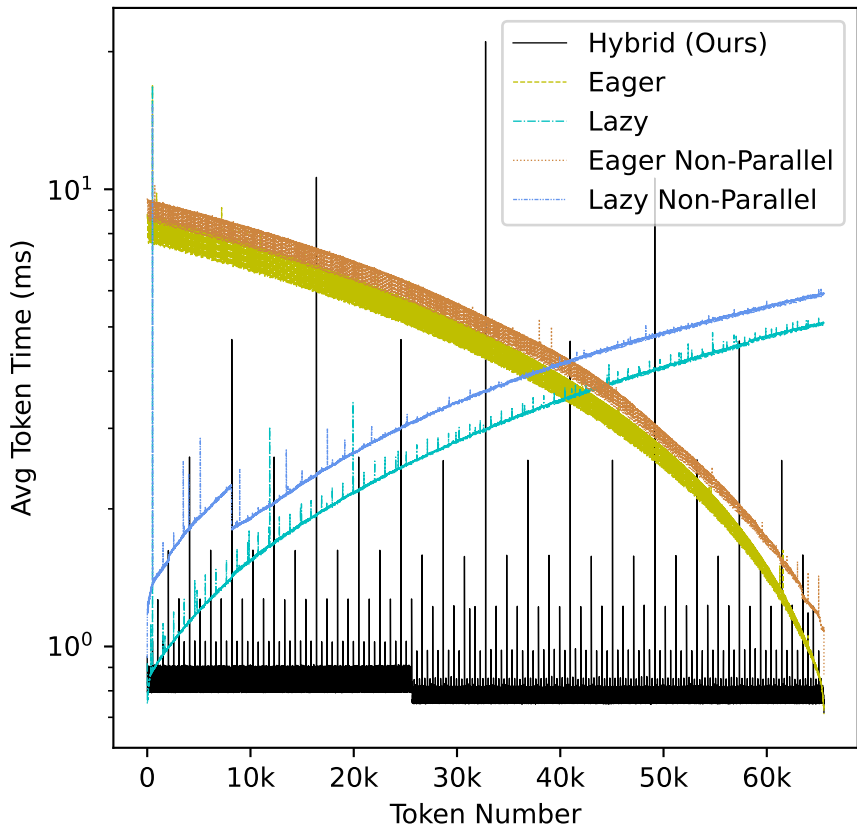

Supplement: supplementary_material [file attachment]

Hyena, batch size 2, D=768, 36 layers, L=2<sup>15</sup>

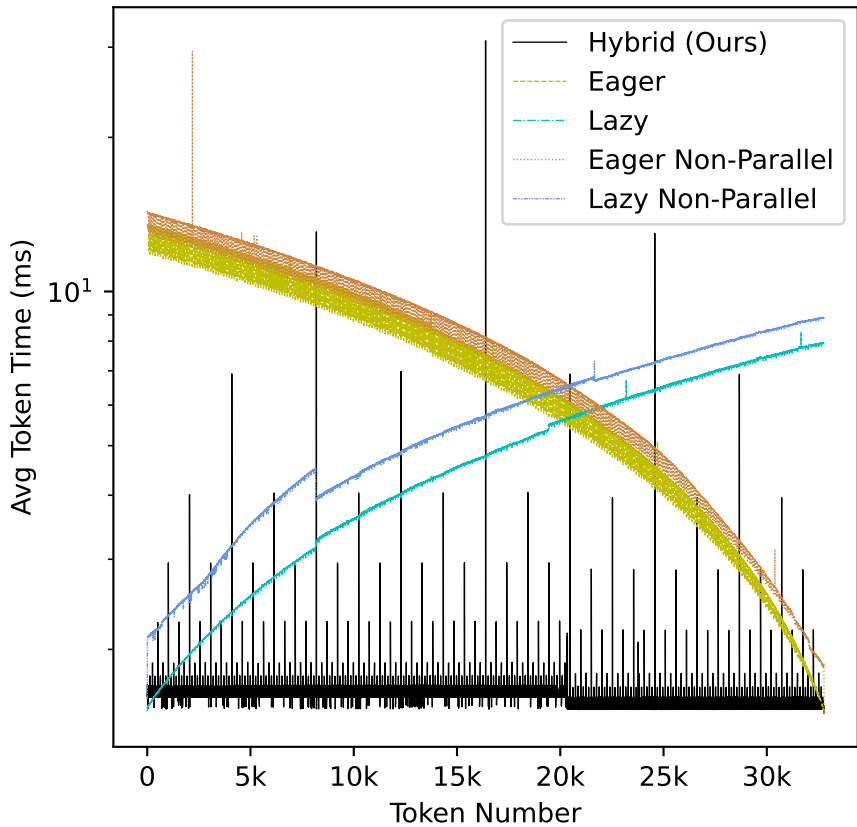

Supplement: supplementary_material [file attachment]

Convolution-part for batch size 4, D=256, 36 layers, L=2<sup>15</sup>

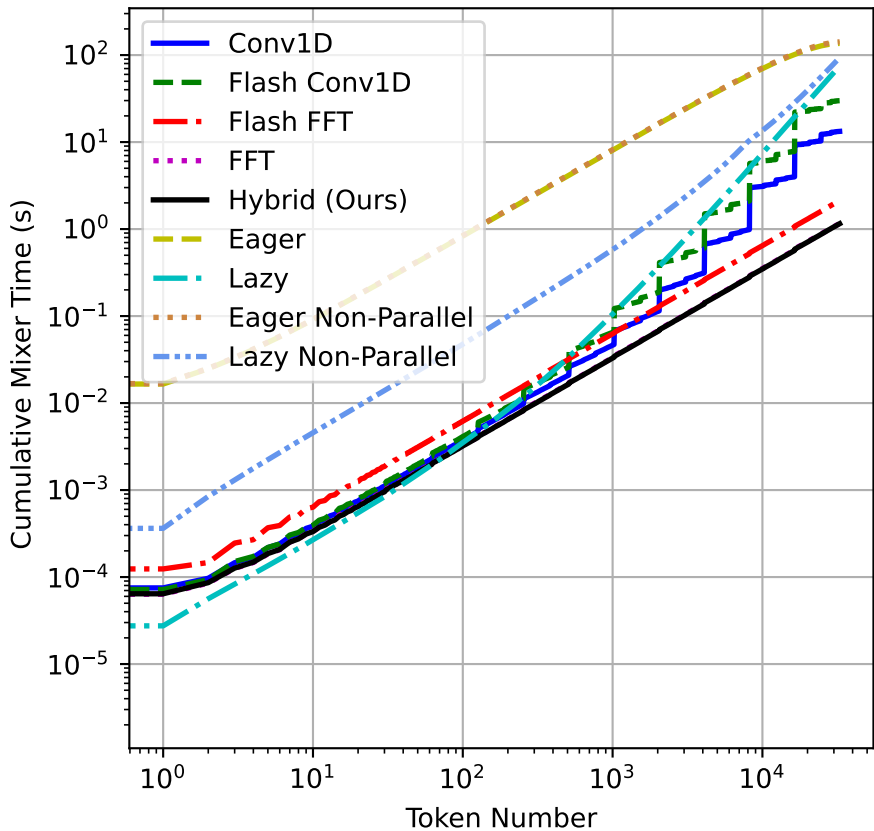

Supplement: supplementary_material [file attachment]

Hyena, batch size 4, D=864, 18 layers, L=2<sup>15</sup>

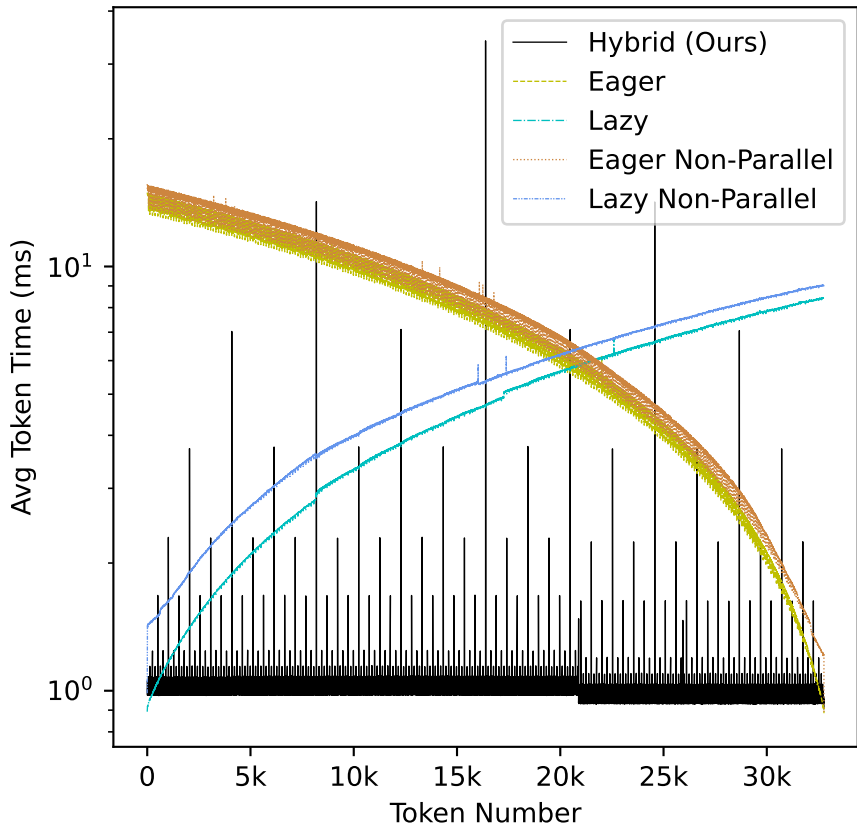

Supplement: supplementary_material [file attachment]

Synthetic, batch size 4, D=768, 36 layers, L=2<sup>14</sup>

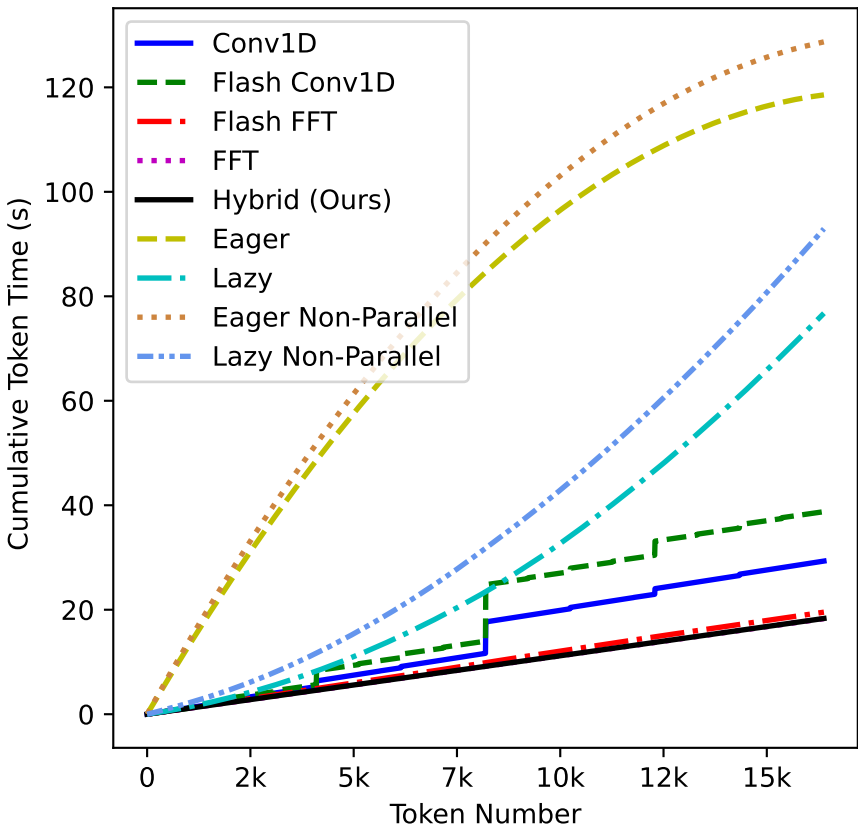

Supplement: supplementary_material [file attachment]

Synthetic, batch size 4, D=864, 36 layers, L=2<sup>14</sup>

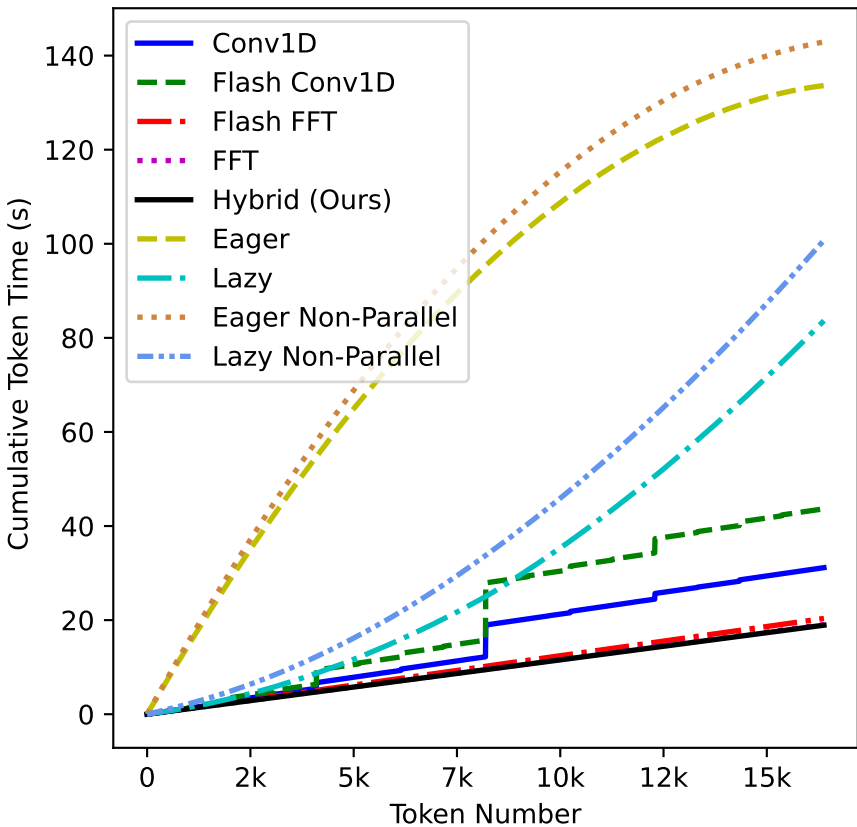

Supplement: supplementary_material [file attachment]

Hyena, batch size 8, D=864, 18 layers, L=2<sup>14</sup>

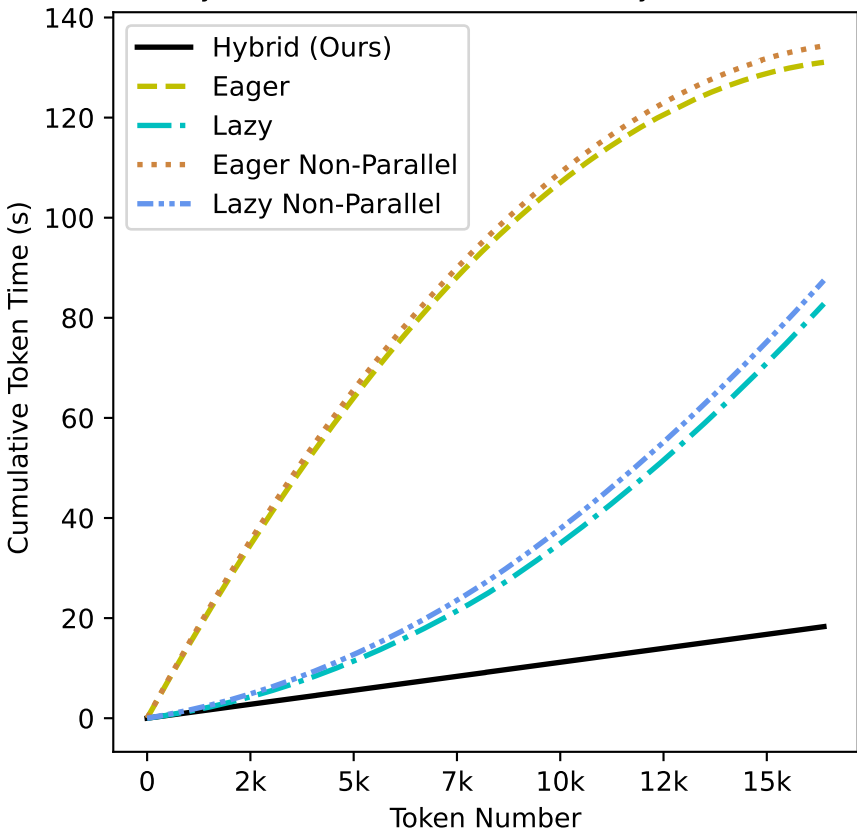

Supplement: supplementary_material [file attachment]

Hyena, batch size 1, D=864, 36 layers, L=2<sup>16</sup>

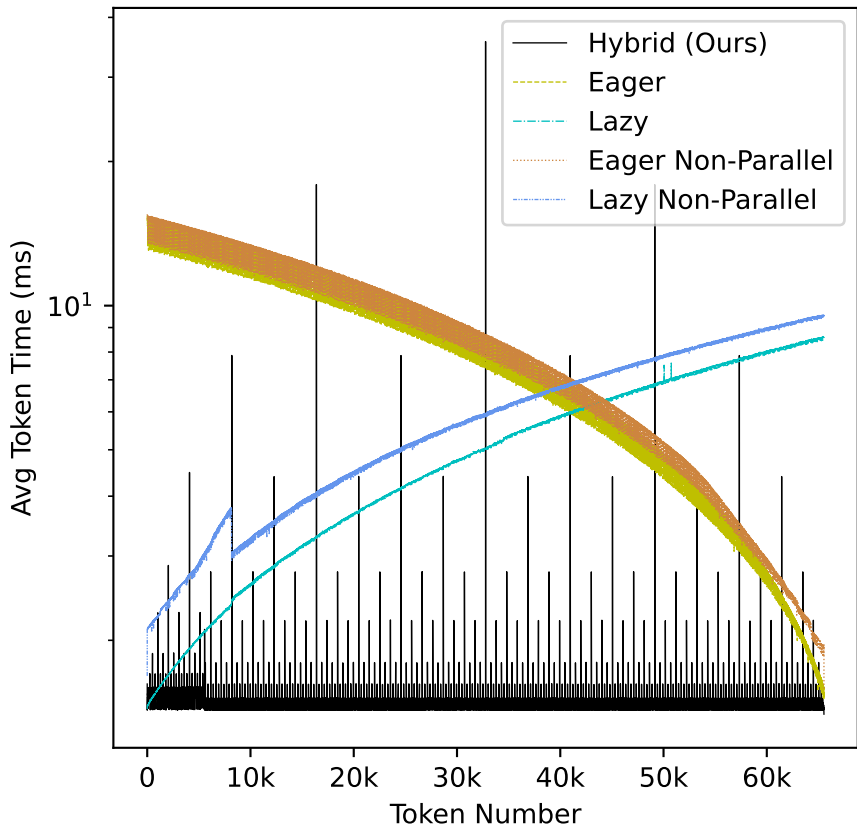

Supplement: supplementary_material [file attachment]

Hyena, batch size 1, D=768, 36 layers, L=2<sup>16</sup>

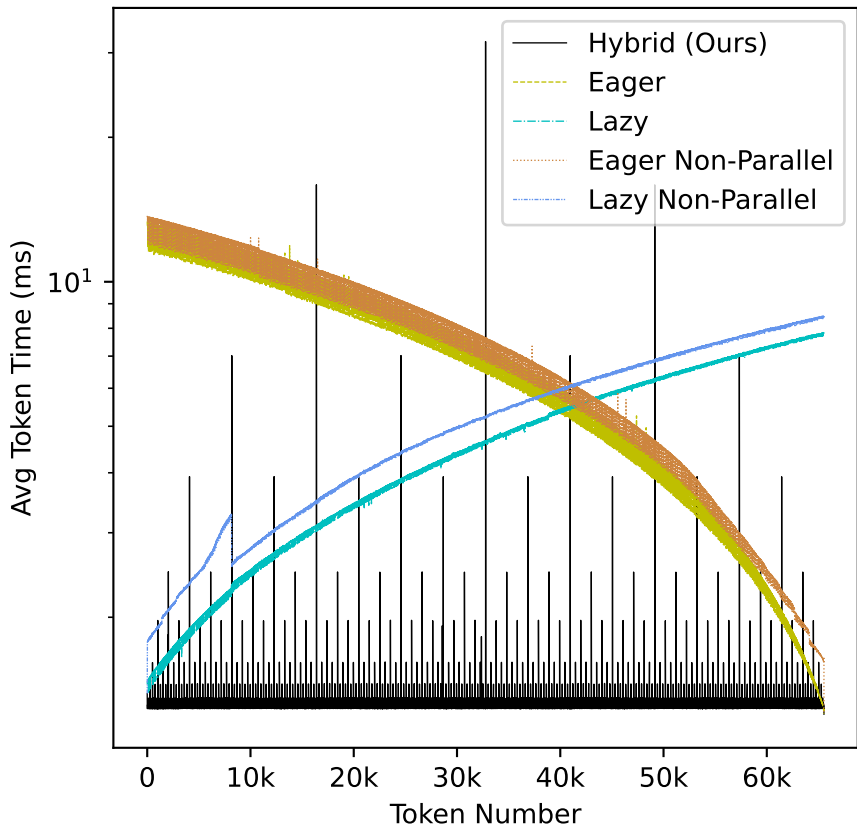

Supplement: supplementary_material [file attachment]

Synthetic, batch size 4, D=256, 18 layers, L=2<sup>16</sup>

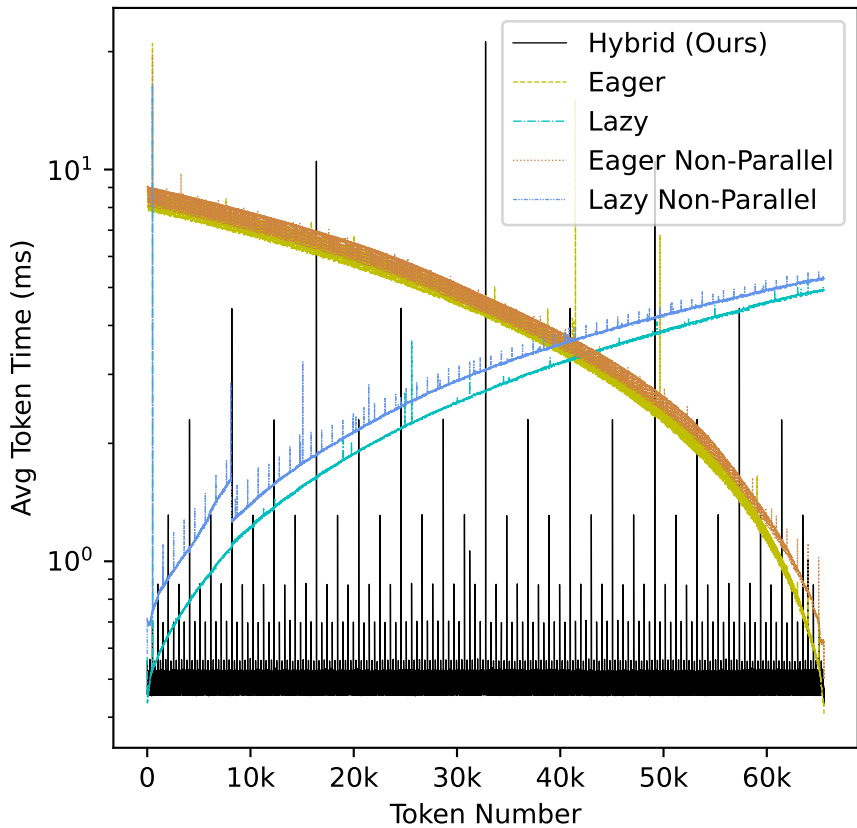

Supplement: supplementary_material [file attachment]

Hyena, batch size 8, D=864, 18 layers, L=2<sup>14</sup>

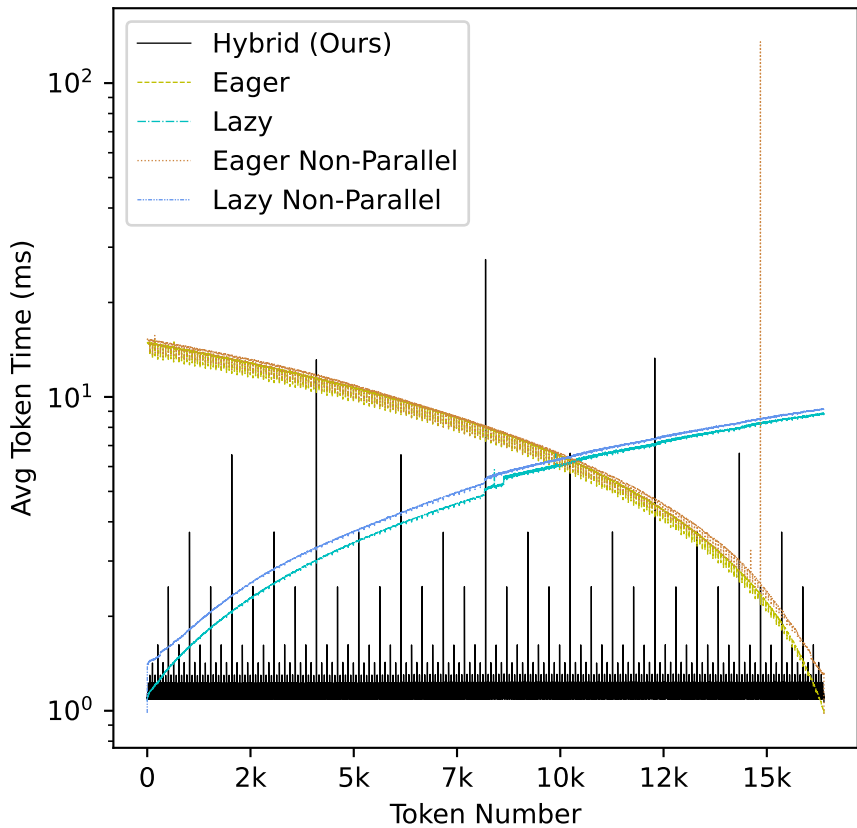

Supplement: supplementary_material [file attachment]

Convolution-part for batch size 1, D=256, 18 layers, L=2<sup>18</sup>

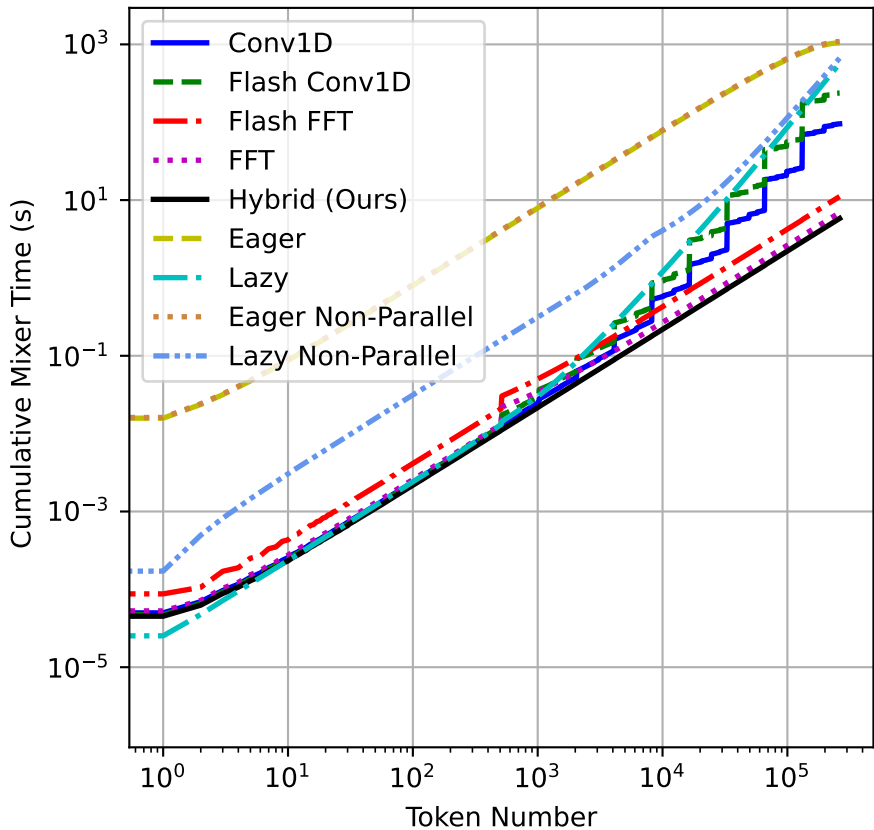

Supplement: supplementary_material [file attachment]

Synthetic, batch size 2, D=768, 18 layers, L=2<sup>16</sup>

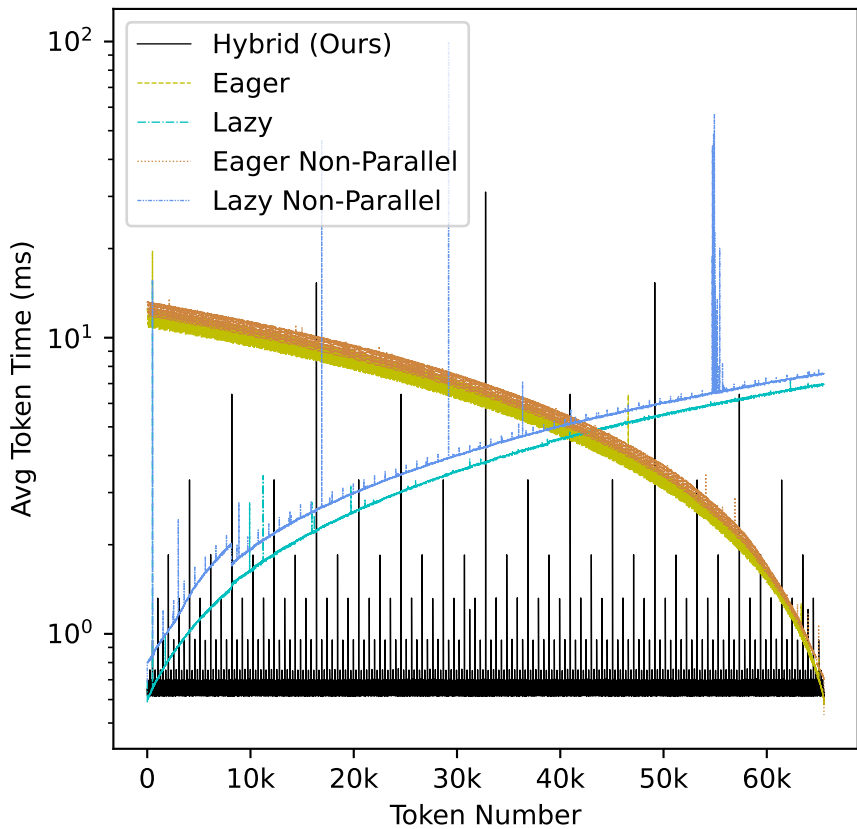

Supplement: supplementary_material [file attachment]

Synthetic, batch size 2, D=864, 36 layers, L=2<sup>15</sup>

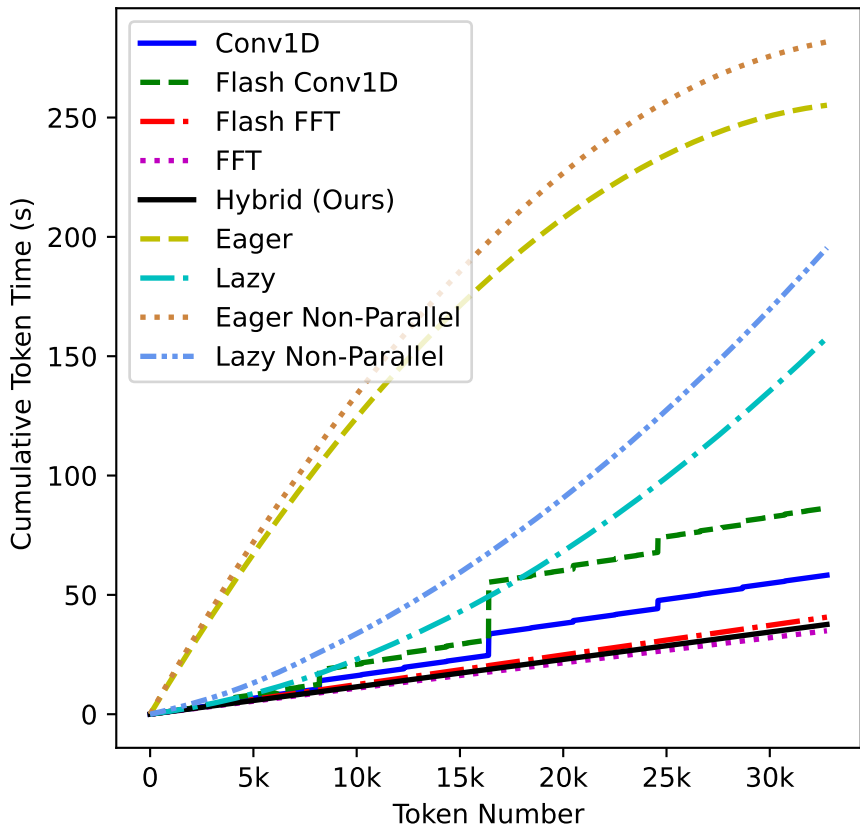

Supplement: supplementary_material [file attachment]

Synthetic, batch size 4, D=768, 18 layers, L=2<sup>15</sup>

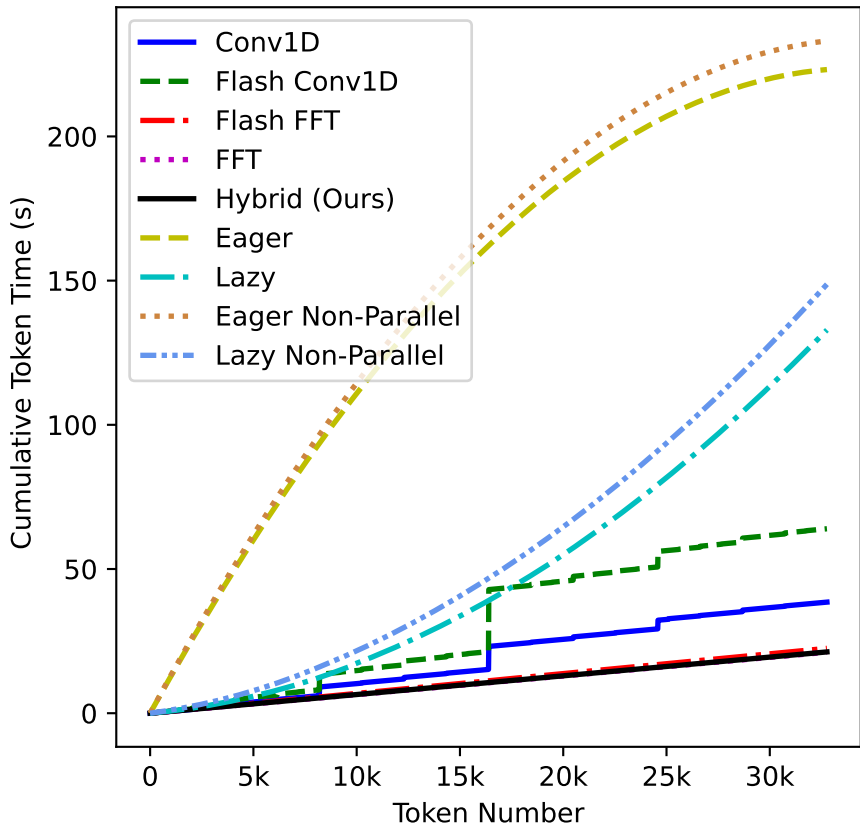

Supplement: supplementary_material [file attachment]

Hyena, batch size 2, D=864, 18 layers, L=2<sup>16</sup>

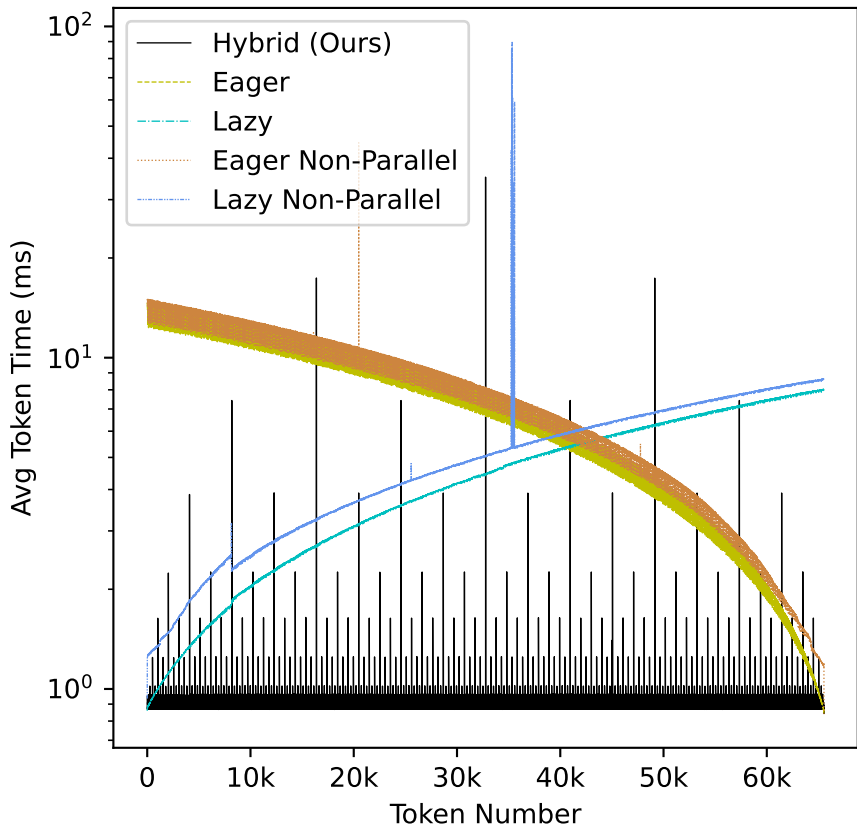

Supplement: supplementary_material [file attachment]

Convolution-part for batch size 4, D=256, 36 layers, L=2<sup>15</sup>

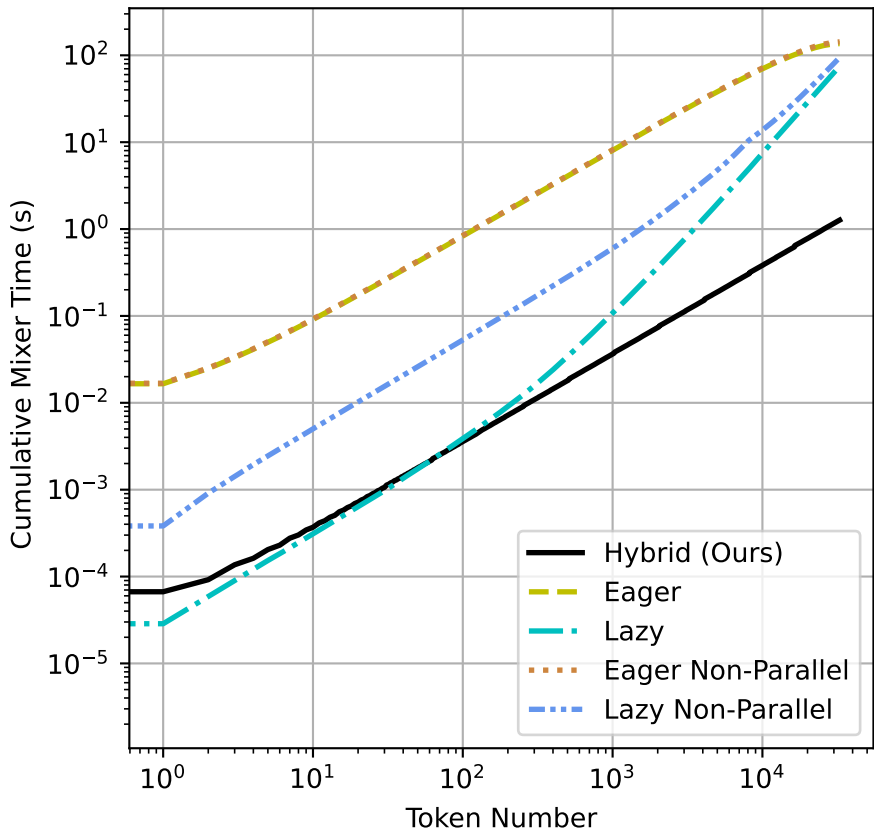

Supplement: supplementary_material [file attachment]

Synthetic, batch size 1, D=256, 36 layers, L=2<sup>17</sup>

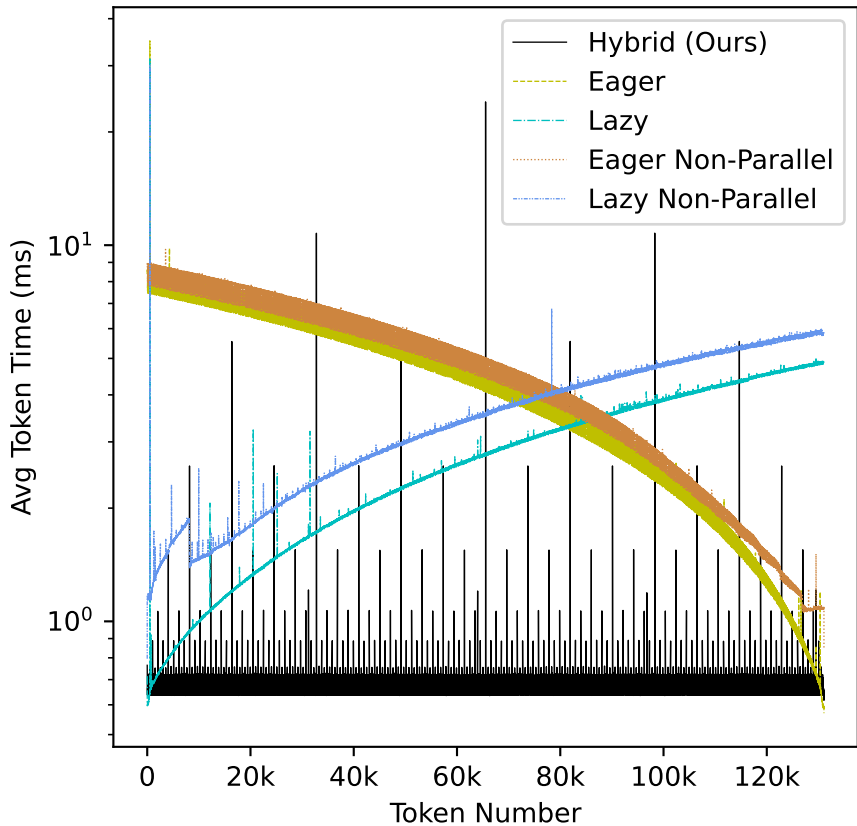

Supplement: supplementary_material [file attachment]

Convolution-part for batch size 1, D=256, 36 layers, L=2<sup>17</sup>

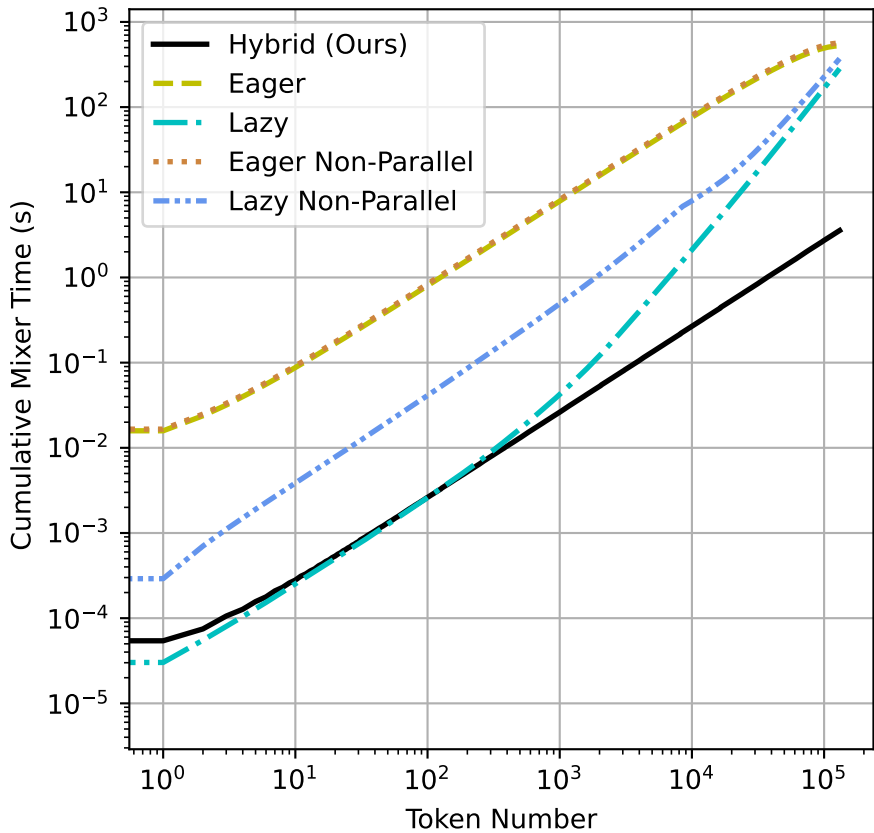

Supplement: supplementary_material [file attachment]

Convolution-part for batch size 1, D=864, 36 layers, L=2<sup>16</sup>

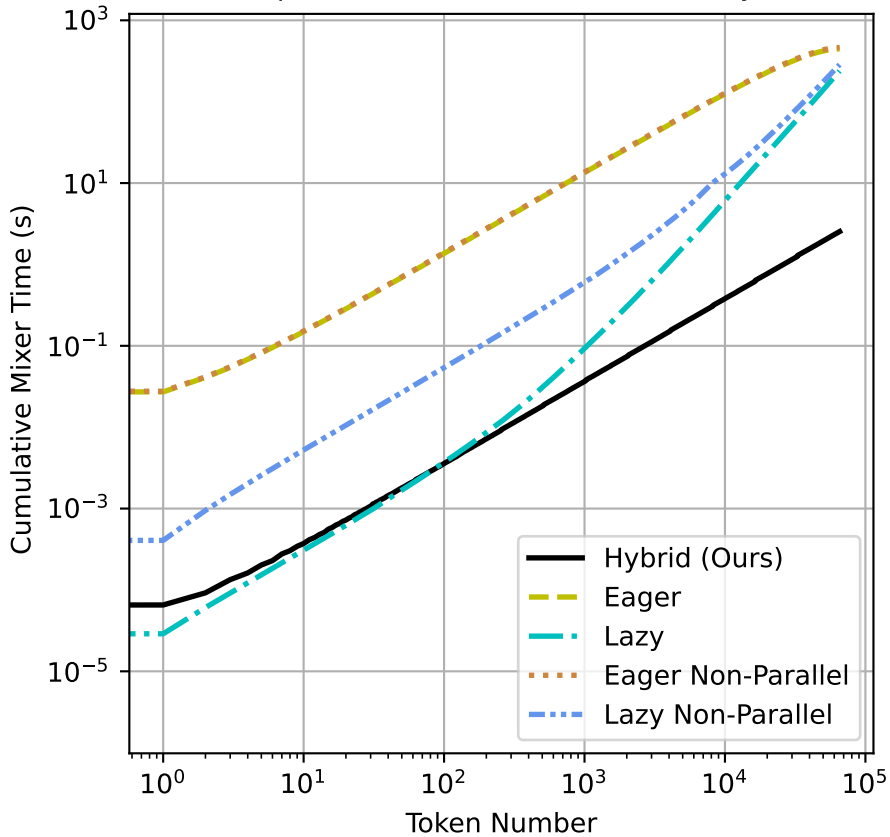

Supplement: supplementary_material [file attachment]

Convolution-part for batch size 4, D=768, 36 layers, L=2<sup>14</sup>

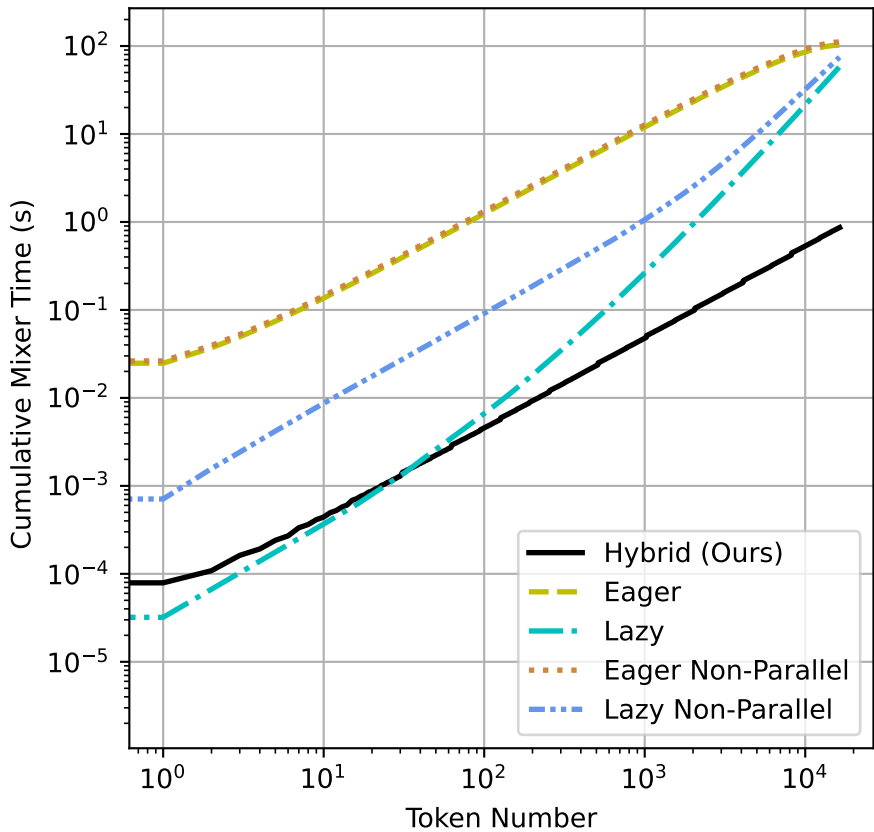

Supplement: supplementary_material [file attachment]

Convolution-part for batch size 2, D=864, 36 layers, L=2<sup>15</sup>

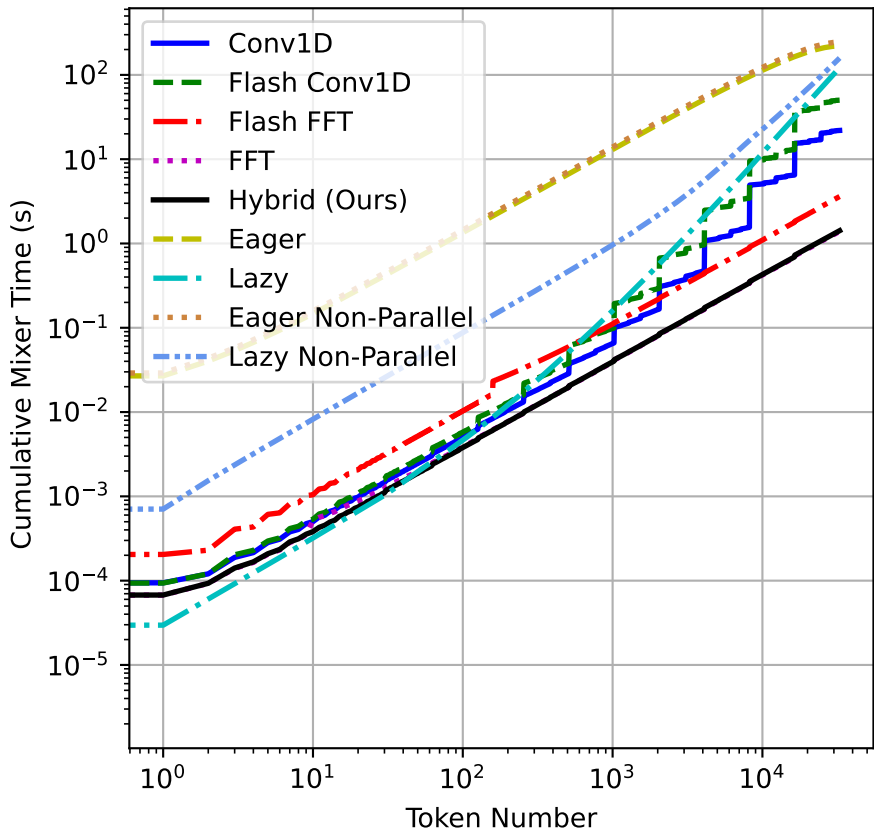

Supplement: supplementary_material [file attachment]

Convolution-part for batch size 8, D=256, 18 layers, L=2<sup>15</sup>

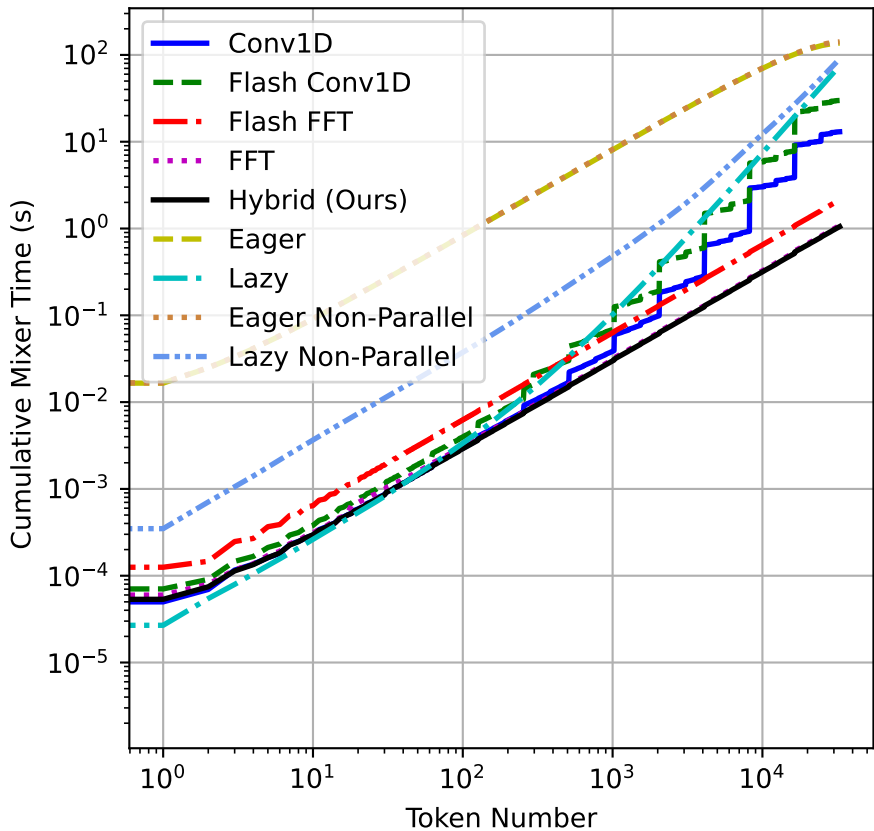

Supplement: supplementary_material [file attachment]

Convolution-part for batch size 4, D=864, 36 layers, L=2<sup>14</sup>

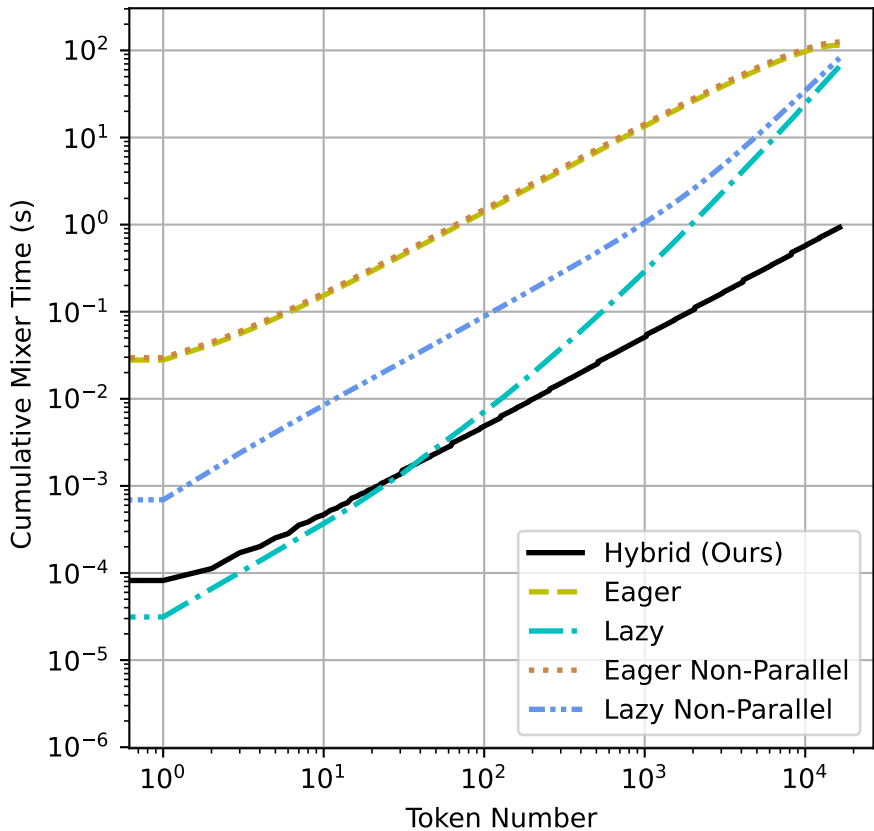

Supplement: supplementary_material [file attachment]

Synthetic, batch size 4, D=864, 18 layers, L=2<sup>15</sup>

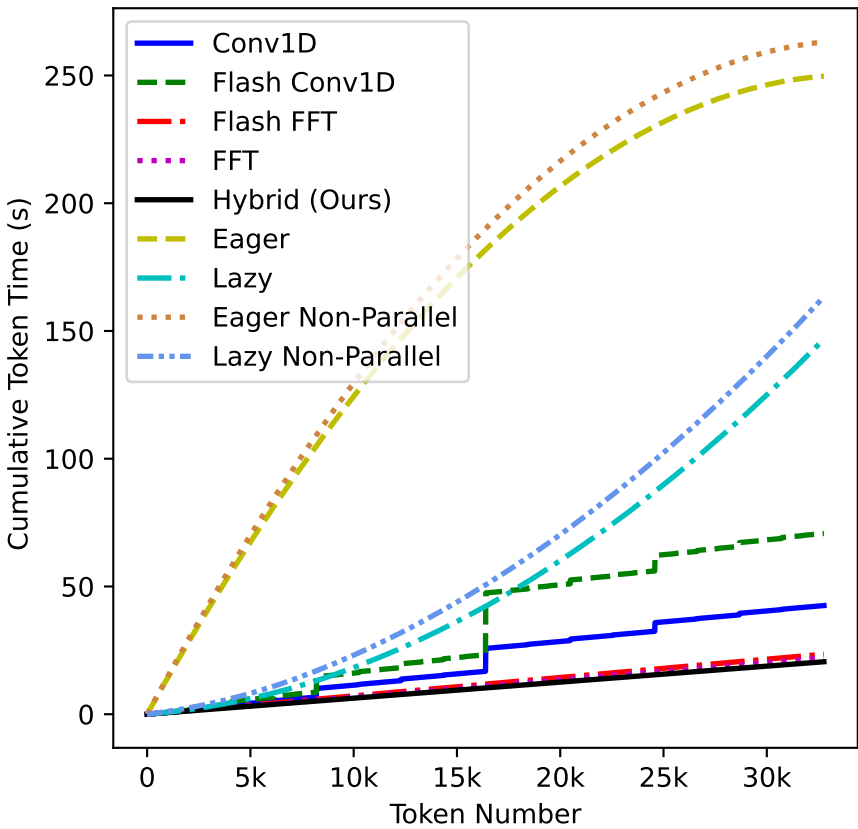

Supplement: supplementary_material [file attachment]

Synthetic, batch size 4, D=864, 18 layers,  $L=2^{15}$

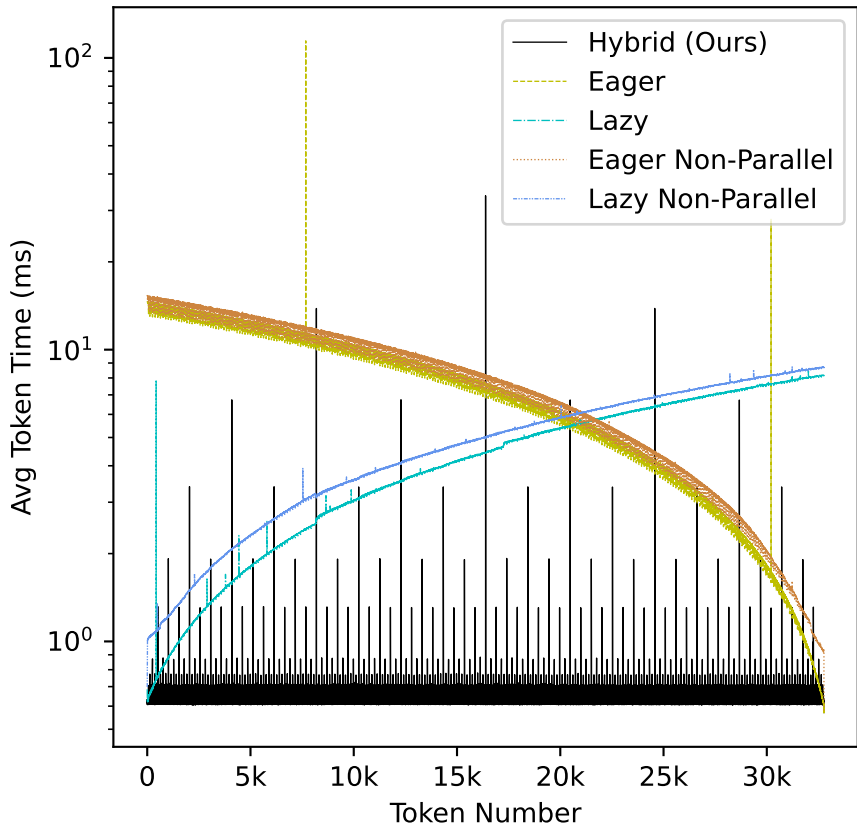

Supplement: supplementary_material [file attachment]

Synthetic, batch size 1, D=256, 36 layers, L=2<sup>17</sup>

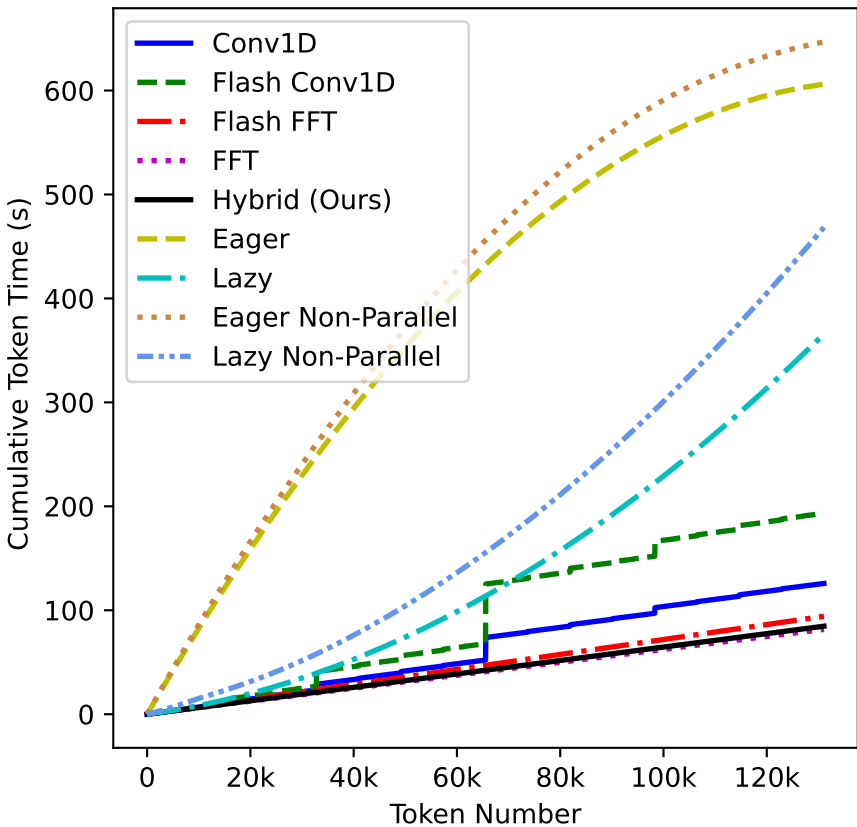

Supplement: supplementary_material [file attachment]

Convolution-part for batch size 1, D=864, 36 layers, L=2<sup>16</sup>

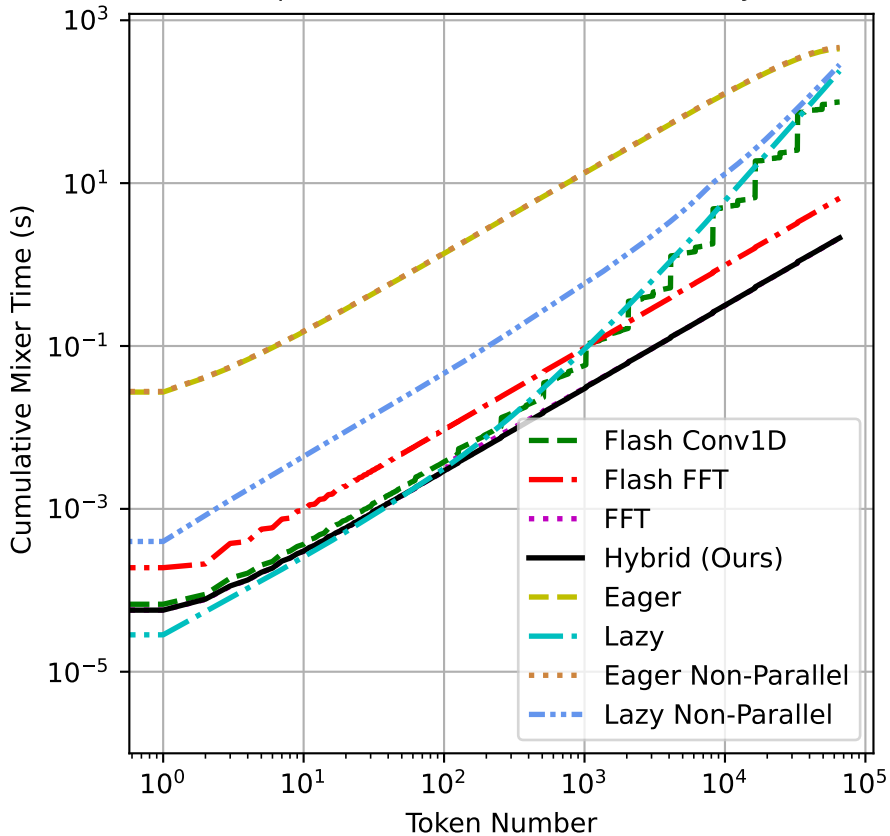

Supplement: supplementary_material [file attachment]

Synthetic, batch size 4, D=256, 36 layers, L=2<sup>15</sup>

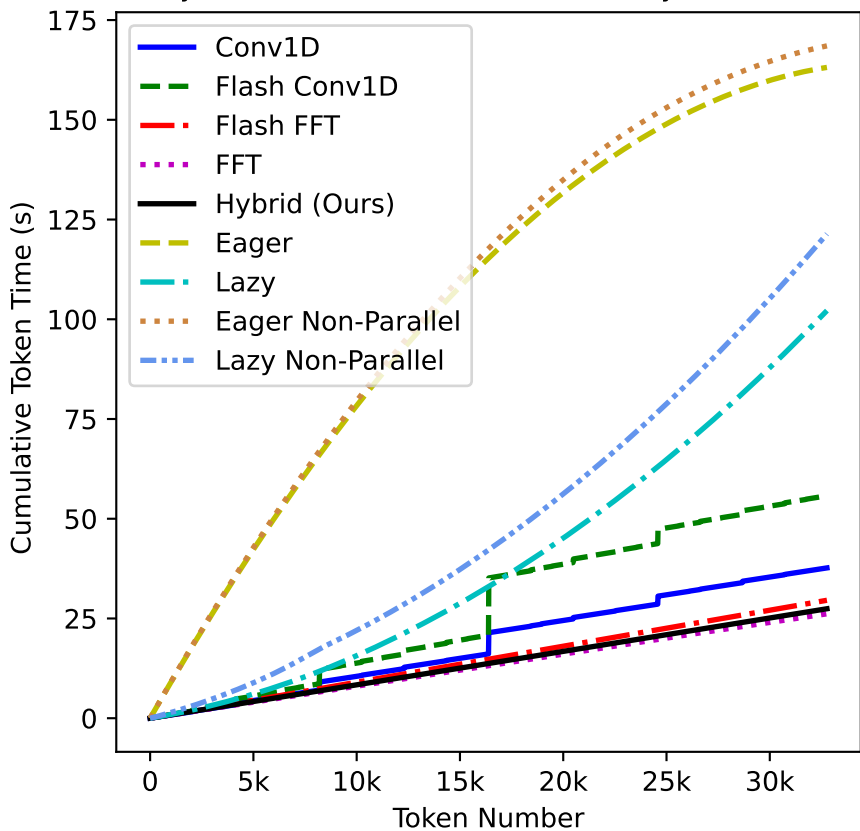

Supplement: supplementary_material [file attachment]

Synthetic, batch size 4, D=768, 18 layers, L=2<sup>15</sup>

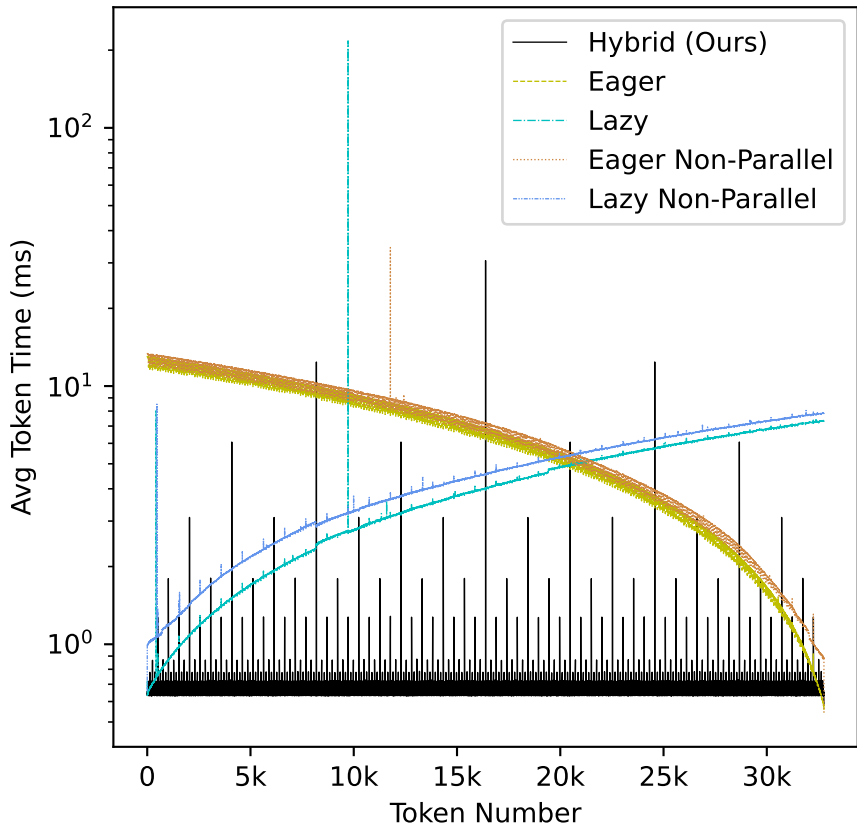

Supplement: supplementary_material [file attachment]

Convolution-part for batch size 4, D=864, 36 layers, L=2<sup>14</sup>

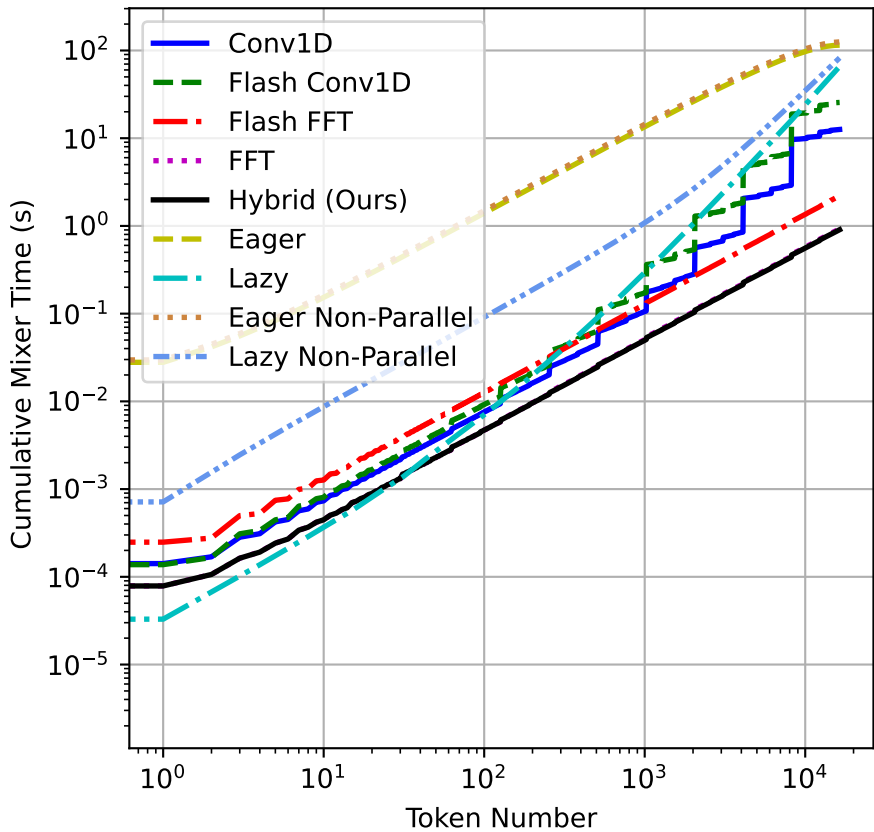

Supplement: supplementary_material [file attachment]

Hyena, batch size 1, D=864, 36 layers, L=2<sup>16</sup>

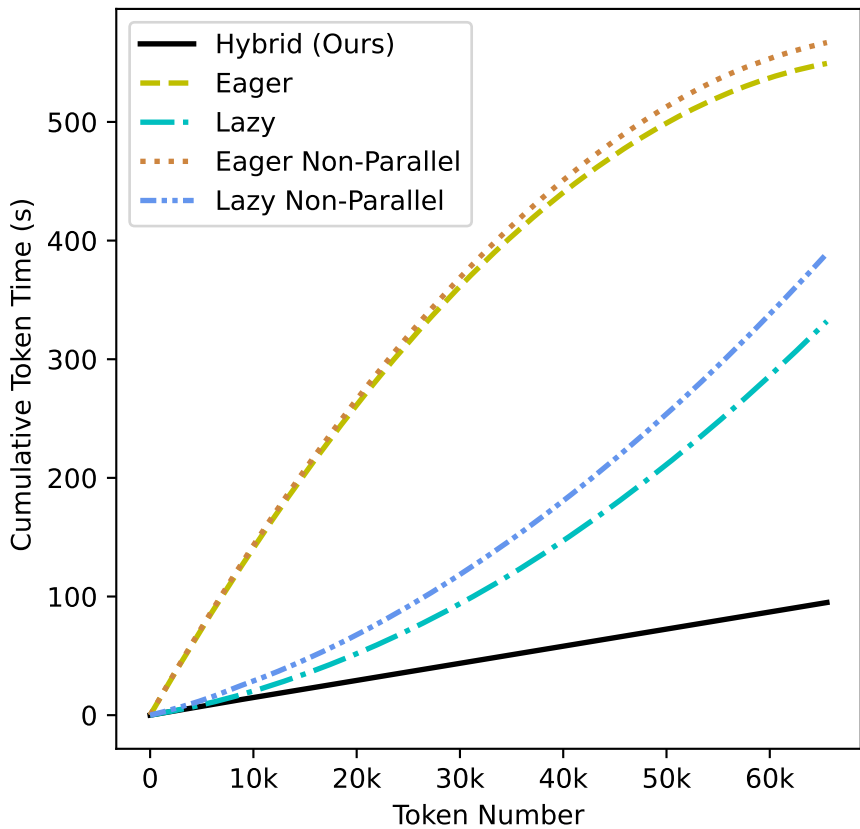

Supplement: supplementary_material [file attachment]

Convolution-part for batch size 8, D=256, 18 layers, L= $2^{15}$

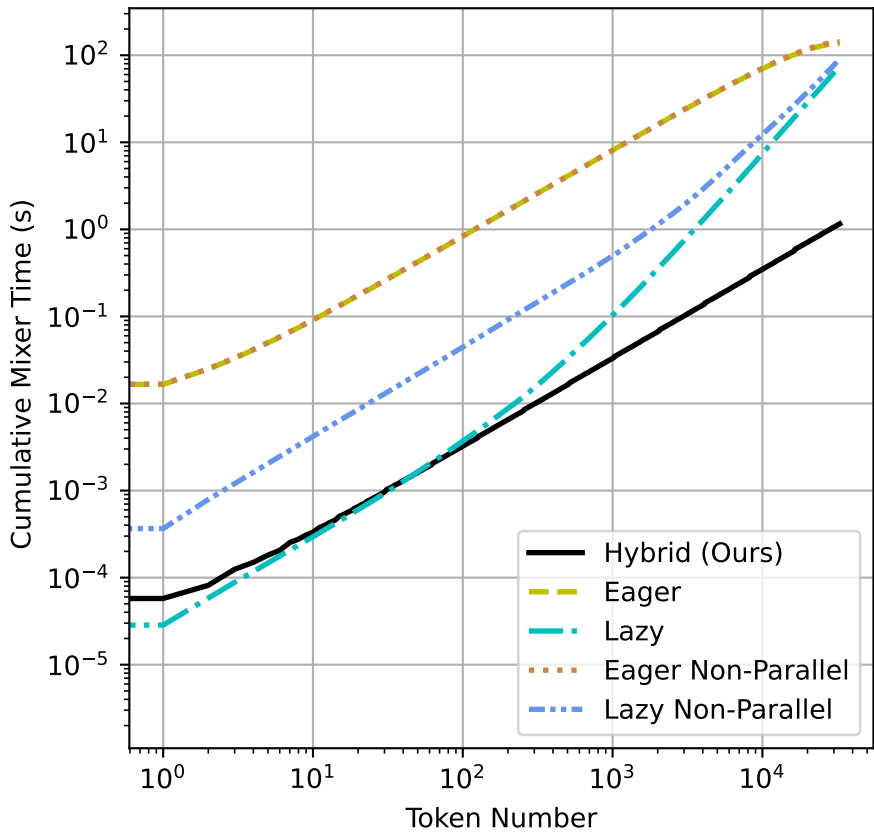

Supplement: supplementary_material [file attachment]

Convolution-part for batch size 4, D=256, 18 layers, L=2<sup>16</sup>

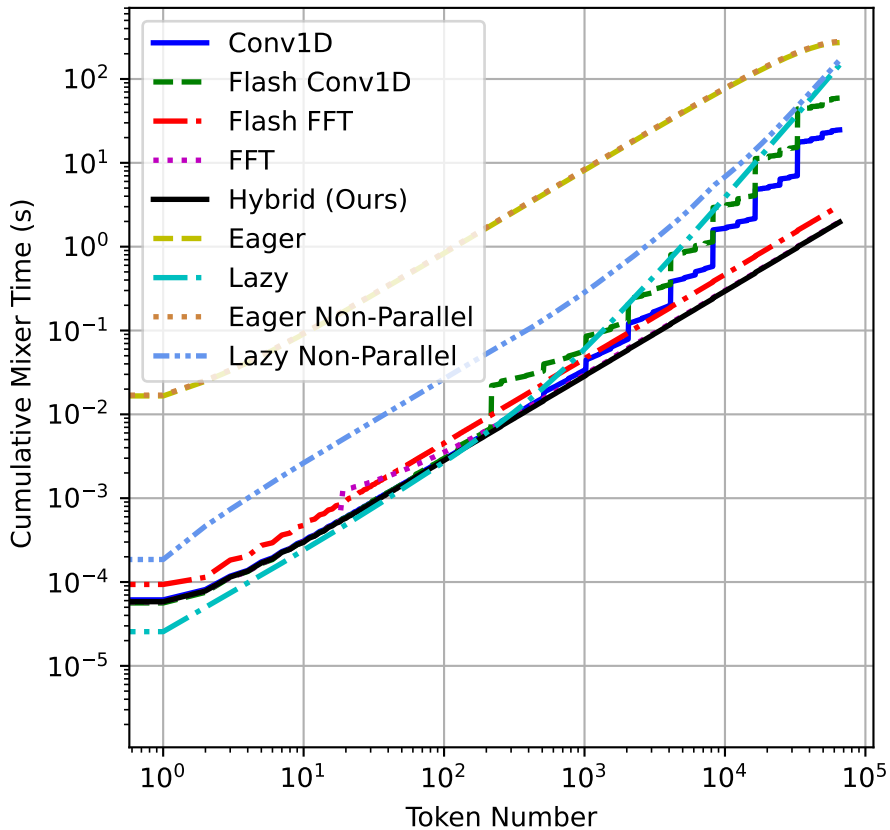

Supplement: supplementary_material [file attachment]

Hyena, batch size 2, D=768, 36 layers, L=2<sup>15</sup>

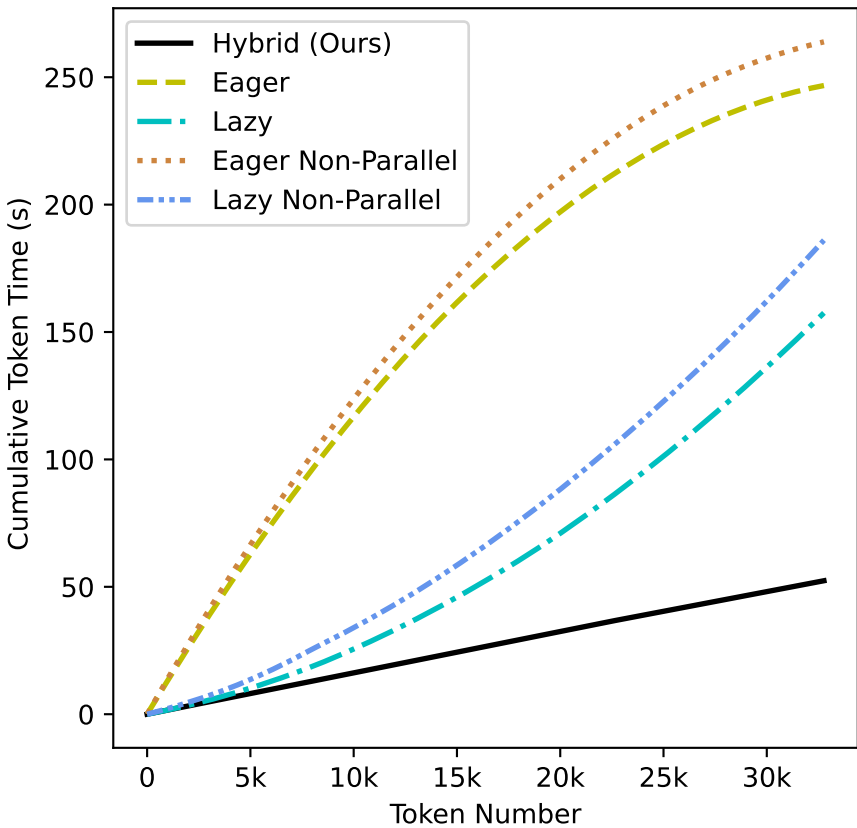

Supplement: supplementary_material [file attachment]
